# Supplementary material for: Patient priorities in relation to surgery for gastric cancer: qualitative interviews with gastric cancer surgery patients to inform the development of a core outcome set
Source: PubMed Central journal article supplement (PMC7044961; doi:10.1136/bmjopen-2019-034782), 2020-02-12
Supplement: bmjopen-2019-034782.draft_revisions.pdf [file bmjopen-2019-034782.draft_revisions.pdf]

# BMJ Open

BMJ Open is committed to open peer review. As part of this commitment we make the peer review history of every article we publish publicly available.

When an article is published we post the peer reviewers' comments and the authors' responses online. We also post the versions of the paper that were used during peer review. These are the versions that the peer review comments apply to.

The versions of the paper that follow are the versions that were submitted during the peer review process. They are not the versions of record or the final published versions. They should not be cited or distributed as the published version of this manuscript.

BMJ Open is an open access journal and the full, final, typeset and author-corrected version of record of the manuscript is available on our site with no access controls, subscription charges or pay-per-view fees (<http://bmjopen.bmj.com>).

If you have any questions on BMJ Open's open peer review process please email [info.bmjopen@bmj.com](mailto:info.bmjopen@bmj.com)

# BMJ Open

## Patient Priorities in Relation to Surgery for Gastric Cancer: Qualitative Interviews with Gastric Cancer Surgery Patients to Inform the Development of a Core Outcome Set.

|                               |                                                                                                                                                                                                                                                                                                                                                       |
|-------------------------------|-------------------------------------------------------------------------------------------------------------------------------------------------------------------------------------------------------------------------------------------------------------------------------------------------------------------------------------------------------|
| Journal:                      | <i>BMJ Open</i>                                                                                                                                                                                                                                                                                                                                       |
| Manuscript ID                 | bmjopen-2019-034782                                                                                                                                                                                                                                                                                                                                   |
| Article Type:                 | Original research                                                                                                                                                                                                                                                                                                                                     |
| Date Submitted by the Author: | 08-Oct-2019                                                                                                                                                                                                                                                                                                                                           |
| Complete List of Authors:     | Alkhaffaf, Bilal; Manchester University NHS Foundation Trust, Department of Oesophago-Gastric Surgery<br>Blazeby, Jane; University of Bristol, Department of Social Medicine<br>Bruce, Iain; Manchester University Hospitals NHS Foundation Trust, Paediatric ENT Department<br>Morris, Rebecca L.; University of Manchester, Centre for Primary Care |
| Keywords:                     | Adult surgery < SURGERY, Gastrointestinal tumours < ONCOLOGY, ONCOLOGY, SURGERY                                                                                                                                                                                                                                                                       |
|                               |                                                                                                                                                                                                                                                                                                                                                       |

SCHOLARONE™  
Manuscripts

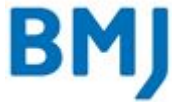

I, the Submitting Author has the right to grant and does grant on behalf of all authors of the Work (as defined in the below author licence), an exclusive licence and/or a non-exclusive licence for contributions from authors who are: i) UK Crown employees; ii) where BMJ has agreed a CC-BY licence shall apply, and/or iii) in accordance with the terms applicable for US Federal Government officers or employees acting as part of their official duties; on a worldwide, perpetual, irrevocable, royalty-free basis to BMJ Publishing Group Ltd ("BMJ") its licensees and where the relevant Journal is co-owned by BMJ to the co-owners of the Journal, to publish the Work in this journal and any other BMJ products and to exploit all rights, as set out in our [licence](#).

The Submitting Author accepts and understands that any supply made under these terms is made by BMJ to the Submitting Author unless you are acting as an employee on behalf of your employer or a postgraduate student of an affiliated institution which is paying any applicable article publishing charge ("APC") for Open Access articles. Where the Submitting Author wishes to make the Work available on an Open Access basis (and intends to pay the relevant APC), the terms of reuse of such Open Access shall be governed by a Creative Commons licence – details of these licences and which [Creative Commons](#) licence will apply to this Work are set out in our licence referred to above.

Other than as permitted in any relevant BMJ Author's Self Archiving Policies, I confirm this Work has not been accepted for publication elsewhere, is not being considered for publication elsewhere and does not duplicate material already published. I confirm all authors consent to publication of this Work and authorise the granting of this licence.

1  
2  
3  
4 Title Page  
5

6 **Patient Priorities in Relation to Surgery for Gastric Cancer: Qualitative Interviews with Gastric**  
7 **Cancer Surgery Patients to Inform the Development of a Core Outcome Set.**  
8  
9

10  
11  
12  
13  
14 **Authors**  
15

16 Bilal Alkhaffaf<sup>1,2,3</sup>, Jane Blazeby<sup>4</sup>, Iain A Bruce<sup>5,6</sup> Rebecca Morris<sup>7</sup>.  
17  
18

19 **Affiliations**  
20

21  
22 <sup>1</sup>Department of Oesophago-Gastric Surgery, Manchester Royal Infirmary, Manchester University  
23 Hospitals NHS foundation Trust, Manchester, UK  
24

25  
26  
27 <sup>2</sup>Department of Oesophago-Gastric Surgery, Salford Royal Hospital, Salford Royal NHS foundation  
28 Trust, Manchester, UK  
29

30  
31  
32 <sup>3</sup>Division of Cancer Sciences, School of Medical Sciences, Faculty of Biology, Medicine and Health,  
33 University of Manchester, UK  
34

35  
36  
37 <sup>4</sup>Centre for Surgical Research and Bristol NIHR Biomedical Research Centre, University of Bristol,  
38 UK  
39

40  
41  
42 <sup>5</sup> Paediatric ENT Department, Royal Manchester Children's Hospital, Manchester University NHS  
43 Foundation Trust, Manchester Academic Health Science Centre, Manchester, UK  
44

45  
46  
47 <sup>6</sup> Division of Infection, Immunity and Respiratory Medicine, Faculty of Biology, Medicine and  
48 Health, University of Manchester, UK  
49

50  
51  
52 <sup>7</sup>NIHR Greater Manchester Patient Safety Translational Research Centre, Division of Population  
53 Health, Health Services Research & Primary Care, University of Manchester, Manchester, UK  
54  
55  
56  
57  
58  
59  
60

**Corresponding Author**

Mr Bilal Alkhaffaf

Consultant Oesophago-Gastric Surgeon

Manchester University Hospitals NHS Foundation Trust

Manchester Royal Infirmary

Oxford Road

M13 9WL

E-mail: [bilal.alkhaffaf@srft.nhs.uk](mailto:bilal.alkhaffaf@srft.nhs.uk)

Telephone: +44 161 206 0449

**Author E-mail Addresses**

Jane Blazeby – [j.m.blazeby@bristol.ac.uk](mailto:j.m.blazeby@bristol.ac.uk)

Iain A Bruce – [iain.bruce@mft.nhs.uk](mailto:iain.bruce@mft.nhs.uk)

Rebecca Morris – [rebecca.morris@manchester.ac.uk](mailto:rebecca.morris@manchester.ac.uk)

**Manuscript date:** 05/10/2019

**Reprints**

Reprints will not be available from the authors.

**Funding**

This study is funded by the National Institute for Health Research (NIHR) Doctoral Research Fellowship Grant (DRF-2015-08-023). JMB is partially funded by the NIHR Bristol Biomedical Research Centre

### **Conflicts of Interest**

The authors report no conflicts of interest.

### **Disclaimer**

This paper presents independent research funded by the National Institute for Health Research (NIHR). The views expressed are those of the author(s) and not necessarily those of the NHS, the NIHR or the Department of Health.

### **Data Availability**

Data are available upon reasonable request.

### **Acknowledgements**

The authors would like to thank all those who participated in this study. The authors would also like to highlight the role undertaken by Dr Ola Metryka, Senior Clinical Trials Coordinator, who facilitated the running of the study.

### **Running Title**

Patient Priorities Following Surgery for Gastric Cancer

**Word Count:** 5308

**Number of tables:** 3

**Number of figures:** 0

**Number of appendices:** 2

## Structured Abstract

### Objective

The reporting of outcomes in surgical trials for gastric cancer is inconsistent. The GASTROS study (GAstric Cancer Surgery TRials Reported Outcome Standardisation) aims to address this by developing a core outcome set (COS) for use in all future trials within this field. A COS should reflect the views of all stakeholders, including patients. We undertook a series of interviews to identify priorities, outcomes and themes important to patients which would be considered for inclusion in a COS.

### Setting

All interviews took place within the United Kingdom. Interviews were carried out face-to-face at hospitals and cancer support centres or via the telephone.

### Participants

Twenty participants at varying stages of recovery following surgery for gastric cancer with curative intent.

### Design

Qualitative design using semi-structured interviews, supported by an interview guide which was iteratively modified; thematic analysis was used to explore patient priorities.

### Results

Six themes enveloping 38 outcomes were identified; surviving and controlling cancer, technical aspects of surgery, adverse events from surgery, recovering from surgery, long-term problems following surgery and long-term life impact of surgery. The 'most important' patient priority was to be 'cured of cancer'.

### Conclusion

1  
2  
3 Surgical trials for gastric cancer should consider broader priorities of patients when choosing which  
4  
5 outcomes to report. This study highlighted the importance of longer-term outcomes such as cancer  
6  
7 survival. Outcomes identified in this study will be used to inform an international Delphi survey to  
8  
9 develop a COS in this field.  
10

11  
12 **KEYWORDS:**  
13

14  
15 Surgical Oncology  
16

17  
18 Stomach Neoplasms  
19

20  
21 Outcome Assessment  
22

23  
24 Patient Reported Outcome Measures  
25

26  
27 Treatment Outcome  
28

29  
30 Outcome reporting  
31  
32  
33  
34  
35  
36  
37  
38  
39  
40  
41  
42  
43  
44  
45  
46  
47  
48  
49  
50  
51  
52  
53  
54  
55  
56  
57  
58  
59  
60



## Article Summary

### Strengths and Limitations of This Study

- This is the first in-depth qualitative study to examine the priorities and experiences of patients following surgery for gastric cancer, and the first to establish which outcomes are important to patients.
- The study forms part of a larger project (The GASTROS Study - [www.gastrosstudy.org](http://www.gastrosstudy.org)) to develop a 'core outcome set' (COS) for use in surgical trials for gastric cancer and was reviewed and funded by the National Institute of Health Research (UK). The study is based on a reproducible and transparent methodology which has been subjected to critical appraisal during a peer-review process.
- The term 'outcome' was described to participants in a manner relatable to them, such that they understood it and were able to identify which outcomes were most important.
- The patient population was limited to UK-based English speakers. The views of international patients may vary due to differences in culture and clinical practice.

## Main Article

### Introduction

#### Background

Gastric cancer is a leading cause of cancer-related death world-wide<sup>1,2</sup>. Whilst surgery remains the only treatment which can offer a potential cure from this disease, it is associated with significant rates of morbidity in both the short and long-term<sup>3,4</sup>. Ideally, the optimal surgical approach would minimise the risk of short and long-term complications without jeopardising the oncological resection.

Identifying the optimal surgical approach for gastric cancer should be based on comparing and combining robust clinical evidence from well-designed randomised control trials. One of the present challenges to achieving this is the inconsistency in the reporting of outcomes in this field<sup>5</sup>. This limits evidence synthesis and contributes to 'research waste'. The GASTROS study (GASTROS – GAstric Cancer Surgery TRials Reported Outcome Standardisation - [www.gastrosstudy.org](http://www.gastrosstudy.org))<sup>6</sup> aims to address this issue by developing a 'core outcome set' (COS) – a *minimum* group of standardized and well-defined outcomes, measured by all future gastric cancer surgery trials<sup>7</sup>.

A guiding principle in the development of COS is that outcomes reflect the views and priorities of key stakeholders, including patients, to maximise the relevance and impact of future research. Previous studies have demonstrated variations in the views and priorities of clinicians and patients<sup>8-10</sup>, which can result in trials reporting outcomes which bear little relevance to patients. A systematic review of outcome reporting in surgical trials for gastric cancer has demonstrated that outcomes which may be important to gastric cancer patients, such as 'quality of life' after surgery are poorly represented within this field<sup>5</sup>. It is therefore important to understand which outcomes are important for patients undergoing gastric cancer surgery.

#### Objective

This research forms part of the GASTROS study, for which the protocol has been previously described<sup>6</sup>. The first stage in the study involves identifying a 'long-list' of potentially important outcomes which will be prioritised in stage two by participants undertaking a Delphi survey. It is not

1  
2  
3 known to what degree outcomes reported in previously published trials represent the priorities of  
4 patients undergoing gastric cancer surgery, and as such, solely relying on these as a source to populate  
5 the 'long-list' may overlook potentially important outcomes. By exploring the experiences,  
6 perceptions and priorities of patients who have undergone surgery for gastric cancer, this study aimed  
7 to identify themes and outcomes which may not have been previously reported in the literature.  
8  
9  
10  
11  
12  
13  
14  
15  
16  
17  
18  
19  
20  
21  
22  
23  
24  
25  
26  
27  
28  
29  
30  
31  
32  
33  
34  
35  
36  
37  
38  
39  
40  
41  
42  
43  
44  
45  
46  
47  
48  
49  
50  
51  
52  
53  
54  
55  
56  
57  
58  
59  
60

For peer review only

## Methods

### Study Design

The role of qualitative research methods in the development of COS has been previously explored<sup>11</sup> and has been advocated by groups such as the COMET initiative<sup>7</sup> as one of several approaches to ensure that outcome lists being considered for prioritisation are exhaustive. This qualitative study used a semi-structured interview approach to achieve the primary objective of identifying outcomes of importance to patients. A series of open questions were used to facilitate a patient-led discussion, guided by additional prompts from a pre-prepared interview schedule (table 1) to ensure key areas were covered.

Additional focused questioning around the use of outcomes in research was also included. In the context of clinical research, terms such as ‘outcomes’ may not be well understood by patients<sup>11</sup> and so a mixture of open and closed questioning was important. Participant interviews were undertaken in series of three following which transcript analysis (see below) was undertaken and the interview schedule was modified iteratively. This ensured that areas raised by earlier participants, but not included in the original schedule, were covered in subsequent discussions.

### Sampling

The eligibility criteria for this study are summarized in table 2. A purposive sampling strategy was adopted across the following characteristics:

- Age (above and below 70 years).
- Gender (men and women)
- Time since surgery (less than a year, one to three years and more than three years)

Interviews were undertaken until ‘data-saturation’ was achieved. Data saturation was determined when there was no new data emerging that had interpretive value.

Participants were recruited from across the United Kingdom from three sources:

- 1  
2  
3 1. A regional specialist gastric cancer centre: patients were approached in the outpatient clinic  
4  
5 by their direct care team.  
6
- 7 2. Patient organisations: patient groups were asked to contact their membership through e-mail  
8  
9 and social media.  
10
- 11 3. Snowball sampling; patients who had been recruited or contacted to participate were asked to  
12  
13 identify other patients who would be interested in the study.  
14  
15  
16  
17

### 18 Data Collection

19  
20 Interviews were undertaken between February and May 2017 and were conducted by BA, a  
21  
22 consultant surgeon and researcher with approximately ten years' experience of managing and  
23  
24 communicating with gastric cancer patients. Participants were invited to choose between a University  
25  
26 Teaching Hospital, two purpose-built patient cancer centres, or their home for the location of the  
27  
28 meeting. Participants were also offered the opportunity to have their interviews over the telephone.  
29  
30 Participants were offered travel expenses to minimise any financial burden on taking part in the study.  
31  
32

33 In addition to the purposive sampling strategy, the following demographic data was collected:

- 34 • Gender (male/female)
- 35
- 36 • Social circumstances (e.g. lives alone/with partner/lives with dependents)
- 37
- 38 • Age
- 39
- 40 • Time since surgery (in months)
- 41
- 42 • The type of gastrectomy (total or partial gastrectomy)
- 43
- 44 • The approach to their surgery (open or laparoscopic)
- 45
- 46 • Whether they had undergone additional treatment (e.g. chemotherapy)
- 47
- 48 • Whether they had suffered a post-operative complication
- 49
- 50 • Ethnicity
- 51
- 52 • Previous trial enrolment
- 53
- 54 • Participant post-code (to identify location and social deprivation score)
- 55  
56  
57  
58  
59  
60

1  
2  
3 Full written consent was taken immediately prior to the interview and the participant was reminded  
4 that they were able to stop at any point or withdraw from the study without needing to give a reason.  
5  
6

### 7 8 Data Analysis 9

10 All interviews were digitally recorded and professionally transcribed (intelligent verbatim  
11 transcription). A thematic analysis was used to identify emerging themes. Themes were developed  
12 using a three-step approach of open coding, axial coding and selective coding<sup>12</sup> of the transcripts.  
13 Given the objective of this study was to identify themes and outcomes not previously reported in  
14 trials, it was important not to base data analysis and outcome identification on a framework built on  
15 previously published literature. BA and RM (a researcher with significant experience in qualitative  
16 research methods) independently analysed the first two transcripts and through discussion identified  
17 themes and adjustments to the interview schedule. Regular discussion between BA and RM took  
18 place throughout the study to ensure that there was agreement with the analysis. Data analysis was  
19 supported using NVivo 11 ([http://www.qsrinternational.com/products\\_nvivo.aspx](http://www.qsrinternational.com/products_nvivo.aspx), QSR International,  
20 Burlington, MA, USA).  
21  
22  
23  
24  
25  
26  
27  
28  
29  
30  
31  
32  
33  
34  
35

### 36 Approvals and Portfolio Adoption

37 The study was given ethical approval by the National Research Ethics Service North West—Cheshire  
38 (11/NW/0739) and governance approvals by Central Manchester University Hospital NHS  
39 Foundation Trust. The study was adopted by the National Institute for Health Research (NIHR)  
40 Clinical Research Network Portfolio (ID 33312).  
41  
42  
43  
44  
45  
46

### 47 Reporting

48 This paper uses the SRQR checklist to structure the report of the study findings<sup>13</sup>.  
49  
50

### 51 Patient and Public involvement

52 A Study Advisory Group (SAG) forms part of the management structure of the wider GASTROS  
53 study<sup>6</sup>, of which this qualitative study forms part of the first stage. The SAG is made up of key  
54 stakeholder representatives including patients, oncology nurses and surgeons. The group provides  
55 advice on the methodology of the study, general delivery of the study against its stated objectives and  
56  
57  
58  
59  
60

1  
2  
3 ensures that the viewpoints of all stakeholder groups are considered. The results of this study were  
4 presented to a SAG meeting; the ensuing discussion influenced the design of the next stage of the  
5 study in preparation for an international Delphi Survey.  
6  
7  
8  
9  
10  
11  
12  
13  
14  
15  
16  
17  
18  
19  
20  
21  
22  
23  
24  
25  
26  
27  
28  
29  
30  
31  
32  
33  
34  
35  
36  
37  
38  
39  
40  
41  
42  
43  
44  
45  
46  
47  
48  
49  
50  
51  
52  
53  
54  
55  
56  
57  
58  
59  
60

For peer review only

**Table 1. Interview schedule.**

|    |                                                                                                                                                                                                                                                                                                                                                                                                    |
|----|----------------------------------------------------------------------------------------------------------------------------------------------------------------------------------------------------------------------------------------------------------------------------------------------------------------------------------------------------------------------------------------------------|
| 1. | I understand you have (had) gastric cancer. Can you tell me about that?                                                                                                                                                                                                                                                                                                                            |
| 2. | <p><i>Could you tell me about how you first found out you had gastric cancer?</i></p> <p>Prompts:</p> <ul style="list-style-type: none"> <li>• <i>What questions did you most want to ask, when you were told that you had gastric cancer?</i></li> </ul>                                                                                                                                          |
| 3  | <p>Were there were any areas you wanted more information about but were unable to find?</p> <p>Prompts:</p> <ul style="list-style-type: none"> <li>• <i>Were you given any leaflets at the time of diagnosis? Did you find these useful?</i></li> </ul>                                                                                                                                            |
| 4  | <p>What treatment was offered and how you decide about undergoing treatment.</p> <p>Prompts:</p> <ul style="list-style-type: none"> <li>• <i>What information did you want about the treatment you would be receiving?</i></li> <li>• <i>What factors did you consider when deciding on the treatment?'</i></li> </ul>                                                                             |
| 5  | <p>What effects did the treatment have on you after surgery?</p> <p>Prompts:</p> <ul style="list-style-type: none"> <li>• <i>Did the treatment affect your physical or mental well-being?</i></li> <li>• <i>Did the treatment have an effect on relationships with those around you?</i></li> <li>• <i>Did you have to make any changes to your behaviour as a result of treatment?</i></li> </ul> |
| 6  | <p>What long-term effects did the treatment have on you?</p> <p>Prompts:</p> <ul style="list-style-type: none"> <li>• <i>Did the treatment affect your physical or mental well-being?</i></li> <li>• <i>Did the treatment have an effect on relationships with those around you?</i></li> <li>• <i>Did you have to make any changes to your behaviour as a result of treatment?</i></li> </ul>     |
| 7  | What was the worst side effect of treatment?                                                                                                                                                                                                                                                                                                                                                       |
| 8  | What are your concerns for the future, especially those relating to their diagnosis/history of gastric cancer?                                                                                                                                                                                                                                                                                     |



|    |                                                                                                                                                                                                           |
|----|-----------------------------------------------------------------------------------------------------------------------------------------------------------------------------------------------------------|
| 9  | Did the explanation of what you should expect from surgery match your real experience?                                                                                                                    |
| 10 | In the context of research studies, can you explain what an outcome is in your own words?<br>The interviewer will then provide a definition of the term 'outcome' is in the context of clinical research. |
| 11 | What, in your opinion, is the most important outcome to measure in gastric cancer surgery trials?                                                                                                         |
| 12 | Are there any other outcomes which may be important to measure?                                                                                                                                           |
| 13 | Has your perspective on what is important changed over time?                                                                                                                                              |
| 14 | Is there anything else that you feel is important to talk about that we have not discussed?                                                                                                               |

**Table 2. Eligibility criteria for study participants.**

|              | Potential Participants Approached                                                                                                                                                 | Potential Participants Not Approached                                                                                                                                                                       |
|--------------|-----------------------------------------------------------------------------------------------------------------------------------------------------------------------------------|-------------------------------------------------------------------------------------------------------------------------------------------------------------------------------------------------------------|
| Participant  | <ul style="list-style-type: none"> <li>• Male and females aged 18 years and older.</li> <li>• Individuals able to participate in an interview in the English language.</li> </ul> | <ul style="list-style-type: none"> <li>• Patients unable to give informed consent</li> <li>• Patients too unwell to comfortably participate in an interview lasting approximately 30-60 minutes.</li> </ul> |
| Pathology    | <ul style="list-style-type: none"> <li>• Adenocarcinoma and squamous cell carcinoma of the stomach, (which makes up 95 per cent of all stomach tumours).</li> </ul>               | <ul style="list-style-type: none"> <li>• Gastrointestinal Stromal Tumours</li> <li>• Neuro-endocrine tumours</li> <li>• Lymphoma</li> <li>• Benign disease</li> </ul>                                       |
| Intervention | <ul style="list-style-type: none"> <li>• Total and partial gastrectomy</li> <li>• Open and laparoscopic approaches</li> </ul>                                                     | <ul style="list-style-type: none"> <li>• Surgery with palliative intent</li> <li>• Endoscopic therapies such as EMR (endoscopic mucosal resection) and ESD (endoscopic Submucosal dissection)</li> </ul>    |

## Results

### Overview

In total, 20 patients were interviewed. Table 3 summarises demographic data and treatment-related characteristics of participants. Interviews lasted a median of 50.5 minutes (29-75 minutes). No patients withdrew from the study. Data saturation was deemed to have been reached by 20 interviews; one new outcome was identified in interview number 18 (related to sexual activity), however, no further outcomes were identified from the following two transcripts.

### Outcome Themes

Six broad themes enveloping 38 outcomes were identified;

1. Surviving and controlling cancer,
2. Technical aspects of surgery,
3. Adverse events from surgery,
4. Recovering from surgery,
5. Long-term problems following surgery and
6. Long-term life impact of surgery.

Appendix 1 provides a breakdown of how all themes were developed from outcomes identified during the interviews. Themes were well represented in each interview; each theme was discussed by at least 18 of 20 participants. Appendix 2 demonstrated the outcomes identified during the interviews and how often they were referenced.

#### *Theme 1: Surviving and controlling cancer*

For most, details of their initial consultation were sketchy; participants often described being given lots of information about their diagnosis, much of which was not absorbed. However, patients clearly remember their reaction to being told their cancer diagnosis; for most, the response was the same:

“When you hear the word, cancer, you think that’s it. I’m going to die.” (participant 6)

There was a range of personal experience with cancer within our patient group. Some had direct family members who had undergone chemotherapy and had an intimate knowledge of its effects.

1  
2  
3 “it was my worst nightmare come true because I lost my dad to cancer and I always had it in  
4 the back of my mind, well if one person in the family could get cancer from somewhere then  
5 we could as well.” (participant 19)  
6  
7  
8  
9

10 Some patients had a vague knowledge of friends or work colleagues who had undergone treatments  
11 for cancer and others had no prior experience of cancer at all. Despite these differences, the initial  
12 responses to their diagnosis were similar.  
13  
14  
15

16 All participants in our study had undergone radical surgery with curative intent. Once the discussion  
17 with their surgeon moved away from the diagnosis and onto potentially curative treatments,  
18 participants often focused their questions on ‘survival’:  
19  
20  
21  
22

23  
24 “I wanted to know what the chances were of me having this removed and not, well, basically  
25 not dying from it.” (participant 4)  
26  
27  
28

29 Despite radical surgery (and peri-operative chemotherapy in half of our participants), for many of the  
30 participants the fear of recurrence remained a permanent anxiety. Many participants seemed to  
31 understand that due to the aggressive nature of gastric cancer, recurrence is a possibility for many:  
32  
33  
34

35  
36 “...you’re always worried that it’s going to come back...” (participant 7)  
37  
38

39 The study cohort included participants who had undergone surgery between 5 months and 14 years  
40 prior to the interviews. There did not seem to be a relationship between the length of time out of  
41 surgery and concerns about cancer recurrence.  
42  
43  
44

#### 45 *Theme 2: Technical aspects of surgery*

46 Several outcomes related to this theme were discussed by participants. Most importantly, participants  
47 focused on whether the surgical team was able to excise the ‘cancer’ in its entirety. This priority was  
48 often referenced in relation to the ‘success’ of surgery and its contribution to ‘curing’ participants of  
49 cancer:  
50  
51  
52  
53  
54

55  
56 “...thinking to yourself that, you know, everything has been done to the best of the hospital’s  
57 ability, and, you know, they’ve taken absolutely everything out.” (participant 4)  
58  
59  
60

1  
2  
3 Whilst participants mostly referred to the cancer as a single 'entity', there were a small number who  
4 demonstrated some knowledge of the importance of different aspects of surgery such as lymph node  
5 excision:  
6  
7

8  
9 "And yeah, I remember the news about the pathology on the bits they'd taken away, and the  
10 lymph node system and what not, came a week or two before I was due to go back on the  
11 chemo." (participant 20)  
12  
13  
14

15 Six participants underwent a minimally invasive surgery with the remainder undergoing open surgery.  
16 The size of the wounds or type of surgical approach was referred to by only a minority of our  
17 participants. In the main, these were made in passing as little importance was placed on the surgical  
18 approach:  
19  
20  
21  
22

23  
24 Interviewer: "Okay, and what...what did that mean for you to have keyhole surgery?"

25  
26 Respondent: "It didn't mean anything really, you know, I had...I'd heard about keyhole and  
27 people who'd had it." (participant 5)  
28  
29  
30  
31

### 32 33 *Theme 3: Adverse events following surgery*

34 Eleven participants suffered a complication following surgery; however, this theme was important to  
35 all interviewees. Peri-operative death was the most frequently discussed surgical complication:  
36  
37  
38

39  
40 "...the fear of dying on the operating table is really real." (participant 2)  
41  
42

43 During their surgical consultation, participants retained some understanding of the risk of peri-  
44 operative death and many were able to quote figures about how likely this complication was. Other  
45 complications were highlighted when recounting a personal experience. While all complications  
46 occurred in the post-operative period, there were several different causes attributed to these events  
47 (e.g. direct surgical, anaesthesia-related and medication-related). The severity and consequences of  
48 the complications also varied significantly; some were self-limiting and resulted in a minor extension  
49 of the length of hospital stay:  
50  
51  
52  
53  
54  
55

56  
57 "But I was out of it for three days, I was just hallucinating and God knows what, probably  
58 because of the morphine." (participant 7)  
59  
60

1  
2  
3 And those which were life-threatening and required significant clinical intervention:  
4  
5

6 “It was a twisted bowel. Yeah, I was told it was a twisted bowel. Because I always  
7  
8 remember that when they brought me back from obviously having a look and everything, I  
9  
10 always remember [they] said...we're going to have to take you back to surgery.” (participant  
11  
12 15)  
13  
14

15 The severity of the complications suffered did not seem to shape the key priorities in relation to  
16  
17 participants’ ‘worst side effect’ of surgery or ‘most important outcome’; these almost entirely related  
18  
19 to ‘long-term impacts of surgery’ and ‘cure’ respectively (see below) regardless of how long ago their  
20  
21 operation was and which surgical approach (laparoscopic or open surgery) was employed.  
22  
23

24 Whilst participants recounted that some of the more serious complications (e.g. death, anastomotic  
25  
26 leak and cardio-pulmonary complications) were described by surgeons during the consent process,  
27  
28 some were exposed to other sources of information in the pre-operative stage. Participants were  
29  
30 regularly provided with written information about their cancer and its management, however the  
31  
32 quality and content of this varied depending on the location of their hospital. The response to this  
33  
34 format was varied:  
35  
36

37 “I’m going to be honest with you, I didn’t actually read them... because I didn’t want things  
38  
39 going in my head that I couldn’t take in.” (participant 17)  
40  
41

42 Participants that read the written information often found them difficult to digest for several reasons  
43  
44 including the volume of information and fear of the gravity of the diagnosis or prognosis:  
45  
46

47 “Well some of it were just waste of time, but others, you know, if you’ve got a book about  
48  
49 that thick and you read through it and half of it applies to you, and the others just  
50  
51 sort...doesn’t apply, you know.” (participant 5)  
52

53 “As much as it’s alright handing leaflets out, I can...I am a bit of a reader so I will read stuff,  
54  
55 but when you think you’ve got a death sentence you think, what’s the point in reading that?”  
56  
57 (participant 13)  
58  
59  
60

1  
2  
3 Several hospitals had patient-support groups which provide a 'buddy' system for those awaiting  
4 surgery. These support groups became an important part of the recovery process and continue to be  
5 relevant many years after surgery. Patients found these more useful as they had the opportunity to  
6 speak to those with lived experience of the diagnosis and treatment. Whilst this served as an important  
7 source of information to tackle the longer-term impacts of surgery (below), these groups also provided  
8 comfort to patients:  
9  
10  
11  
12  
13  
14

15  
16 "I think the support group and speaking to people that have been through it, because it  
17 can demystify it quite a lot." (participant 2)  
18  
19

20 Peer support also provided additional sources of information to participants in the pre-operative  
21 period with respect to some of the complications that could arise:  
22  
23

24  
25 "And I know one guy, where the oesophagus junction was, he'd had that leaking, and he  
26 couldn't eat more than, like, grains of rice and things; so that would be pretty  
27 horrendous." (participant 4)  
28  
29  
30

31 As a result of verbal and written information from healthcare professionals and additional peer  
32 support, participants were able to describe key adverse without necessarily having experienced them  
33 firsthand.  
34  
35  
36  
37  
38  
39

#### 40 *Theme 4: Recovery from surgery*

41 Experiences during the immediate post-operative recovery period were referenced by 18 study  
42 participants. Whilst some participants' experience of recovery from surgery was directly linked to  
43 complications, there were aspects of recovery such as post-operative pain, mobility and the  
44 recommencement oral intake that were common amongst all those who spoke this theme.  
45  
46  
47  
48  
49  
50

51 Most participants did not mention post-operative pain as an important focus. Those that did, expected  
52 to suffer a degree of pain, however experiences of its severity varied widely. Pain levels amongst  
53 interviewees who had undergone similar operations through laparotomy incisions were not uniform.  
54  
55  
56  
57  
58 One participant who had open surgery described:  
59  
60

1  
2  
3 “I do remember waking up and really being in a hell of a lot of pain and being really out  
4 of it.” (participant 6)  
5  
6

7 Whilst another who had undergone their surgery using the same approach recounted:

8  
9 “I didn't really have much pain.” (participant 14)  
10

11 Discussions around post-operative pain were not confined to discomfort from the surgical incisions,  
12 but also related to post-operative complications:  
13

14  
15 “I was back in writhing in agony with a serious infection in the wound.” (participant 9)  
16

17 Participants recounted the limitations in their mobility during the post-operative period. There were  
18 many factors contributing to this, including physical weakness, not receiving appropriate  
19 encouragement to mobilise and being restricted by surgical drains:  
20  
21

22  
23 “...really difficult to be mobile I suppose, and move around, yourself, ‘cause obviously  
24 you’ve got quite a lot of tubes and different things coming out. I felt very, very swollen.”  
25  
26  
27  
28 (participant 6)  
29  
30  
31

### 32 33 *Theme 5: Long-term problems following surgery* 34

35 All participants described significant long-term symptoms related to surgery. For the most, this  
36 represented the ‘worst side effect’ in relation to their treatment and outcomes from this theme were  
37 referenced more than any other theme further emphasising its importance. All participants described  
38 experience with struggling to eat and drink following surgery and the majority (16/20) talked  
39 extensively about the impact of fatigue on their daily lives. Problems with maintaining weight, issues  
40 with ongoing gastro-intestinal symptoms and chronic pain were discussed by most participants.  
41  
42  
43  
44  
45  
46  
47  
48

49 Fatigue was described in many ways; ‘exhaustion’, ‘feeling tired all the time’, ‘feeling so weak’ and  
50 ‘having no energy’. For the main, fatigue was a symptom which persisted for months after surgery  
51 and could impact on a participant’s ability to undertake day-to-day activities or to socialise:  
52  
53

54  
55 “Well, I'm so weak, I used to go out, you know, and do fishing and do things with my lads.  
56  
57 I'm just getting that little bit better now after eight months, but I'm so weak and tired.”  
58  
59 (participant 18)  
60



1  
2  
3  
4  
5 Adapting to fatigue was and for many continued to be a difficult challenge, however many  
6 participants understood that this was s a recognised and acceptable symptom to them given the  
7 magnitude of the surgery:  
8  
9

10  
11 “I've come out with...more...appreciation for looking after myself and my...And if I'm tired, I  
12 stop.” (participant 15)  
13  
14  
15

16  
17  
18 There were several causes for the struggles participants associated with eating and drinking.  
19 Participants often described having to eat and drink smaller volumes more frequently and some were  
20 unable to tolerate certain food types or consistencies. This had a direct effect on the pleasure  
21 associated with eating and an impact on where participants could eat:  
22  
23  
24

25  
26 “Well I don't eat what I would like to...But I know that for the rest of my life, I won't be able  
27 to go out for big meals, to big venues and eat like I used to eat before, you know.” (participant  
28 5)  
29  
30  
31  
32

33 Most participants recounted being told prior to their surgery that their diet would be different and that  
34 they would have to ‘learn how to eat again’. Despite this, some participants felt that not enough  
35 information was given to highlight the true impact of this long-term issue and methods to address it:  
36  
37  
38

39  
40 “I think it's a lot worse than what they tell you. Because like some days, I'll eat a certain thing  
41 which I've ate before, and you just can't breathe properly, it's choking you.” (participant 18)  
42  
43  
44  
45

46  
47 A broad range of gastro-intestinal symptoms were reported by participants. The time frame relating to  
48 how long these persisted was similarly broad (sometimes months and years) and did not seem to  
49 follow a pattern. Nausea, vomiting, diarrhoea, reflux and belching were the commonest problems  
50 described. Many of these symptoms resulted in significant impacts on quality of life (see theme 6  
51 below):  
52  
53  
54  
55

56  
57 “...I still get the bile reflux and I get this constant pain in the oesophagus which affects my  
58 sleeping as well.” (participant 7)  
59  
60

1  
2  
3  
4  
5 “The dumping syndrome was mentioned. Never understood it until it happened. You know,  
6 how my body reacted to certain foods that I'd normally eat that it doesn't like anymore.”  
7  
8  
9 (participant 15)  
10  
11  
12  
13

#### 14 *Theme 6: Long-term life impact of surgery*

15  
16 The long-term effects on ‘normality’, quality of life, and psychological impact of surgery were  
17 discussed extensively by all patients. A strong desire to return to a form of ‘normality’ was regularly  
18 expressed. Whilst the reference point for ‘normality’ differed amongst patients, common  
19 characteristics existed; namely a desire to do what they used to do such as working, exercising,  
20 socialising with friends and family and being able to travel:  
21  
22  
23  
24  
25

26 “it’s about living as I did before, and forgetting what had happened, and I do that quite often.”  
27  
28 (participant 6)  
29  
30  
31  
32

33 The experience of returning to normality varied amongst those interviewed. Many participants were  
34 largely able to return to their ‘normal’ activities albeit with some modifications:  
35  
36

37 “Yes. I want to go on holidays again. I love cruises and I want...but until my eating’s  
38 improved, I wouldn’t do that.” (participant 1)  
39  
40  
41  
42

43 “Now that it’s 18 months on, I am back to having what would be a normal life again, now,  
44 albeit with smaller portions of meals and things” (participant 4)  
45  
46  
47  
48  
49

50 Some participants however have not been able to return to activities that provided them with  
51 significant enjoyment:  
52  
53

54 “I’ve never actually got back to my normal activity. I’ve never played golf since that day and  
55 I used to love golf.” (participant 4)  
56  
57  
58  
59  
60

In general, participants understood that life after gastrectomy would be different:

1  
2  
3 “I’m still alive, and then I need to get back to normal. It takes a while for you to realise your  
4 new normality is not like your old normality.” (participant 2)  
5  
6  
7  
8

9 Whilst much of the discussion relating to ‘normality’ centred around specific tasks which participants  
10 valued or missed, the impact of gastrectomy on a participant’s overall general quality of life was  
11 important to many. Many understood that quality of life needed to be redefined in comparison to life  
12 before surgery, but nonetheless there was a minimum level that would need to be achieved:  
13  
14  
15  
16

17  
18 “if I have some sort of quality of life, where I can get up and wash myself and do, that is  
19 something that I’d live for. But I couldn’t be sat there and nursed 24/7” (participant 17)  
20  
21  
22  
23

24 The psychological burden on participants following gastrectomy is a significant one. Each of the  
25 previously discussed themes could impact on a participant’s mental state and whilst certain phases of  
26 the treatment pathway were time-limited, the psychological effects could persist for much longer;  
27  
28  
29

30  
31 “You don’t just suffer from physical; you suffer from mental. And I think the mental is a lot  
32 more powerful than the physical, because you can shut pain off by taking medication, but it’s  
33 very hard to shut problems off mentally.” (participant 18)  
34  
35  
36

37  
38 “You know, ‘cause psychologically you think you’ve still got this poison in your body, as  
39 much as I’ve got rid of, you know, my monster.” (participant 13)  
40  
41  
42

43 Some of the psychological impacts were associated with participants having to adapt to a new  
44 normality in relation to what they were able to do, what they were able to eat, how they looked  
45 physically or how they felt around others:  
46  
47  
48

49  
50 “Well, it was a problem because like I say, I’ve always been a proud chap and proud of my  
51 body because I kept myself fit and everything. When I looked in the mirror, quite distressing.  
52 That was it, yeah. It makes you feel inferior.” (participant 18)  
53  
54  
55  
56  
57  
58  
59  
60

1  
2  
3 “I feel a freak, I feel when I go into a big room with people that everybody has got a stomach  
4 and I haven’t got one, it’s not that I want them to know, but I just don’t feel the same  
5 anymore...” (participant 8)  
6  
7  
8  
9

### 10 11 Definition of ‘outcome’ by patients

12 All participants were asked what their understanding of the term ‘outcome’ was in the context of  
13 clinical research. Two participants were able to provide a broad-ranging definition which  
14 encompassed some of the benefits and adverse effects of treatment:  
15  
16  
17  
18

19 “my perception of what would be meant by that phrase would...at a variety of levels; it could  
20 be does the patient live or die? Does the patient recover to an acceptable state for an extended  
21 period of time, and my understanding of what that might be, would be a, sort of, five year  
22 period...” (participant 20)  
23  
24  
25  
26  
27  
28  
29

30 One person stated that they did not know how to define the term, whilst the remainder defined  
31 ‘outcome’ by recounting a single outcome, which was most important to them:  
32  
33

34 “Okay, my understanding is that at the...the outcome would be that the cancer would be  
35 possibly all gone.” (participant 19)  
36  
37  
38  
39  
40

41 Participants were asked to provide a single outcome that was ‘most important to them’. Fifteen  
42 participants identified that the most important outcome was that they were ‘cured of cancer’ with the  
43 remaining five describing outcomes related to ‘returning to normal’ and being able to enjoy a ‘good  
44 quality of life’. These priorities did not alter with respect to how long-ago surgery was performed,  
45 which approach was undertaken or how old the patient was.  
46  
47  
48  
49  
50  
51  
52  
53  
54  
55  
56  
57  
58  
59  
60

**Table 3. Patient characteristics and demographic data.**

| Patient | Sex | Age | Ethnicity* | Social deprivation quintile** | Home circumstances  | Months since surgery | Type of surgery     | Approach to surgery | Post-operative complications | Peri-operative treatment |
|---------|-----|-----|------------|-------------------------------|---------------------|----------------------|---------------------|---------------------|------------------------------|--------------------------|
| 1       | F   | 74  | A          | 3rd                           | Lives alone         | 15                   | Partial Gastrectomy | Laparoscopic        | Yes                          | Nil                      |
| 2       | M   | 59  | B          | 3rd                           | Lives alone         | 27                   | Total Gastrectomy   | Open surgery        | Yes                          | Chemotherapy             |
| 3       | M   | 71  | A          | 1st                           | Lives alone         | 16                   | Partial Gastrectomy | Open surgery        | Yes                          | Nil                      |
| 4       | M   | 43  | A          | 2nd                           | Lives with parents  | 15                   | Total Gastrectomy   | Open surgery        | Yes                          | Chemotherapy             |
| 5       | M   | 80  | A          | 3rd                           | Lives alone         | 23                   | Partial Gastrectomy | Laparoscopic        | Yes                          | Nil                      |
| 6       | F   | 52  | A          | 2nd                           | Lives with children | 32                   | Total Gastrectomy   | Open surgery        | No                           | Chemotherapy             |
| 7       | M   | 79  | A          | 1st                           | Lives with spouse   | 58                   | Total Gastrectomy   | Laparoscopic        | Yes                          | Chemotherapy             |
| 8       | F   | 63  | A          | 1st                           | Lives alone         | 5                    | Total Gastrectomy   | Open surgery        | No                           | Nil                      |
| 9       | M   | 61  | A          | 3rd                           | Lives with spouse   | 170                  | Total Gastrectomy   | Open surgery        | No                           | Nil                      |

|    |    |    |   |     |                   |     |                     |              |     |              |
|----|----|----|---|-----|-------------------|-----|---------------------|--------------|-----|--------------|
| 10 | M  | 61 | C | 1st | Lives alone       | 79  | Total Gastrectomy   | Open surgery | No  | Chemotherapy |
| 11 | M  | 76 | A | 4th | Lives with spouse | 110 | Total Gastrectomy   | Laparoscopic | Yes | Chemotherapy |
| 12 | F  | 82 | A | 4th | Lives alone       | 62  | Partial Gastrectomy | Open surgery | No  | Nil          |
| 13 | F  | 59 | A | 2nd | Lives with spouse | 19  | Partial Gastrectomy | Open surgery | No  | Chemotherapy |
| 14 | M  | 70 | B | 1st | Lives alone       | 11  | Partial Gastrectomy | Open surgery | No  | Nil          |
| 15 | F  | 56 | M | 5th | Lives with parent | 33  | Total Gastrectomy   | Open surgery | Yes | Chemotherapy |
| 16 | F  | 84 | A | 1st | Lives alone       | 17  | Partial Gastrectomy | Laparoscopic | Yes | Nil          |
| 17 | M  | 48 | A | 4th | Lives with parent | 9   | Total Gastrectomy   | Laparoscopic | Yes | Chemotherapy |
| 18 | M  | 77 | A | 4th | Lives with spouse | 78  | Total Gastrectomy   | Open surgery | Yes | Nil          |
| 19 | Fe | 58 | A | 3rd | Lives with spouse | 11  | Partial Gastrectomy | Laparoscopic | No  | Nil          |
| 20 | M  | 54 | A | 1st | Lives with        | 48  | Partial Gastrectomy | Open surgery | No  | Chemotherapy |

1  
2  
3 spouse  
4  
5  
6  
7

8 \*A=, B= , C= , M= . \*\*Social deprivation quintile: 1<sup>st</sup> quintile being the least deprived, 5<sup>th</sup> quintile being the most deprived.  
9  
10  
11  
12  
13  
14  
15  
16  
17  
18  
19  
20  
21  
22  
23  
24  
25  
26  
27  
28  
29  
30  
31  
32  
33  
34  
35  
36  
37  
38  
39  
40  
41  
42  
43  
44  
45  
46

For peer review only

## Discussion

To our knowledge, this is the first in-depth qualitative study exploring the priorities of patients following surgery for gastric cancer. The themes identified highlight the profound and wide-ranging physical, social and psychological impacts that gastrectomy has on patients which can persist for months and years. We have previously described the reporting of outcomes in surgical trials for gastric cancer over a twenty-year period<sup>5</sup>. Most surgical trials in this field have focused on reporting short-term post-operative outcomes. Whilst these are important to patients, they are not representative of the whole picture. This work highlights how patient priorities for outcomes may differ from the traditional surgical focus. More work is now needed to develop the COS which incorporates views of all key stakeholders including patients.

More than half of the 'top-ten' most frequently discussed outcomes in our study related to longer-term issues such as problems with eating, returning to 'normality', fatigue, weight loss, gastro-intestinal symptoms and psychological impacts. These types of outcomes are infrequently reported in surgical trials and demonstrate that researchers within this field have not reflected the priorities of patients. This challenge needs to be addressed using an approach which is inclusive of patients and their views.

The GASTROS study aims to develop a COS; critically important outcomes which should be reported - as a minimum - by future surgical trials for gastric cancer<sup>6</sup>. By standardising the reporting of such outcomes, it aims to improve the ability to synthesise evidence, reduce research waste and ultimately aid researchers in answering important questions related to gastrectomy. The first stage in developing the COS consists of identifying a 'long-list' of outcomes which will then be prioritised by key stakeholders during an international online Delphi survey. The process of developing the long-list should be comprehensive and involve both healthcare professionals and patients in order to minimise the risk of omitting potentially important outcomes. Our study reaffirms the importance of a mixed-methods approach to identifying potentially important outcomes. As others COS developers have found, building a long-list based solely on outcomes reported in previous trials or as developed by clinicians often neglects the views of key stakeholders<sup>8-10</sup>. This ultimately runs the risk of producing a



1  
2  
3 COS which does not reflect the priorities of patients which does little to address the current challenges  
4  
5 with outcome reporting.  
6  
7

8 Understanding patient priorities following gastrectomy is invaluable for other reasons. Patients with  
9  
10 gastric cancer want detailed information about their condition and treatment<sup>14</sup>. With the knowledge  
11  
12 that long-term impacts of surgery are important, healthcare professionals can tailor the consent  
13  
14 process prior to surgery to ensure that the patient has a better understanding of these and is making an  
15  
16 informed decision. Considering patient priorities may also have implications for the future  
17  
18 development of national and international audits<sup>3,4</sup>. For several pragmatic reasons, most  
19  
20 comprehensive gastric cancer surgery audits focus on short-term outcomes. Identifying methods to  
21  
22 report longer-term quality outcome measures may make such audits more relevant to patients. Studies  
23  
24 assessing patients' views in similar disease areas found similar things, that long term outcomes  
25  
26 (survival and long term quality of life) were important<sup>15</sup>.  
27  
28  
29

### 30 **Strengths and weaknesses**

31  
32 The study was able to gain an in-depth understanding of patient priorities based on the experience of  
33  
34 participants with a broad range of characteristics representative of those undergoing surgery for  
35  
36 gastric cancer in the UK<sup>4</sup>. Furthermore, our purposive sampling approach was established *a priori* in a  
37  
38 study protocol which had undergone a robust peer-review process.  
39  
40

41 This study was also able to highlight and address significant challenges associated with the  
42  
43 comprehension of medical language by patients; particularly terms central to the development of a  
44  
45 COS. Patients largely did not understand the use of the term 'outcome' within the context of medical  
46  
47 research. Once it was defined as an 'impact or effect of a treatment which may be beneficial or  
48  
49 harmful', participants were more easily able to describe their key priorities in outcome reporting for  
50  
51 future trials. This has several implications for the GASTROS study as well as other COS projects  
52  
53 moving forward. It highlights the importance of ensuring that the premise of the study is clear and  
54  
55 understood by all participants, especially patients; outcomes included in the Delphi survey must be  
56  
57  
58  
59  
60

1  
2  
3 presented and explained in a manner which is accessible to all; 'outcome' must be clear when  
4  
5 adapting it to other regions where there may be no direct translation for the term.  
6  
7

8 The interviews were conducted by an expert in the field of gastric cancer surgery which may have  
9  
10 resulted in a degree of observer bias. To mitigate this potential limitation, the study management team  
11  
12 (which was made up primarily of members unfamiliar with gastric cancer surgery) was involved in  
13  
14 ongoing discussions during data collection and analysis. It is also possible that patients modified their  
15  
16 responses because of awareness of the background of the interviewer. Every effort was made to  
17  
18 follow the semi-structured interview schedule, to put the patients at ease and take time to let them  
19  
20 talk. The average length of the interviews (greater than 45 mins) reflects the time patients were given  
21  
22 to express their views. The GASTROS study aims to recruit healthcare professionals and patients  
23  
24 internationally to its online Delphi survey to prioritise potentially important outcomes. The results of  
25  
26 the Delphi survey will inform a consensus meeting to finalise the COS. A limitation of this present  
27  
28 interview study is a lack of international patient participation. Consequently, there may be outcomes  
29  
30 which are relevant to non-UK patients that have not been identified. Gastric cancer is an international  
31  
32 disease and cultural and regional influences may alter expectations and priorities of patients. Whilst  
33  
34 we have not identified evidence from COS developers in other fields that confirms these variations, it  
35  
36 remains a possibility. Our reasons for limiting the interviews to UK-only patients were primarily  
37  
38 down to pragmatism and finite resources. To mitigate this, the Delphi survey will be available in  
39  
40 several languages and during the first round, all participants will be able to submit additional  
41  
42 outcomes that they believe were omitted. These will be considered by the study team and presented  
43  
44 for prioritisation by participants in round two of the Delphi survey, if appropriate. Adopting this  
45  
46 approach also enables the exploration of regional variations in outcome priorities which may form the  
47  
48 basis of a future international qualitative study.  
49  
50  
51

52 In summary, this study identified 38 unique outcomes which are important to patients following  
53  
54 surgery for gastric cancer. Many of these outcomes are poorly represented by trials within this  
55  
56 research field. These outcomes will be added to other potentially important outcomes to be considered  
57  
58 for prioritisation by key stakeholders to develop a COS for surgical trials in gastric cancer.  
59  
60

## References

1. Fact Sheets by Cancer. [http://globocan.iarc.fr/Pages/fact\\_sheets\\_cancer.aspx](http://globocan.iarc.fr/Pages/fact_sheets_cancer.aspx). Accessed July 24, 2017.
2. Colquhoun A, Arnold M, Ferlay J, Goodman KJ, Forman D, Soerjomataram I. Global patterns of cardia and non-cardia gastric cancer incidence in 2012. *Gut*. 2015;64(12):1881-1888. doi:10.1136/gutjnl-2014-308915
3. Messenger M, de Steur WO, van Sandick JW, et al. Variations among 5 European countries for curative treatment of resectable oesophageal and gastric cancer: A survey from the EURECCA Upper GI Group (EUropean REgistration of Cancer CAre). *Eur J Surg Oncol*. 2016;42(1):116-122. doi:10.1016/j.ejso.2015.09.017
4. Michalowski J, Salvador A, Napper R. *Commissioned by Healthcare Quality Improvement Partnership National Oesophago-Gastric Cancer Audit 2018 An Audit of the Care Received by People with Oesophago-Gastric Cancer in England and Wales 2018 Annual Report.*; 2018.
5. Alkhaffaf B, Blazeby JM, Williamson PR, Bruce IA, Glennly A-M. Reporting of outcomes in gastric cancer surgery trials: a systematic review. *BMJ Open*. 2018;8(10):e021796. doi:10.1136/BMJOPEN-2018-021796
6. Alkhaffaf B, Glennly A-M, Blazeby JM, Williamson P, Bruce IA. Standardising the Reporting of Outcomes in Gastric Cancer Surgery Trials: Protocol for the Development of a Core Outcome Set and Accompanying Outcome Measurement Instrument Set (The GASTROS Study). *Trials*. 2017;18(1):370. doi:10.1186/s13063-017-2100-7
7. Williamson PR, Altman DG, Bagley H, et al. The COMET Handbook: version 1.0. *Trials*. 2017;18(S3):280. doi:10.1186/s13063-017-1978-4
8. Sanderson T, Morris M, Calnan M, Richards P, Hewlett S. What outcomes from pharmacologic treatments are important to people with rheumatoid arthritis? Creating the basis of a patient core set. *Arthritis Care Res (Hoboken)*. 2010;62(5):640-646.

- 1  
2  
3 doi:10.1002/acr.20034  
4  
5  
6 9. Allard A, Fellowes A, Shilling V, Janssens A, Beresford B, Morris C. Key health outcomes for  
7  
8 children and young people with neurodisability: qualitative research with young people and  
9  
10 parents. *BMJ Open*. 2014;4(4):e004611. doi:10.1136/bmjopen-2013-004611  
11  
12  
13 10. Arnold LM, Crofford LJ, Mease PJ, et al. Patient perspectives on the impact of fibromyalgia.  
14  
15 *Patient Educ Couns*. 2008;73(1):114-120. doi:10.1016/j.pec.2008.06.005  
16  
17  
18 11. Keeley T, Williamson P, Callery P, et al. The use of qualitative methods to inform Delphi  
19  
20 surveys in core outcome set development. *Trials*. 2016;17(1):230. doi:10.1186/s13063-016-  
21  
22 1356-7  
23  
24  
25 12. Corbin J, Strauss A. *Grounded Theory Research: Procedures, Canons, and Evaluative*  
26  
27 *Criteria*. Vol 13.; 1990.  
28  
29  
30 13. O'Brien BC, Harris IB, Beckman TJ, Reed DA, Cook DA. Standards for Reporting Qualitative  
31  
32 Research. *Acad Med*. 2014;89(9):1245-1251. doi:10.1097/ACM.0000000000000388  
33  
34  
35 14. McNair AGK, Brookes ST, Kinnersley P, Blazeby JM. What surgeons should tell patients with  
36  
37 oesophago-gastric cancer: A cross sectional study of information needs. *Eur J Surg Oncol*.  
38  
39 2013;39(11):1278-1286. doi:10.1016/J.EJSO.2013.08.005  
40  
41  
42 15. Avery KNL, Chalmers KA, Brookes ST, et al. Development of a Core Outcome Set for  
43  
44 Clinical Effectiveness Trials in Esophageal Cancer Resection Surgery. *Ann Surg*. March  
45  
46 2017;1. doi:10.1097/SLA.0000000000002204  
47  
48  
49  
50  
51  
52  
53  
54  
55  
56  
57  
58  
59  
60

### Author Statement

Author contributions to the study - <https://www.casrai.org/credit.html>.

| # | Role                          | Definition                                                                                                                                                                                                      | Authors             |
|---|-------------------------------|-----------------------------------------------------------------------------------------------------------------------------------------------------------------------------------------------------------------|---------------------|
| 1 | <b>Conceptualization</b>      | Ideas; formulation or evolution of overarching research goals and aims.                                                                                                                                         | BA, JMB,<br>IAB, RM |
| 2 | <b>Data curation</b>          | Management activities to annotate (produce metadata), scrub data and maintain research data (including software code, where it is necessary for interpreting the data itself) for initial use and later re-use. | BA                  |
| 3 | <b>Formal analysis</b>        | Application of statistical, mathematical, computational, or other formal techniques to analyse or synthesize study data.                                                                                        | BA, RM              |
| 4 | <b>Funding acquisition</b>    | Acquisition of the financial support for the project leading to this publication.                                                                                                                               | BA, JMB,<br>IAB     |
| 5 | <b>Investigation</b>          | Conducting a research and investigation process, specifically performing the experiments, or data/evidence collection.                                                                                          | BA, RM              |
| 6 | <b>Methodology</b>            | Development or design of methodology; creation of models.                                                                                                                                                       | BA, IAB,<br>RM      |
| 7 | <b>Project administration</b> | Management and coordination responsibility for the research activity planning and execution.                                                                                                                    | BA, IAB,<br>RM      |
| 8 | <b>Resources</b>              | Provision of study materials, reagents, materials, patients, laboratory samples, animals, instrumentation, computing resources, or other analysis tools.                                                        | BA, IAB             |
| 9 | <b>Software</b>               | Programming, software development; designing computer programs; implementation of the computer                                                                                                                  | BA                  |

|    |                                       |                                                                                                                                                                                                              |                     |
|----|---------------------------------------|--------------------------------------------------------------------------------------------------------------------------------------------------------------------------------------------------------------|---------------------|
|    |                                       | code and supporting algorithms; testing of existing code components.                                                                                                                                         |                     |
| 10 | <b>Supervision</b>                    | Oversight and leadership responsibility for the research activity planning and execution, including mentorship external to the core team.                                                                    | BA, JMB,<br>IAB, RM |
| 11 | <b>Validation</b>                     | Verification, whether as a part of the activity or separate, of the overall replication/reproducibility of results/experiments and other research outputs.                                                   | BA, RM              |
| 12 | <b>Visualization</b>                  | Preparation, creation and/or presentation of the published work, specifically visualization/data presentation.                                                                                               | BA, JMB,<br>IAB, RM |
| 13 | <b>Writing – original draft</b>       | Preparation, creation and/or presentation of the published work, specifically writing the initial draft (including substantive translation).                                                                 | BA                  |
| 14 | <b>Writing – review &amp; editing</b> | Preparation, creation and/or presentation of the published work by those from the original research group, specifically critical review, commentary or revision – including pre- or post-publication stages. | BA, JMB,<br>IAB, RM |

## Appendix 1. Development of themes

Theme: Surviving and Controlling Cancer

| Issues identified on initial coding         | Outcome              | Outcome theme                    |
|---------------------------------------------|----------------------|----------------------------------|
| Being cured of cancer                       | Recurrence of Cancer | Surviving and Controlling Cancer |
| Cancer returning to other parts of the body |                      |                                  |
| Cancer returning in the abdomen             |                      |                                  |
| Possibility of cancer returning             |                      |                                  |
| Being able to live (a little/a lot) longer  | Survival             |                                  |
| Being alive/surviving for a 'long time'     |                      |                                  |
| Chances of (not) dying from cancer          |                      |                                  |
| Chances of survival                         |                      |                                  |

Theme: Adverse events following surgery

| Issues identified on initial coding                                              | Outcome                          | Outcome theme                       |
|----------------------------------------------------------------------------------|----------------------------------|-------------------------------------|
| Complications related to anaesthesia                                             | Anaesthetic complications        | Adverse events following of Surgery |
| Anastomotic leak                                                                 | Anastomotic complications        |                                     |
| Anastomotic stricture                                                            |                                  |                                     |
| Internal bleeding requiring further intervention                                 | Bleeding                         |                                     |
| Concern about cardiac complications in context of previous myocardial infarction | Cardiac complications            |                                     |
| Racing heart beat                                                                |                                  |                                     |
| Stroke following surgery                                                         | Cerebro-vascular complications   |                                     |
| Bowel perforation                                                                | Intestinal complications         |                                     |
| Gastro-intestinal symptoms e.g. constipation                                     |                                  |                                     |
| Obstruction of bowel                                                             |                                  |                                     |
| Epidural related complications                                                   | Medication related complications |                                     |
| Hallucinations                                                                   |                                  |                                     |
| Overdose of medications such as morphine                                         |                                  |                                     |
| Side effects of sedatives                                                        |                                  |                                     |
| Drains and tubes to manage complications                                         | Need for re-intervention         |                                     |
| Endoscopic treatment of anastomotic stricture                                    |                                  |                                     |
| Requiring further surgery to manage complications                                |                                  |                                     |
|                                                                                  |                                  |                                     |

|                                                      |                           |  |
|------------------------------------------------------|---------------------------|--|
| Surgery for incisional hernia                        |                           |  |
| ‘Surviving’ surgery                                  |                           |  |
| Dying from a complication of surgery                 | Peri-operative death      |  |
| Dying on the operating table                         |                           |  |
| Hospital acquired pneumonia                          |                           |  |
| Pleural effusion                                     | Respiratory complications |  |
| Pneumothorax                                         |                           |  |
| Re-admission due to complications such as infections | Re-admission to hospital  |  |
| Re-admission due to pain                             |                           |  |
| Wound dehiscence                                     |                           |  |
| Wound infection                                      | Wound complications       |  |
| Wound leak                                           |                           |  |
| Wound numbness                                       |                           |  |
| Catheter-related problems                            | Urinary complications     |  |

Theme: Long-term impact of surgery

| Issues identified on initial coding                        | Outcome                   | Outcome theme               |
|------------------------------------------------------------|---------------------------|-----------------------------|
| Being able to enjoy a good quality of life                 |                           |                             |
| Uncertainty as to what life will be like following surgery | Overall ‘quality of life’ |                             |
| Changes in mood                                            |                           |                             |
| Clinical depression                                        |                           |                             |
| Feeling ‘abnormal’ and ‘different’ to others               | Psychological impact      |                             |
| Feelings of insecurity                                     |                           |                             |
| Feelings of isolation                                      |                           |                             |
| Issues related to body image                               |                           | Long-term impact of surgery |
| Low mood                                                   |                           |                             |
| Being able to enjoy eating again                           |                           |                             |
| Being able to exercise again                               |                           |                             |
| Being able to interact and socialise with others           | Returning to ‘normality’  |                             |
| Being able to live ‘as they did before’                    |                           |                             |
| Being able to rely on oneself to undertake tasks           |                           |                             |
| Being able to undertake household activities               |                           |                             |



|                                |  |  |
|--------------------------------|--|--|
| such as shopping and gardening |  |  |
| Returning to employment        |  |  |

Theme: Technical aspects of surgery

| Issues identified on initial coding               | Outcome                      | Outcome theme                |
|---------------------------------------------------|------------------------------|------------------------------|
| 'Cutting' the cancer out                          | Complete resection of cancer | Technical aspects of surgery |
| Ensuring no cancer is left behind                 |                              |                              |
| Getting 'rid' of the cancer                       |                              |                              |
| Inability to resect cancer at surgery             |                              |                              |
| Removing all lymph nodes                          |                              |                              |
| Removing spleen if necessary                      | Size of incisions            |                              |
| Ability to perform laparoscopic 'keyhole' surgery |                              |                              |
| Large scars                                       |                              |                              |
| Duration of surgery                               | Duration of surgery          |                              |

Theme: Long-term problems following surgery

| Issues identified on initial coding                  | Outcome                    | Outcome theme                        |                                      |
|------------------------------------------------------|----------------------------|--------------------------------------|--------------------------------------|
| Amounts able to eat and drink                        | Eating and Drinking        | Long-term problems following surgery |                                      |
| Being able to eat 'properly'                         |                            |                                      |                                      |
| Being able to eat at home                            |                            |                                      |                                      |
| Change in diet and types of food patient can consume |                            |                                      |                                      |
| Difficulties swallowing                              |                            |                                      |                                      |
| Requirement for ongoing nutritional support          | Nutritional problems       | Long-term problems following surgery |                                      |
| Vitamin B12 deficiency                               |                            |                                      |                                      |
| Feeling persistently tired                           | Fatigue                    |                                      | Long-term problems following surgery |
| Feeling extremely weak/lethargic/tired               |                            |                                      |                                      |
| Having no energy or stamina                          |                            |                                      |                                      |
| Loss of energy following simple tasks                |                            |                                      |                                      |
| Abdominal bloating                                   | Gastro-intestinal symptoms | Long-term problems following surgery |                                      |
| Belching                                             |                            |                                      |                                      |
| Diarrhoea                                            |                            |                                      |                                      |
| Dumping syndrome                                     |                            |                                      |                                      |
| Excessive flatus                                     |                            |                                      |                                      |
| Nausea                                               |                            |                                      |                                      |

|                                             |                 |  |
|---------------------------------------------|-----------------|--|
| Reflux symptoms (acid or bile)              |                 |  |
| Vomiting                                    |                 |  |
| Abdominal pain or cramps                    | Chronic Pain    |  |
| Headaches and migraines                     |                 |  |
| Long-term wound related pain                |                 |  |
| Muscle cramps                               |                 |  |
| Pain on swallowing                          |                 |  |
| Painful abdominal distension or bloating    |                 |  |
| Inability to regain weight to desired level | Weight problems |  |
| Readjusting to new weight                   |                 |  |
| Speed of weight loss                        |                 |  |
| Weight loss in general                      |                 |  |

Theme: Recovery Following surgery

| Issues identified on initial coding                                        | Outcome                             | Outcome theme              |
|----------------------------------------------------------------------------|-------------------------------------|----------------------------|
| Post-operative plan for physiotherapy                                      | Ambulation                          | Recovery following surgery |
| Restricted mobility due to drains and tubes attached                       |                                     |                            |
| Time to be able to undertake tasks such as standing up, walking or bathing |                                     |                            |
| Time before being allowed to eat and drink                                 | Return of gastrointestinal function |                            |
| Time before bowel function returned                                        |                                     |                            |
| Concern about being too unwell for further chemotherapy                    | Ability to have more chemotherapy   |                            |
| Length of time in hospital                                                 | Duration of hospital stay           |                            |
| Length of time in intensive care                                           |                                     |                            |
| Length of time in pain                                                     | Post-operative pain                 |                            |
| Patterns of pain                                                           |                                     |                            |
| Requirement for analgesia                                                  |                                     |                            |
| Severity of pain                                                           |                                     |                            |

### Appendix 1. Summary of outcomes and outcome themes identified from interviews.

| Outcome Theme                                                                                                                                                             | Outcome                               | How many interviews outcome was referenced in | Total number of references in all interviews |
|---------------------------------------------------------------------------------------------------------------------------------------------------------------------------|---------------------------------------|-----------------------------------------------|----------------------------------------------|
| <b>Surviving and controlling cancer</b> <ul style="list-style-type: none"> <li>• Referenced in 20 interviews</li> <li>• Referenced 90 times in all interviews.</li> </ul> | Curing Cancer                         | 4                                             | 6                                            |
|                                                                                                                                                                           | Recurrence of Cancer                  | 18                                            | 28                                           |
|                                                                                                                                                                           | Survival                              | 20                                            | 56                                           |
| <b>Technical aspects of surgery</b> <ul style="list-style-type: none"> <li>• Referenced in 18 interviews</li> <li>• Referenced 52 times in all interviews.</li> </ul>     | Complete Excision of Cancer           | 18                                            | 52                                           |
|                                                                                                                                                                           | Excision of Lymph Nodes               | 5                                             | 5                                            |
|                                                                                                                                                                           | Need for splenectomy                  | 1                                             | 1                                            |
|                                                                                                                                                                           | Operative time                        | 1                                             | 2                                            |
|                                                                                                                                                                           | Wound Size                            | 7                                             | 11                                           |
| <b>Adverse events</b> <ul style="list-style-type: none"> <li>• Referenced in 20 interviews</li> <li>• Referenced 97 times in all interviews.</li> </ul>                   | Ability to have adjuvant chemotherapy | 1                                             | 1                                            |
|                                                                                                                                                                           | Anaesthetic Complications             | 1                                             | 1                                            |
|                                                                                                                                                                           | Anastomotic Leak                      | 6                                             | 9                                            |
|                                                                                                                                                                           | Anastomotic Stricture                 | 1                                             | 1                                            |
|                                                                                                                                                                           | B12 Deficiency                        | 5                                             | 5                                            |
|                                                                                                                                                                           | Bleeding                              | 1                                             | 2                                            |
|                                                                                                                                                                           | Cardiac Complications                 | 2                                             | 2                                            |
|                                                                                                                                                                           | Catheter related complications        | 1                                             | 1                                            |
|                                                                                                                                                                           | Cerebro-vascular complications        | 1                                             | 1                                            |
|                                                                                                                                                                           | Gastrointestinal problems             | 1                                             | 1                                            |
|                                                                                                                                                                           | Hernia                                | 1                                             | 1                                            |
|                                                                                                                                                                           | Intestinal complications              | 4                                             | 10                                           |
|                                                                                                                                                                           | Medication-related complications      | 10                                            | 12                                           |
| Need for reintervention                                                                                                                                                   | 8                                     | 13                                            |                                              |

|                                                                                                                                    |                                  |    |    |
|------------------------------------------------------------------------------------------------------------------------------------|----------------------------------|----|----|
|                                                                                                                                    | Peri-operative death             | 12 | 20 |
|                                                                                                                                    | Re-Admission to Hospital         | 3  | 4  |
|                                                                                                                                    | Respiratory complications        | 3  | 3  |
|                                                                                                                                    | Wound Complications              | 8  | 10 |
| <b>Recovery from surgery</b>                                                                                                       | In Hospital Recovery             | 11 | 23 |
|                                                                                                                                    | Length of Stay Following Surgery | 11 | 18 |
| <ul style="list-style-type: none"> <li>• Referenced in 18 interviews</li> <li>• Referenced 57 times in all interviews.</li> </ul>  | Peripheral Oedema                | 1  | 1  |
| <b>Long-terms problems following surgery</b>                                                                                       | Eating & Drinking                | 20 | 75 |
|                                                                                                                                    | Fatigue                          | 16 | 38 |
|                                                                                                                                    | Gastrointestinal symptoms        | 11 | 27 |
| <ul style="list-style-type: none"> <li>• Referenced in 20 interviews</li> <li>• Referenced 175 times in all interviews.</li> </ul> | Pain                             | 10 | 14 |
|                                                                                                                                    | Weight Loss                      | 12 | 21 |
| <b>Long-term impacts of surgery</b>                                                                                                | Necessity of long-term feeding   | 1  | 1  |
|                                                                                                                                    | Overall QoL                      | 8  | 10 |
| <ul style="list-style-type: none"> <li>• Referenced in 20 interviews</li> <li>• Referenced 133 times in all interviews.</li> </ul> | Psychological impact             | 11 | 40 |
|                                                                                                                                    | Returning to normality           | 20 | 82 |

# Reporting checklist for qualitative study.

Based on the SRQR guidelines.

## Instructions to authors

Complete this checklist by entering the page numbers from your manuscript where readers will find each of the items listed below.

Your article may not currently address all the items on the checklist. Please modify your text to include the missing information. If you are certain that an item does not apply, please write "n/a" and provide a short explanation.

Upload your completed checklist as an extra file when you submit to a journal.

In your methods section, say that you used the SRQR reporting guidelines, and cite them as:

O'Brien BC, Harris IB, Beckman TJ, Reed DA, Cook DA. Standards for reporting qualitative research: a synthesis of recommendations. *Acad Med.* 2014;89(9):1245-1251.

|                     | Reporting Item                                                                                                                                                                                                                                          | Page Number |
|---------------------|---------------------------------------------------------------------------------------------------------------------------------------------------------------------------------------------------------------------------------------------------------|-------------|
| <b>Title</b>        |                                                                                                                                                                                                                                                         |             |
|                     | <a href="#">#1</a> Concise description of the nature and topic of the study identifying the study as qualitative or indicating the approach (e.g. ethnography, grounded theory) or data collection methods (e.g. interview, focus group) is recommended | 1           |
| <b>Abstract</b>     |                                                                                                                                                                                                                                                         |             |
|                     | <a href="#">#2</a> Summary of the key elements of the study using the abstract format of the intended publication; typically includes background, purpose, methods, results and conclusions                                                             | 4           |
| <b>Introduction</b> |                                                                                                                                                                                                                                                         |             |
| Problem formulation | <a href="#">#3</a> Description and significance of the problem / phenomenon studied: review of relevant theory and empirical work; problem statement                                                                                                    | 7           |

|    |                              |                     |                                                           |    |
|----|------------------------------|---------------------|-----------------------------------------------------------|----|
| 1  | Purpose or research          | <a href="#">#4</a>  | Purpose of the study and specific objectives or           | 7  |
| 2  | question                     |                     | questions                                                 |    |
| 3  |                              |                     |                                                           |    |
| 4  | <b>Methods</b>               |                     |                                                           |    |
| 5  |                              |                     |                                                           |    |
| 6  |                              |                     |                                                           |    |
| 7  | Qualitative approach and     | <a href="#">#5</a>  | Qualitative approach (e.g. ethnography, grounded          | 9  |
| 8  | research paradigm            |                     | theory, case study, phenomenology, narrative research)    |    |
| 9  |                              |                     | and guiding theory if appropriate; identifying the        |    |
| 10 |                              |                     | research paradigm (e.g. postpositivist, constructivist /  |    |
| 11 |                              |                     | interpretivist) is also recommended; rationale. The       |    |
| 12 |                              |                     | rationale should briefly discuss the justification for    |    |
| 13 |                              |                     | choosing that theory, approach, method or technique       |    |
| 14 |                              |                     | rather than other options available; the assumptions      |    |
| 15 |                              |                     | and limitations implicit in those choices and how those   |    |
| 16 |                              |                     | choices influence study conclusions and transferability.  |    |
| 17 |                              |                     | As appropriate the rationale for several items might be   |    |
| 18 |                              |                     | discussed together.                                       |    |
| 19 |                              |                     |                                                           |    |
| 20 |                              |                     |                                                           |    |
| 21 |                              |                     |                                                           |    |
| 22 |                              |                     |                                                           |    |
| 23 |                              |                     |                                                           |    |
| 24 |                              |                     |                                                           |    |
| 25 |                              |                     |                                                           |    |
| 26 | Researcher characteristics   | <a href="#">#6</a>  | Researchers' characteristics that may influence the       | 10 |
| 27 | and reflexivity              |                     | research, including personal attributes, qualifications / |    |
| 28 |                              |                     | experience, relationship with participants, assumptions   |    |
| 29 |                              |                     | and / or presuppositions; potential or actual interaction |    |
| 30 |                              |                     | between researchers' characteristics and the research     |    |
| 31 |                              |                     | questions, approach, methods, results and / or            |    |
| 32 |                              |                     | transferability                                           |    |
| 33 |                              |                     |                                                           |    |
| 34 |                              |                     |                                                           |    |
| 35 |                              |                     |                                                           |    |
| 36 |                              |                     |                                                           |    |
| 37 | Context                      | <a href="#">#7</a>  | Setting / site and salient contextual factors; rationale  | 10 |
| 38 |                              |                     |                                                           |    |
| 39 |                              |                     |                                                           |    |
| 40 | Sampling strategy            | <a href="#">#8</a>  | How and why research participants, documents, or          | 9  |
| 41 |                              |                     | events were selected; criteria for deciding when no       |    |
| 42 |                              |                     | further sampling was necessary (e.g. sampling             |    |
| 43 |                              |                     | saturation); rationale                                    |    |
| 44 |                              |                     |                                                           |    |
| 45 |                              |                     |                                                           |    |
| 46 | Ethical issues pertaining to | <a href="#">#9</a>  | Documentation of approval by an appropriate ethics        | 11 |
| 47 | human subjects               |                     | review board and participant consent, or explanation for  |    |
| 48 |                              |                     | lack thereof; other confidentiality and data security     |    |
| 49 |                              |                     | issues                                                    |    |
| 50 |                              |                     |                                                           |    |
| 51 |                              |                     |                                                           |    |
| 52 |                              |                     |                                                           |    |
| 53 | Data collection methods      | <a href="#">#10</a> | Types of data collected; details of data collection       | 10 |
| 54 |                              |                     | procedures including (as appropriate) start and stop      |    |
| 55 |                              |                     | dates of data collection and analysis, iterative process, |    |
| 56 |                              |                     | triangulation of sources / methods, and modification of   |    |
| 57 |                              |                     |                                                           |    |
| 58 |                              |                     |                                                           |    |
| 59 |                              |                     |                                                           |    |
| 60 |                              |                     |                                                           |    |

|    |                              |                                                                           |    |
|----|------------------------------|---------------------------------------------------------------------------|----|
| 1  |                              | procedures in response to evolving study findings;                        |    |
| 2  |                              | rationale                                                                 |    |
| 3  |                              |                                                                           |    |
| 4  | Data collection              | <a href="#">#11</a> Description of instruments (e.g. interview guides,    | 11 |
| 5  | instruments and              | questionnaires) and devices (e.g. audio recorders)                        |    |
| 6  | technologies                 | used for data collection; if / how the instruments(s)                     |    |
| 7  |                              | changed over the course of the study                                      |    |
| 8  |                              |                                                                           |    |
| 9  |                              |                                                                           |    |
| 10 | Units of study               | <a href="#">#12</a> Number and relevant characteristics of participants,  | 16 |
| 11 |                              | documents, or events included in the study; level of                      |    |
| 12 |                              | participation (could be reported in results)                              |    |
| 13 |                              |                                                                           |    |
| 14 |                              |                                                                           |    |
| 15 |                              |                                                                           |    |
| 16 | Data processing              | <a href="#">#13</a> Methods for processing data prior to and during       | 11 |
| 17 |                              | analysis, including transcription, data entry, data                       |    |
| 18 |                              | management and security, verification of data integrity,                  |    |
| 19 |                              | data coding, and anonymisation / deidentification of                      |    |
| 20 |                              | excerpts                                                                  |    |
| 21 |                              |                                                                           |    |
| 22 |                              |                                                                           |    |
| 23 |                              |                                                                           |    |
| 24 | Data analysis                | <a href="#">#14</a> Process by which inferences, themes, etc. were        | 11 |
| 25 |                              | identified and developed, including the researchers                       |    |
| 26 |                              | involved in data analysis; usually references a specific                  |    |
| 27 |                              | paradigm or approach; rationale                                           |    |
| 28 |                              |                                                                           |    |
| 29 |                              |                                                                           |    |
| 30 |                              |                                                                           |    |
| 31 | Techniques to enhance        | <a href="#">#15</a> Techniques to enhance trustworthiness and credibility | 11 |
| 32 | trustworthiness              | of data analysis (e.g. member checking, audit trail,                      |    |
| 33 |                              | triangulation); rationale                                                 |    |
| 34 |                              |                                                                           |    |
| 35 |                              |                                                                           |    |
| 36 | <b>Results/findings</b>      |                                                                           |    |
| 37 |                              |                                                                           |    |
| 38 |                              |                                                                           |    |
| 39 | Syntheses and                | <a href="#">#16</a> Main findings (e.g. interpretations, inferences, and  | 16 |
| 40 | interpretation               | themes); might include development of a theory or                         |    |
| 41 |                              | model, or integration with prior research or theory                       |    |
| 42 |                              |                                                                           |    |
| 43 |                              |                                                                           |    |
| 44 | Links to empirical data      | <a href="#">#17</a> Evidence (e.g. quotes, field notes, text excerpts,    | 16 |
| 45 |                              | photographs) to substantiate analytic findings                            |    |
| 46 |                              |                                                                           |    |
| 47 |                              |                                                                           |    |
| 48 | <b>Discussion</b>            |                                                                           |    |
| 49 |                              |                                                                           |    |
| 50 | Intergration with prior      | <a href="#">#18</a> Short summary of main findings; explanation of how    | 29 |
| 51 | work, implications,          | findings and conclusions connect to, support, elaborate                   |    |
| 52 | transferability and          | on, or challenge conclusions of earlier scholarship;                      |    |
| 53 | contribution(s) to the field | discussion of scope of application / generalizability;                    |    |
| 54 |                              | identification of unique contributions(s) to scholarship in               |    |
| 55 |                              | a discipline or field                                                     |    |
| 56 |                              |                                                                           |    |
| 57 |                              |                                                                           |    |
| 58 |                              |                                                                           |    |
| 59 |                              |                                                                           |    |
| 60 |                              |                                                                           |    |

|    |                       |                     |                                                          |    |
|----|-----------------------|---------------------|----------------------------------------------------------|----|
| 1  | Limitations           | <a href="#">#19</a> | Trustworthiness and limitations of findings              | 30 |
| 2  |                       |                     |                                                          |    |
| 3  | <b>Other</b>          |                     |                                                          |    |
| 4  |                       |                     |                                                          |    |
| 5  | Conflicts of interest | <a href="#">#20</a> | Potential sources of influence of perceived influence on | 3  |
| 6  |                       |                     | study conduct and conclusions; how these were            |    |
| 7  |                       |                     | managed                                                  |    |
| 8  |                       |                     |                                                          |    |
| 9  |                       |                     |                                                          |    |
| 10 |                       |                     |                                                          |    |
| 11 | Funding               | <a href="#">#21</a> | Sources of funding and other support; role of funders in | 2  |
| 12 |                       |                     | data collection, interpretation and reporting            |    |
| 13 |                       |                     |                                                          |    |
| 14 |                       |                     |                                                          |    |

15 The SRQR checklist is distributed with permission of Wolters Kluwer © 2014 by the Association of  
16 American Medical Colleges. This checklist was completed on 05. October 2019 using  
17 <https://www.goodreports.org/>, a tool made by the [EQUATOR Network](#) in collaboration with  
18 [Penelope.ai](#)  
19  
20  
21  
22  
23  
24  
25  
26  
27  
28  
29  
30  
31  
32  
33  
34  
35  
36  
37  
38  
39  
40  
41  
42  
43  
44  
45  
46  
47  
48  
49  
50  
51  
52  
53  
54  
55  
56  
57  
58  
59  
60



# BMJ Open

## Patient Priorities in Relation to Surgery for Gastric Cancer: Qualitative Interviews with Gastric Cancer Surgery Patients to Inform the Development of a Core Outcome Set.

|                                 |                                                                                                                                                                                                                                                                                                                                                                                                                                                                                |
|---------------------------------|--------------------------------------------------------------------------------------------------------------------------------------------------------------------------------------------------------------------------------------------------------------------------------------------------------------------------------------------------------------------------------------------------------------------------------------------------------------------------------|
| Journal:                        | <i>BMJ Open</i>                                                                                                                                                                                                                                                                                                                                                                                                                                                                |
| Manuscript ID                   | bmjopen-2019-034782.R1                                                                                                                                                                                                                                                                                                                                                                                                                                                         |
| Article Type:                   | Original research                                                                                                                                                                                                                                                                                                                                                                                                                                                              |
| Date Submitted by the Author:   | 10-Dec-2019                                                                                                                                                                                                                                                                                                                                                                                                                                                                    |
| Complete List of Authors:       | Alkhaffaf, Bilal; Salford Royal NHS Foundation Trust, Department of Oesophago-Gastric Surgery; The University of Manchester, Division of Cancer Sciences, School of Medical Sciences, Faculty of Biology, Medicine and Health,<br>Blazeby, Jane; University of Bristol, Department of Social Medicine<br>Bruce, Iain; Manchester University Hospitals NHS Foundation Trust, Paediatric ENT Department<br>Morris, Rebecca L.; University of Manchester, Centre for Primary Care |
| <b>Primary Subject Heading</b>: | Surgery                                                                                                                                                                                                                                                                                                                                                                                                                                                                        |
| Secondary Subject Heading:      | Oncology                                                                                                                                                                                                                                                                                                                                                                                                                                                                       |
| Keywords:                       | Adult surgery < SURGERY, Gastrointestinal tumours < ONCOLOGY, ONCOLOGY, SURGERY                                                                                                                                                                                                                                                                                                                                                                                                |
|                                 |                                                                                                                                                                                                                                                                                                                                                                                                                                                                                |

SCHOLARONE™  
Manuscripts



I, the Submitting Author has the right to grant and does grant on behalf of all authors of the Work (as defined in the below author licence), an exclusive licence and/or a non-exclusive licence for contributions from authors who are: i) UK Crown employees; ii) where BMJ has agreed a CC-BY licence shall apply, and/or iii) in accordance with the terms applicable for US Federal Government officers or employees acting as part of their official duties; on a worldwide, perpetual, irrevocable, royalty-free basis to BMJ Publishing Group Ltd ("BMJ") its licensees and where the relevant Journal is co-owned by BMJ to the co-owners of the Journal, to publish the Work in this journal and any other BMJ products and to exploit all rights, as set out in our [licence](#).

The Submitting Author accepts and understands that any supply made under these terms is made by BMJ to the Submitting Author unless you are acting as an employee on behalf of your employer or a postgraduate student of an affiliated institution which is paying any applicable article publishing charge ("APC") for Open Access articles. Where the Submitting Author wishes to make the Work available on an Open Access basis (and intends to pay the relevant APC), the terms of reuse of such Open Access shall be governed by a Creative Commons licence – details of these licences and which [Creative Commons](#) licence will apply to this Work are set out in our licence referred to above.

Other than as permitted in any relevant BMJ Author's Self Archiving Policies, I confirm this Work has not been accepted for publication elsewhere, is not being considered for publication elsewhere and does not duplicate material already published. I confirm all authors consent to publication of this Work and authorise the granting of this licence.

1  
2  
3  
4 Title Page

5  
6 **Patient Priorities in Relation to Surgery for Gastric Cancer: Qualitative Interviews with Gastric**  
7  
8 **Cancer Surgery Patients to Inform the Development of a Core Outcome Set.**  
9

10  
11  
12  
13  
14 **Authors**

15  
16 Bilal Alkhaffaf<sup>1,2,3</sup>, Jane Blazeby<sup>4</sup>, Iain A Bruce<sup>5,6</sup> Rebecca Morris<sup>7</sup>.

17  
18  
19 **Affiliations**

20  
21  
22 <sup>1</sup>Department of Oesophago-Gastric Surgery, Manchester Royal Infirmary, Manchester University  
23 Hospitals NHS foundation Trust, Manchester, UK

24  
25  
26  
27 <sup>2</sup>Department of Oesophago-Gastric Surgery, Salford Royal Hospital, Salford Royal NHS foundation  
28 Trust, Manchester, UK

29  
30  
31  
32 <sup>3</sup>Division of Cancer Sciences, School of Medical Sciences, Faculty of Biology, Medicine and Health,  
33 University of Manchester, UK

34  
35  
36  
37 <sup>4</sup>Centre for Surgical Research and Bristol NIHR Biomedical Research Centre, University of Bristol,  
38 UK

39  
40  
41  
42 <sup>5</sup> Paediatric ENT Department, Royal Manchester Children's Hospital, Manchester University NHS  
43 Foundation Trust, Manchester Academic Health Science Centre, Manchester, UK

44  
45  
46  
47 <sup>6</sup> Division of Infection, Immunity and Respiratory Medicine, Faculty of Biology, Medicine and  
48 Health, University of Manchester, UK

49  
50  
51  
52 <sup>7</sup>NIHR Greater Manchester Patient Safety Translational Research Centre, Division of Population  
53 Health, Health Services Research & Primary Care, University of Manchester, Manchester, UK  
54  
55  
56  
57  
58  
59  
60

**Corresponding Author**

Mr Bilal Alkhaffaf

Consultant Oesophago-Gastric Surgeon

Salford Royal Hospitals NHS Foundation Trust

Stott Lane

Salford

M6 8HD

E-mail: [bilal.alkhaffaf@srft.nhs.uk](mailto:bilal.alkhaffaf@srft.nhs.uk)

Telephone: +44 161 206 0449

**Author E-mail Addresses**

Jane Blazeby – [j.m.blazeby@bristol.ac.uk](mailto:j.m.blazeby@bristol.ac.uk)

Iain A Bruce – [iain.bruce@mft.nhs.uk](mailto:iain.bruce@mft.nhs.uk)

Rebecca Morris – [rebecca.morris@manchester.ac.uk](mailto:rebecca.morris@manchester.ac.uk)

**Original manuscript date:** 05/10/2019

**Revised manuscript date :** 07/12/2019

**Reprints**

Reprints will not be available from the authors.

**Funding**

This study is funded by the National Institute for Health Research (NIHR) Doctoral Research Fellowship Grant (DRF-2015-08-023). JMB is partially funded by the NIHR Bristol Biomedical Research Centre

## Conflicts of Interest

The authors report no conflicts of interest.

## Disclaimer

This paper presents independent research funded by the National Institute for Health Research (NIHR). The views expressed are those of the author(s) and not necessarily those of the NHS, the NIHR or the Department of Health.

## Data Availability

Data are available upon reasonable request.

## Acknowledgements

The authors would like to thank all those who participated in this study. The authors would also like to highlight the role undertaken by Dr Aleksandra Metryka, Senior Clinical Trials Coordinator, who facilitated the running of the study.

## Author Contributorship Statement

Conceptualization - BA, JMB, IAB, RM; Data curation - BA; Formal analysis - BA, RM; Funding acquisition - BA, JMB, IAB; Investigation - BA, RM; Methodology - BA, IAB, RM; Project administration - BA, IAB, RM; Resources - BA, IAB; Software – BA; Supervision - JMB, IAB, RM; Validation - BA, RM; Visualization - BA, JMB, IAB, RM; Writing (original draft) - BA; Writing (review & editing) - BA, JMB, IAB, RM.

## Running Title

Patient Priorities Following Surgery for Gastric Cancer

**Word Count:** 5660

**Number of tables:** 3

**Number of appendices:** 2

## Structured Abstract

### **Objective**

The reporting of outcomes in surgical trials for gastric cancer is inconsistent. The GASTROS study (GAstric Cancer Surgery TRials Reported Outcome Standardisation) aims to address this by developing a core outcome set (COS) for use in all future trials within this field. A COS should reflect the views of all stakeholders, including patients. We undertook a series of interviews to identify outcomes important to patients which would be considered for inclusion in a COS.

### **Setting**

All interviews took place within the United Kingdom. Interviews were carried out face-to-face at hospitals and cancer support centres or via the telephone.

### **Participants**

Twenty participants at varying stages of recovery following surgery for gastric cancer with curative intent.

### **Design**

Qualitative design using semi-structured interviews, supported by an interview guide which was iteratively modified; thematic analysis was used to explore patient priorities.

### **Results**

Six themes enveloping 38 outcomes were identified; surviving and controlling cancer, technical aspects of surgery, adverse events from surgery, recovering from surgery, long-term problems following surgery and long-term life impact of surgery. The 'most important' patient priority was to be 'cured of cancer'.

### **Conclusion**

Surgical trials for gastric cancer should consider broader priorities of patients when choosing which outcomes to report. This study highlighted the importance of longer-term outcomes such as cancer

1  
2  
3 survival. Outcomes identified in this study will be used to inform an international Delphi survey to  
4  
5 develop a COS in this field.  
6  
7

8 **KEYWORDS:**  
9

10 Surgical Oncology  
11  
12

13 Stomach Neoplasms  
14  
15

16 Outcome Assessment  
17  
18

19 Patient Reported Outcome Measures  
20  
21

22 Treatment Outcome  
23  
24

25 Outcome reporting  
26  
27  
28  
29  
30  
31  
32  
33  
34  
35  
36  
37  
38  
39  
40  
41  
42  
43  
44  
45  
46  
47  
48  
49  
50  
51  
52  
53  
54  
55  
56  
57  
58  
59  
60

## Article Summary

### Strengths and Limitations of This Study

- This is the first in-depth qualitative study to examine the priorities and experiences of patients following potentially curative surgery for gastric cancer, and the first to establish which outcomes are important to patients.
- The study forms part of a larger project (The GASTROS Study - [www.gastrosstudy.org](http://www.gastrosstudy.org)) to develop a 'core outcome set' (COS) for use in surgical trials for gastric cancer and was reviewed and funded by the National Institute of Health Research (UK). The study is based on a reproducible and transparent methodology which has been subjected to critical appraisal during a peer-review process.
- The term 'outcome' was described to participants in a manner relatable to them, such that they understood it and were able to identify which outcomes were most important.
- The patient population was limited to UK-based English speakers. The views of international patients may vary due to differences in culture and clinical practice.



## Main Article

### Introduction

### Background

Gastric cancer is a leading cause of cancer-related death world-wide<sup>1,2</sup>. Whilst surgery remains the only treatment which can offer a potential cure from this disease, it is associated with significant rates of morbidity in both the short and long-term<sup>3,4</sup>. Ideally, the optimal surgical approach would minimise the risk of short and long-term complications without jeopardising the oncological resection.

Identifying the optimal surgical approach for gastric cancer should be based on comparing and combining robust clinical evidence from well-designed randomised control trials. One of the present challenges to achieving this is the inconsistency in the reporting of outcomes in this field<sup>5</sup>. This limits evidence synthesis and contributes to 'research waste'. The GASTROS study (GASTROS – **G**Ast<sup>r</sup>ic **C**ancer **S**urgery **T**Rials **R**eported **O**utcome **S**tandardisation - [www.gastrosstudy.org](http://www.gastrosstudy.org))<sup>6</sup> aims to address this issue by developing a 'core outcome set' (COS) – a *minimum* group of standardized and well-defined outcomes, measured by all future gastric cancer surgery trials<sup>7</sup>.

A guiding principle in the development of COS is that outcomes reflect the views and priorities of key stakeholders, including patients, to maximise the relevance and impact of future research. Previous studies have demonstrated variations in the views and priorities of clinicians and patients<sup>8-10</sup>, which can result in trials reporting outcomes which bear little relevance to patients. A systematic review of outcome reporting in surgical trials for gastric cancer has demonstrated that outcomes which may be important to gastric cancer patients, such as 'quality of life' after surgery are poorly represented within this field<sup>5</sup>. It is therefore important to understand which outcomes are important for patients undergoing gastric cancer surgery.

### Objective

This research forms part of the GASTROS study, for which the protocol has been previously described<sup>6</sup>. The first stage in the study involves identifying a 'long-list' of potentially important outcomes which will be prioritised in stage two by participants undertaking a Delphi survey. It is not

1  
2  
3 known to what degree outcomes reported in previously published trials represent the priorities of  
4 patients undergoing gastric cancer surgery, and as such, solely relying on these as a source to populate  
5 the 'long-list' may overlook potentially important outcomes. By exploring the experiences,  
6 perceptions and priorities of patients who have undergone surgery for gastric cancer, this study aimed  
7 to identify outcomes which may not have been previously reported in the literature.  
8  
9  
10  
11  
12  
13  
14  
15  
16  
17  
18  
19  
20  
21  
22  
23  
24  
25  
26  
27  
28  
29  
30  
31  
32  
33  
34  
35  
36  
37  
38  
39  
40  
41  
42  
43  
44  
45  
46  
47  
48  
49  
50  
51  
52  
53  
54  
55  
56  
57  
58  
59  
60

For peer review only

## Methods

### Study Design

The role of qualitative research methods in the development of COS has been previously explored<sup>11</sup> and has been advocated by groups such as the COMET initiative<sup>7</sup> as one of several approaches to ensure that outcome lists being considered for prioritisation are exhaustive. This qualitative study used a semi-structured interview approach to achieve the primary objective of identifying outcomes of importance to patients. A series of open questions were used to facilitate a patient-led discussion, guided by additional prompts from a pre-prepared interview schedule (table 1) to ensure key areas were covered.

Additional focused questioning around the use of outcomes in research was also included. In the context of clinical research, terms such as ‘outcomes’ may not be well understood by patients<sup>11</sup> and so a mixture of open and closed questioning was important. Participant interviews were undertaken in series of three following which transcript analysis (see below) was undertaken and the interview schedule was modified iteratively. This ensured that areas raised by earlier participants, but not included in the original schedule, were covered in subsequent discussions.

### Sampling

The eligibility criteria for this study are summarized in table 2. A purposive sampling strategy was adopted across the following characteristics:

- Age (above and below 70 years).
- Gender (men and women)
- Time since surgery (less than a year, one to three years and more than three years)

Interviews were undertaken until ‘data-saturation’ was achieved. Data saturation was determined when there was no new data emerging that had interpretive value.

Participants were recruited from across the United Kingdom from three sources:

- 1  
2  
3 1. A regional specialist gastric cancer centre: patients were approached in the outpatient clinic  
4  
5 by their direct care team.  
6
- 7 2. Patient organisations: patient groups were asked to contact their membership through e-mail  
8  
9 and social media.  
10
- 11 3. Snowball sampling; patients who had been recruited or contacted to participate were asked to  
12  
13 identify other patients who would be interested in the study.  
14  
15  
16  
17

### 18 Data Collection

19  
20 Interviews were undertaken between February and May 2017 and were conducted by BA, a  
21  
22 consultant surgeon and researcher with approximately ten years' experience of managing and  
23  
24 communicating with gastric cancer patients. Participants were invited to choose between a University  
25  
26 Teaching Hospital, two purpose-built patient cancer centres, or their home for the location of the  
27  
28 meeting. Participants were also offered the opportunity to have their interviews over the telephone.  
29  
30 Participants were offered travel expenses to minimise any financial burden on taking part in the study.  
31  
32

33 In addition to the purposive sampling strategy, the following demographic data was collected:

- 34 • Gender (male/female)
- 35
- 36 • Social circumstances (e.g. lives alone/with partner/lives with dependents)
- 37
- 38 • Age
- 39
- 40 • Time since surgery (in months)
- 41
- 42 • The type of gastrectomy (total or partial gastrectomy)
- 43
- 44 • The approach to their surgery (open or laparoscopic)
- 45
- 46 • Whether they had undergone additional treatment (e.g. chemotherapy)
- 47
- 48 • Whether they had suffered a post-operative complication
- 49
- 50 • Ethnicity
- 51
- 52 • Previous trial enrolment
- 53
- 54 • Participant post-code (to identify location and social deprivation score)
- 55  
56  
57  
58  
59  
60

1  
2  
3 Full written consent was taken immediately prior to the interview and the participant was reminded  
4 that they were able to stop at any point or withdraw from the study without needing to give a reason.  
5  
6

## 7 8 Data Analysis 9

10 All interviews were digitally recorded and professionally transcribed (intelligent verbatim  
11 transcription). A thematic analysis was used to identify emerging themes and was guided by a general  
12 inductive approach<sup>12,13</sup>. This was used to create the framework applied to subsequent interviews.  
13  
14 Themes were developed using a three-step approach of open coding, axial coding and selective  
15 coding<sup>14</sup> of the transcripts. Given the objective of this study was to identify themes and outcomes not  
16 previously reported in trials, it was important not to base data analysis and outcome identification on  
17 a framework built on previously published literature. BA and RM (a researcher with significant  
18 experience in qualitative research methods) independently analysed the first two transcripts and  
19 through discussion identified themes and adjustments to the interview schedule. There were no  
20 disagreements about coding, but had there been, these would have been discussed with the study  
21 management team. The final themes were agreed by all authors through discussion. Data analysis was  
22 supported using NVivo 11 ([http://www.qsrinternational.com/products\\_nvivo.aspx](http://www.qsrinternational.com/products_nvivo.aspx), QSR International,  
23 Burlington, MA, USA).  
24  
25  
26  
27  
28  
29  
30  
31  
32  
33  
34  
35  
36  
37  
38  
39

## 40 Approvals and Portfolio Adoption

41 The study was given ethical approval by the National Research Ethics Service North West—Cheshire  
42 (11/NW/0739) and governance approvals by Central Manchester University Hospital NHS  
43 Foundation Trust. The study was adopted by the National Institute for Health Research (NIHR)  
44 Clinical Research Network Portfolio (ID 33312).  
45  
46  
47  
48  
49  
50

## 51 Reporting

52 This paper uses the SRQR checklist to structure the report of the study findings<sup>15</sup>.  
53  
54  
55

## 56 Patient and Public involvement

57 A Study Advisory Group (SAG) forms part of the management structure of the wider GASTROS  
58 study<sup>6</sup>, of which this qualitative study forms part of the first stage. The SAG is made up of key  
59  
60

1  
2  
3 stakeholder representatives including patients, oncology nurses and surgeons. The group provides  
4  
5 advice on the methodology of the study, general delivery of the study against its stated objectives and  
6  
7 ensures that the viewpoints of all stakeholder groups are considered. The results of this study were  
8  
9 presented to a SAG meeting; the ensuing discussion influenced the design of the next stage of the  
10  
11 study in preparation for an international Delphi Survey.  
12  
13

14 Best practice guidelines for patient and public engagement were followed as set out by INVOLVE  
15  
16 (part of and funded by the United Kingdom's National Institute for Health Research)<sup>16</sup>.  
17  
18  
19  
20  
21  
22  
23  
24  
25  
26  
27  
28  
29  
30  
31  
32  
33  
34  
35  
36  
37  
38  
39  
40  
41  
42  
43  
44  
45  
46  
47  
48  
49  
50  
51  
52  
53  
54  
55  
56  
57  
58  
59  
60

For peer review only

**Table 1. Interview schedule.**

|    |                                                                                                                                                                                                                                                                                                                                                                                                    |
|----|----------------------------------------------------------------------------------------------------------------------------------------------------------------------------------------------------------------------------------------------------------------------------------------------------------------------------------------------------------------------------------------------------|
| 1. | I understand you have (had) gastric cancer. Can you tell me about that?                                                                                                                                                                                                                                                                                                                            |
| 2. | <p><i>Could you tell me about how you first found out you had gastric cancer?</i></p> <p>Prompts:</p> <ul style="list-style-type: none"> <li>• <i>What questions did you most want to ask, when you were told that you had gastric cancer?</i></li> </ul>                                                                                                                                          |
| 3  | <p>Were there were any areas you wanted more information about but were unable to find?</p> <p>Prompts:</p> <ul style="list-style-type: none"> <li>• <i>Were you given any leaflets at the time of diagnosis? Did you find these useful?</i></li> </ul>                                                                                                                                            |
| 4  | <p>What treatment was offered and how you decide about undergoing treatment.</p> <p>Prompts:</p> <ul style="list-style-type: none"> <li>• <i>What information did you want about the treatment you would be receiving?</i></li> <li>• <i>What factors did you consider when deciding on the treatment?'</i></li> </ul>                                                                             |
| 5  | <p>What effects did the treatment have on you after surgery?</p> <p>Prompts:</p> <ul style="list-style-type: none"> <li>• <i>Did the treatment affect your physical or mental well-being?</i></li> <li>• <i>Did the treatment have an effect on relationships with those around you?</i></li> <li>• <i>Did you have to make any changes to your behaviour as a result of treatment?</i></li> </ul> |
| 6  | <p>What long-term effects did the treatment have on you?</p> <p>Prompts:</p> <ul style="list-style-type: none"> <li>• <i>Did the treatment affect your physical or mental well-being?</i></li> <li>• <i>Did the treatment have an effect on relationships with those around you?</i></li> <li>• <i>Did you have to make any changes to your behaviour as a result of treatment?</i></li> </ul>     |
| 7  | What was the worst side effect of treatment?                                                                                                                                                                                                                                                                                                                                                       |
| 8  | What are your concerns for the future, especially those relating to their diagnosis/history of gastric cancer?                                                                                                                                                                                                                                                                                     |

|    |                                                                                                                                                                                                           |
|----|-----------------------------------------------------------------------------------------------------------------------------------------------------------------------------------------------------------|
| 9  | Did the explanation of what you should expect from surgery match your real experience?                                                                                                                    |
| 10 | In the context of research studies, can you explain what an outcome is in your own words?<br>The interviewer will then provide a definition of the term 'outcome' is in the context of clinical research. |
| 11 | What, in your opinion, is the most important outcome to measure in gastric cancer surgery trials?                                                                                                         |
| 12 | Are there any other outcomes which may be important to measure?                                                                                                                                           |
| 13 | Has your perspective on what is important changed over time?                                                                                                                                              |
| 14 | Is there anything else that you feel is important to talk about that we have not discussed?                                                                                                               |



**Table 2. Eligibility criteria for study participants.**

|              | Potential Participants Approached                                                                                                                                                 | Potential Participants Not Approached                                                                                                                                                                       |
|--------------|-----------------------------------------------------------------------------------------------------------------------------------------------------------------------------------|-------------------------------------------------------------------------------------------------------------------------------------------------------------------------------------------------------------|
| Participant  | <ul style="list-style-type: none"> <li>• Male and females aged 18 years and older.</li> <li>• Individuals able to participate in an interview in the English language.</li> </ul> | <ul style="list-style-type: none"> <li>• Patients unable to give informed consent</li> <li>• Patients too unwell to comfortably participate in an interview lasting approximately 30-60 minutes.</li> </ul> |
| Pathology    | <ul style="list-style-type: none"> <li>• Adenocarcinoma and squamous cell carcinoma of the stomach, (which makes up 95 per cent of all stomach tumours).</li> </ul>               | <ul style="list-style-type: none"> <li>• Gastrointestinal Stromal Tumours</li> <li>• Neuro-endocrine tumours</li> <li>• Lymphoma</li> <li>• Benign disease</li> </ul>                                       |
| Intervention | <ul style="list-style-type: none"> <li>• Total and partial gastrectomy</li> <li>• Open and laparoscopic approaches</li> </ul>                                                     | <ul style="list-style-type: none"> <li>• Surgery with palliative intent</li> <li>• Endoscopic therapies such as EMR (endoscopic mucosal resection) and ESD (endoscopic Submucosal dissection)</li> </ul>    |

## Results

### Overview

In total, 20 patients were interviewed. Table 3 summarises demographic data and treatment-related characteristics of participants. Interviews lasted a median of 50.5 minutes (29-75 minutes). No patients withdrew from the study. Data saturation was deemed to have been reached by 20 interviews; one new outcome was identified in interview number 18 (related to sexual activity), however, no further outcomes were identified from the following two transcripts.

### Outcome Themes

Six broad themes enveloping 38 outcomes were identified;

1. Surviving and controlling cancer,
2. Technical aspects of surgery,
3. Adverse events from surgery,
4. Recovering from surgery,
5. Long-term problems following surgery and
6. Long-term life impact of surgery.

Appendix 1 provides a breakdown of how all themes were developed from outcomes identified during the interviews. Themes were well represented in each interview; each theme was discussed by at least 18 of 20 participants. Appendix 2 demonstrated the outcomes identified during the interviews and how often they were referenced.

#### *Theme 1: Surviving and controlling cancer*

For most, details of their initial consultation were sketchy; participants often described being given lots of information about their diagnosis, much of which was not absorbed. However, patients clearly remember their reaction to being told their cancer diagnosis; for most, the response was the same:

“When you hear the word, cancer, you think that’s it. I’m going to die.” (participant 6)

There was a range of personal experience with cancer within our patient group. Some had direct family members who had undergone chemotherapy and had an intimate knowledge of its effects.

1  
2  
3 “it was my worst nightmare come true because I lost my dad to cancer and I always had it in  
4 the back of my mind, well if one person in the family could get cancer from somewhere then  
5 we could as well.” (participant 19)  
6  
7  
8  
9

10 Some patients had a vague knowledge of friends or work colleagues who had undergone treatments  
11 for cancer and others had no prior experience of cancer at all. Despite these differences, the initial  
12 responses to their diagnosis were similar.  
13  
14  
15

16 All participants in our study had undergone radical surgery with curative intent. At the time of  
17 interview, no participants had confirmed evidence of disease recurrence although one was being  
18 investigated for potential recurrence. Once the discussion with their surgeon moved away from the  
19 diagnosis and onto potentially curative treatments, participants often focused their questions on  
20 ‘survival’:  
21  
22  
23  
24  
25  
26

27  
28 “I wanted to know what the chances were of me having this removed and not, well, basically  
29 not dying from it.” (participant 4)  
30  
31  
32

33 Despite radical surgery (and peri-operative chemotherapy in half of our participants), for many of the  
34 participants the fear of recurrence remained a permanent anxiety. Many participants seemed to  
35 understand that due to the aggressive nature of gastric cancer, recurrence is a possibility for many:  
36  
37  
38  
39

40 “...you’re always worried that it’s going to come back...” (participant 7)  
41  
42

43 The study cohort included participants who had undergone surgery between 5 months and 14 years  
44 prior to the interviews. There did not seem to be a relationship between the length of time out of  
45 surgery and concerns about cancer recurrence.  
46  
47  
48  
49

### 50 *Theme 2: Technical aspects of surgery*

51 Several outcomes related to this theme were discussed by participants. Most importantly, participants  
52 focused on whether the surgical team was able to excise the ‘cancer’ in its entirety. This priority was  
53 often referenced in relation to the ‘success’ of surgery and its contribution to ‘curing’ participants of  
54 cancer:  
55  
56  
57  
58  
59  
60

1  
2  
3           “...thinking to yourself that, you know, everything has been done to the best of the hospital’s  
4           ability, and, you know, they’ve taken absolutely everything out.” (participant 4)  
5  
6

7 Whilst participants mostly referred to the cancer as a single ‘entity’, there were a small number who  
8 demonstrated some knowledge of the importance of different aspects of surgery such as lymph node  
9 excision:  
10  
11

12           “And yeah, I remember the news about the pathology on the bits they’d taken away, and the  
13           lymph node system and what not, came a week or two before I was due to go back on the  
14           chemo.” (participant 20)  
15  
16  
17  
18

19 Six participants underwent a minimally invasive surgery with the remainder undergoing open surgery.  
20 The size of the wounds or type of surgical approach was referred to by only a minority of our  
21 participants. In the main, these were made in passing as little importance was placed on the surgical  
22 approach:  
23  
24  
25  
26  
27

28           Interviewer: “Okay, and what...what did that mean for you to have keyhole surgery?”  
29

30           Respondent: “It didn’t mean anything really, you know, I had...I’d heard about keyhole and  
31           people who’d had it.” (participant 5)  
32  
33  
34  
35  
36

### 37 *Theme 3: Adverse events following surgery*

38

39 Eleven participants suffered a complication following surgery; however, this theme was important to  
40 all interviewees. Peri-operative death was the most frequently discussed surgical complication:  
41  
42

43           “...the fear of dying on the operating table is really real.” (participant 2)  
44  
45  
46

47 During their surgical consultation, participants retained some understanding of the risk of peri-  
48 operative death and many were able to quote figures about how likely this complication was. Other  
49 complications were highlighted when recounting a personal experience. While all complications  
50 occurred in the post-operative period, there were several different causes attributed to these events  
51 (e.g. direct surgical, anaesthesia-related and medication-related). The severity and consequences of  
52 the complications also varied significantly; some were self-limiting and resulted in a minor extension  
53 of the length of hospital stay:  
54  
55  
56  
57  
58  
59  
60

1  
2  
3 “But I was out of it for three days, I was just hallucinating and God knows what, probably  
4 because of the morphine.” (participant 7)  
5  
6  
7

8 And those which were life-threatening and required significant clinical intervention:  
9

10 “It was a twisted bowel. Yeah, I was told it was a twisted bowel. Because I always  
11 remember that when they brought me back from obviously having a look and everything, I  
12 always remember [they] said...we're going to have to take you back to surgery.” (participant  
13 15)  
14  
15  
16  
17  
18  
19

20 The severity of the complications suffered did not seem to shape the key priorities in relation to  
21 participants’ ‘worst side effect’ of surgery or ‘most important outcome’; these almost entirely related  
22 to ‘long-term impacts of surgery’ and ‘cure’ respectively (see below) regardless of how long ago their  
23 operation was and which surgical approach (laparoscopic or open surgery) was employed.  
24  
25  
26  
27  
28

29 Whilst participants recounted that some of the more serious complications (e.g. death, anastomotic  
30 leak and cardio-pulmonary complications) were described by surgeons during the consent process,  
31 some were exposed to other sources of information in the pre-operative stage. Participants were  
32 regularly provided with written information about their cancer and its management, however the  
33 quality and content of this varied depending on the location of their hospital. The response to this  
34 format was varied:  
35  
36  
37  
38  
39  
40  
41

42 “I’m going to be honest with you, I didn’t actually read them... because I didn’t want things  
43 going in my head that I couldn’t take in.” (participant 17)  
44  
45  
46

47 Participants that read the written information often found them difficult to digest for several reasons  
48 including the volume of information and fear of the gravity of the diagnosis or prognosis:  
49

50  
51 “Well some of it were just waste of time, but others, you know, if you’ve got a book about  
52 that thick and you read through it and half of it applies to you, and the others just  
53 sort...doesn’t apply, you know.” (participant 5)  
54  
55  
56  
57  
58  
59  
60

1  
2  
3 “As much as it’s alright handing leaflets out, I can...I am a bit of a reader so I will read stuff,  
4 but when you think you’ve got a death sentence you think, what’s the point in reading that?”  
5  
6 (participant 13)  
7  
8  
9

10  
11 Several hospitals had patient-support groups which provide a ‘buddy’ system for those awaiting  
12 surgery. These support groups became an important part of the recovery process and continue to be  
13 relevant many years after surgery. Patients found these more useful as they had the opportunity to  
14 speak to those with lived experience of the diagnosis and treatment. Whilst this served as an important  
15 source of information to tackle the longer-term impacts of surgery (below), these groups also provided  
16 comfort to patients:  
17  
18  
19  
20  
21  
22  
23

24 “I think the support group and speaking to people that have been through it, because it  
25 can demystify it quite a lot.” (participant 2)  
26  
27  
28

29 Peer support also provided additional sources of information to participants in the pre-operative  
30 period with respect to some of the complications that could arise:  
31  
32

33 “And I know one guy, where the oesophagus junction was, he’d had that leaking, and he  
34 couldn’t eat more than, like, grains of rice and things; so that would be pretty  
35 horrendous.” (participant 4)  
36  
37  
38

39 As a result of verbal and written information from healthcare professionals and additional peer  
40 support, participants were able to describe key adverse without necessarily having experienced them  
41 firsthand.  
42  
43  
44  
45  
46  
47

#### 48 *Theme 4: Recovery from surgery*

49

50 Experiences during the immediate post-operative recovery period were referenced by 18 study  
51 participants. Whilst some participants’ experience of recovery from surgery was directly linked to  
52 complications, there were aspects of recovery such as post-operative pain, mobility and the  
53 recommencement oral intake that were common amongst all those who spoke this theme.  
54  
55  
56  
57  
58  
59  
60

1  
2  
3 Most participants did not mention post-operative pain as an important focus. Those that did, expected  
4 to suffer a degree of pain, however experiences of its severity varied widely. Pain levels amongst  
5 interviewees who had undergone similar operations through laparotomy incisions were not uniform.  
6  
7

8  
9 One participant who had open surgery described:

10  
11 “I do remember waking up and really being in a hell of a lot of pain and being really out  
12 of it.” (participant 6)  
13  
14

15  
16 Whilst another who had undergone their surgery using the same approach recounted:

17  
18 “I didn't really have much pain.” (participant 14)  
19

20 Discussions around post-operative pain were not confined to discomfort from the surgical incisions,  
21 but also related to post-operative complications:  
22

23  
24 “I was back in writhing in agony with a serious infection in the wound.” (participant 9)  
25

26 Participants recounted the limitations in their mobility during the post-operative period. There were  
27 many factors contributing to this, including physical weakness, not receiving appropriate  
28 encouragement to mobilise and being restricted by surgical drains:  
29  
30

31  
32 “...really difficult to be mobile I suppose, and move around, yourself, ‘cause obviously  
33 you’ve got quite a lot of tubes and different things coming out. I felt very, very swollen.”  
34  
35 (participant 6)  
36  
37  
38  
39  
40

#### 41 *Theme 5: Long-term problems following surgery*

42  
43 All participants described significant long-term symptoms related to surgery. For the most, this  
44 represented the ‘worst side effect’ in relation to their treatment and outcomes from this theme were  
45 referenced more than any other theme further emphasising its importance. All participants described  
46 experience with struggling to eat and drink following surgery and the majority (16/20) talked  
47 extensively about the impact of fatigue on their daily lives. Problems with maintaining weight, issues  
48 with ongoing gastro-intestinal symptoms and chronic pain were discussed by most participants.  
49  
50  
51  
52  
53  
54  
55  
56  
57  
58  
59  
60

1  
2  
3 Fatigue was described in many ways; 'exhaustion', 'feeling tired all the time', 'feeling so weak' and  
4 'having no energy'. For the main, fatigue was a symptom which persisted for months after surgery  
5 and could impact on a participant's ability to undertake day-to-day activities or to socialise:  
6  
7

8  
9 "Well, I'm so weak, I used to go out, you know, and do fishing and do things with my lads.  
10  
11 I'm just getting that little bit better now after eight months, but I'm so weak and tired."  
12  
13 (participant 18)  
14  
15  
16  
17

18 Adapting to fatigue was and for many continued to be a difficult challenge, however many  
19 participants understood that this was a recognised and acceptable symptom to them given the  
20 magnitude of the surgery:  
21  
22

23  
24 "I've come out with...more...appreciation for looking after myself and my...And if I'm tired, I  
25  
26 stop." (participant 15)  
27  
28  
29  
30

31 There were several causes for the struggles participants associated with eating and drinking.  
32 Participants often described having to eat and drink smaller volumes more frequently and some were  
33 unable to tolerate certain food types or consistencies. This had a direct effect on the pleasure  
34 associated with eating and an impact on where participants could eat:  
35  
36  
37

38  
39 "Well I don't eat what I would like to...But I know that for the rest of my life, I won't be able  
40  
41 to go out for big meals, to big venues and eat like I used to eat before, you know." (participant  
42  
43 5)  
44  
45

46 Most participants recounted being told prior to their surgery that their diet would be different and that  
47 they would have to 'learn how to eat again'. Despite this, some participants felt that not enough  
48 information was given to highlight the true impact of this long-term issue and methods to address it:  
49  
50

51  
52  
53 "I think it's a lot worse than what they tell you. Because like some days, I'll eat a certain thing  
54  
55 which I've ate before, and you just can't breathe properly, it's choking you." (participant 18)  
56  
57  
58  
59  
60



1  
2  
3 A broad range of gastro-intestinal symptoms were reported by participants. The time frame relating to  
4 how long these persisted was similarly broad (sometimes months and years) and did not seem to  
5 follow a pattern. Nausea, vomiting, diarrhoea, reflux and belching were the commonest problems  
6 described. Many of these symptoms resulted in significant impacts on quality of life (see theme 6  
7 below):  
8  
9  
10  
11  
12

13 “...I still get the bile reflux and I get this constant pain in the oesophagus which affects my  
14 sleeping as well.” (participant 7)  
15  
16

17  
18  
19 “The dumping syndrome was mentioned. Never understood it until it happened. You know,  
20 how my body reacted to certain foods that I'd normally eat that it doesn't like anymore.”  
21  
22  
23  
24 (participant 15)  
25  
26  
27

### 28 *Theme 6: Long-term life impact of surgery*

29  
30 The long-term effects on ‘normality’, quality of life, and psychological impact of surgery were  
31 discussed extensively by all patients. A strong desire to return to a form of ‘normality’ was regularly  
32 expressed. Whilst the reference point for ‘normality’ differed amongst patients, common  
33 characteristics existed; namely a desire to do what they used to do such as working, exercising,  
34 socialising with friends and family and being able to travel:  
35  
36  
37  
38  
39

40  
41 “it’s about living as I did before, and forgetting what had happened, and I do that quite often.”  
42  
43 (participant 6)  
44  
45  
46  
47

48 The experience of returning to normality varied amongst those interviewed. Many participants were  
49 largely able to return to their ‘normal’ activities albeit with some modifications:  
50

51 “Yes. I want to go on holidays again. I love cruises and I want...but until my eating’s  
52 improved, I wouldn’t do that.” (participant 1)  
53  
54  
55  
56  
57

58 “Now that it’s 18 months on, I am back to having what would be a normal life again, now,  
59 albeit with smaller portions of meals and things” (participant 4)  
60

1  
2  
3  
4  
5 Some participants however have not been able to return to activities that provided them with  
6  
7 significant enjoyment:

8  
9 “I’ve never actually got back to my normal activity. I’ve never played golf since that day and  
10  
11 I used to love golf.” (participant 4)  
12  
13

14  
15  
16 In general, participants understood that life after gastrectomy would be different:

17  
18 “I’m still alive, and then I need to get back to normal. It takes a while for you to realise your  
19  
20 new normality is not like your old normality.” (participant 2)  
21  
22

23  
24 Whilst much of the discussion relating to ‘normality’ centred around specific tasks which participants  
25  
26 valued or missed, the impact of gastrectomy on a participant’s overall general quality of life was  
27  
28 important to many. Many understood that quality of life needed to be redefined in comparison to life  
29  
30 before surgery, but nonetheless there was a minimum level that would need to be achieved:

31  
32  
33 “if I have some sort of quality of life, where I can get up and wash myself and do, that is  
34  
35 something that I’d live for. But I couldn’t be sat there and nursed 24/7” (participant 17)  
36  
37

38  
39 The psychological burden on participants following gastrectomy is a significant one. Each of the  
40  
41 previously discussed themes could impact on a participant’s mental state and whilst certain phases of  
42  
43 the treatment pathway were time-limited, the psychological effects could persist for much longer;

44  
45  
46 “You don’t just suffer from physical; you suffer from mental. And I think the mental is a lot  
47  
48 more powerful than the physical, because you can shut pain off by taking medication, but it’s  
49  
50 very hard to shut problems off mentally.” (participant 18)  
51

52  
53 “You know, ‘cause psychologically you think you’ve still got this poison in your body, as  
54  
55 much as I’ve got rid of, you know, my monster.” (participant 13)  
56  
57  
58  
59  
60

1  
2  
3 Some of the psychological impacts were associated with participants having to adapt to a new  
4 normality in relation to what they were able to do, what they were able to eat, how they looked  
5 physically or how they felt around others:  
6  
7  
8

9 “Well, it was a problem because like I say, I've always been a proud chap and proud of my  
10 body because I kept myself fit and everything. When I looked in the mirror, quite distressing.  
11 That was it, yeah. It makes you feel inferior.” (participant 18)  
12  
13  
14  
15  
16  
17

18 “I feel a freak, I feel when I go into a big room with people that everybody has got a stomach  
19 and I haven't got one, it's not that I want them to know, but I just don't feel the same  
20 anymore...” (participant 8)  
21  
22  
23  
24  
25  
26

#### 27 Definition of ‘outcome’ by patients

28 All participants were asked what their understanding of the term ‘outcome’ was in the context of  
29 clinical research. Two participants were able to provide a broad-ranging definition which  
30 encompassed some of the benefits and adverse effects of treatment:  
31  
32  
33

34 “my perception of what would be meant by that phrase would...at a variety of levels; it could  
35 be does the patient live or die? Does the patient recover to an acceptable state for an extended  
36 period of time, and my understanding of what that might be, would be a, sort of, five year  
37 period...” (participant 20)  
38  
39  
40  
41  
42  
43  
44

45 One person stated that they did not know how to define the term, whilst the remainder defined  
46 ‘outcome’ by recounting a single outcome, which was most important to them:  
47  
48  
49

50 “Okay, my understanding is that at the...the outcome would be that the cancer would be  
51 possibly all gone.” (participant 19)  
52  
53  
54  
55

56 Participants were asked to provide a single outcome that was ‘most important to them’. Fifteen  
57 participants identified that the most important outcome was that they were ‘cured of cancer’ with the  
58 remaining five describing outcomes related to ‘returning to normal’ and being able to enjoy a ‘good  
59  
60

1  
2  
3 quality of life'. These priorities did not alter with respect to how long-ago surgery was performed,  
4  
5 which approach was undertaken or how old the patient was.  
6  
7  
8  
9  
10  
11  
12  
13  
14  
15  
16  
17  
18  
19  
20  
21  
22  
23  
24  
25  
26  
27  
28  
29  
30  
31  
32  
33  
34  
35  
36  
37  
38  
39  
40  
41  
42  
43  
44  
45  
46  
47  
48  
49  
50  
51  
52  
53  
54  
55  
56  
57  
58  
59  
60

For peer review only

**Table 3. Patient characteristics and demographic data.**

| Patient | Sex | Age | Ethnicity<br>* | Social<br>deprivation<br>quintile** | Home<br>circumstances  | Months<br>since<br>surgery | Type of surgery     | Approach to<br>surgery | Post-operative<br>complications | Peri-operative<br>treatment |
|---------|-----|-----|----------------|-------------------------------------|------------------------|----------------------------|---------------------|------------------------|---------------------------------|-----------------------------|
| 1       | F   | 74  | A              | 3rd                                 | Lives alone            | 15                         | Partial Gastrectomy | Laparoscopic           | Yes                             | Nil                         |
| 2       | M   | 59  | B              | 3rd                                 | Lives alone            | 27                         | Total Gastrectomy   | Open surgery           | Yes                             | Chemotherapy                |
| 3       | M   | 71  | A              | 1st                                 | Lives alone            | 16                         | Partial Gastrectomy | Open surgery           | Yes                             | Nil                         |
| 4       | M   | 43  | A              | 2nd                                 | Lives with<br>parents  | 15                         | Total Gastrectomy   | Open surgery           | Yes                             | Chemotherapy                |
| 5       | M   | 80  | A              | 3rd                                 | Lives alone            | 23                         | Partial Gastrectomy | Laparoscopic           | Yes                             | Nil                         |
| 6       | F   | 52  | A              | 2nd                                 | Lives with<br>children | 32                         | Total Gastrectomy   | Open surgery           | No                              | Chemotherapy                |
| 7       | M   | 79  | A              | 1st                                 | Lives with<br>spouse   | 58                         | Total Gastrectomy   | Laparoscopic           | Yes                             | Chemotherapy                |
| 8       | F   | 63  | A              | 1st                                 | Lives alone            | 5                          | Total Gastrectomy   | Open surgery           | No                              | Nil                         |
| 9       | M   | 61  | A              | 3rd                                 | Lives with<br>spouse   | 170                        | Total Gastrectomy   | Open surgery           | No                              | Nil                         |

|    |    |    |    |   |     |             |     |                     |              |     |              |
|----|----|----|----|---|-----|-------------|-----|---------------------|--------------|-----|--------------|
| 1  |    |    |    |   |     |             |     |                     |              |     |              |
| 2  |    |    |    |   |     |             |     |                     |              |     |              |
| 3  | 10 | M  | 61 | C | 1st | Lives alone | 79  | Total Gastrectomy   | Open surgery | No  | Chemotherapy |
| 4  |    |    |    |   |     |             |     |                     |              |     |              |
| 5  |    |    |    |   |     | Lives with  |     |                     |              |     |              |
| 6  | 11 | M  | 76 | A | 4th | spouse      | 110 | Total Gastrectomy   | Laparoscopic | Yes | Chemotherapy |
| 7  |    |    |    |   |     |             |     |                     |              |     |              |
| 8  |    |    |    |   |     |             |     |                     |              |     |              |
| 9  | 12 | F  | 82 | A | 4th | Lives alone | 62  | Partial Gastrectomy | Open surgery | No  | Nil          |
| 10 |    |    |    |   |     |             |     |                     |              |     |              |
| 11 |    |    |    |   |     | Lives with  |     |                     |              |     |              |
| 12 | 13 | F  | 59 | A | 2nd | spouse      | 19  | Partial Gastrectomy | Open surgery | No  | Chemotherapy |
| 13 |    |    |    |   |     |             |     |                     |              |     |              |
| 14 |    |    |    |   |     |             |     |                     |              |     |              |
| 15 | 14 | M  | 70 | B | 1st | Lives alone | 11  | Partial Gastrectomy | Open surgery | No  | Nil          |
| 16 |    |    |    |   |     |             |     |                     |              |     |              |
| 17 |    |    |    |   |     | Lives with  |     |                     |              |     |              |
| 18 | 15 | F  | 56 | M | 5th | parent      | 33  | Total Gastrectomy   | Open surgery | Yes | Chemotherapy |
| 19 |    |    |    |   |     |             |     |                     |              |     |              |
| 20 | 16 | F  | 84 | A | 1st | Lives alone | 17  | Partial Gastrectomy | Laparoscopic | Yes | Nil          |
| 21 |    |    |    |   |     |             |     |                     |              |     |              |
| 22 |    |    |    |   |     | Lives with  |     |                     |              |     |              |
| 23 | 17 | M  | 48 | A | 4th | parent      | 9   | Total Gastrectomy   | Laparoscopic | Yes | Chemotherapy |
| 24 |    |    |    |   |     |             |     |                     |              |     |              |
| 25 |    |    |    |   |     | Lives with  |     |                     |              |     |              |
| 26 | 18 | M  | 77 | A | 4th | spouse      | 78  | Total Gastrectomy   | Open surgery | Yes | Nil          |
| 27 |    |    |    |   |     |             |     |                     |              |     |              |
| 28 |    |    |    |   |     | Lives with  |     |                     |              |     |              |
| 29 | 19 | Fe | 58 | A | 3rd | spouse      | 11  | Partial Gastrectomy | Laparoscopic | No  | Nil          |
| 30 |    |    |    |   |     |             |     |                     |              |     |              |
| 31 |    |    |    |   |     |             |     |                     |              |     |              |
| 32 |    |    |    |   |     | Lives with  |     |                     |              |     |              |
| 33 | 20 | M  | 54 | A | 1st | Lives with  | 48  | Partial Gastrectomy | Open surgery | No  | Chemotherapy |
| 34 |    |    |    |   |     |             |     |                     |              |     |              |
| 35 |    |    |    |   |     |             |     |                     |              |     |              |
| 36 |    |    |    |   |     |             |     |                     |              |     |              |
| 37 |    |    |    |   |     |             |     |                     |              |     |              |
| 38 |    |    |    |   |     |             |     |                     |              |     |              |
| 39 |    |    |    |   |     |             |     |                     |              |     |              |
| 40 |    |    |    |   |     |             |     |                     |              |     |              |
| 41 |    |    |    |   |     |             |     |                     |              |     |              |
| 42 |    |    |    |   |     |             |     |                     |              |     |              |
| 43 |    |    |    |   |     |             |     |                     |              |     |              |
| 44 |    |    |    |   |     |             |     |                     |              |     |              |
| 45 |    |    |    |   |     |             |     |                     |              |     |              |
| 46 |    |    |    |   |     |             |     |                     |              |     |              |

1  
2  
3 spouse  
4  
5  
6  
7

8 \*A=, B= , C= , M= . \*\*Social deprivation quintile: 1<sup>st</sup> quintile being the least deprived, 5<sup>th</sup> quintile being the most deprived.  
9  
10  
11  
12  
13  
14  
15  
16  
17  
18  
19  
20  
21  
22  
23  
24  
25  
26  
27  
28  
29  
30  
31  
32  
33  
34  
35  
36  
37  
38  
39  
40  
41  
42  
43  
44  
45  
46

For peer review only

## Discussion

To our knowledge, this is the first in-depth qualitative study exploring the priorities of patients following potentially curative surgery for gastric cancer. The study focussed on this cohort as one of the main aims was to identify outcomes which would be considered for inclusion in a COS for potentially curative surgical trials in gastric cancer. This present study will be used to help generate a list of outcomes that will be presented for prioritisation to healthcare professionals and patients in an international, multi-language online Delphi survey. The results of the Delphi survey will inform a consensus meeting to finalise the COS. Whilst other COS studies in the field of cancer<sup>17-19</sup> may have identified similar important outcomes such as survival, it was important to consider our participants separately given the unique problems which arise with gastrectomy. These include distinctive short and long-term problems related to surgery such as anastomotic leak and reactive hypoglycaemia (Dumping syndrome) which would not be relevant in other COS.

The themes identified highlight the profound and wide-ranging physical, social and psychological impacts that gastrectomy has on patients which can persist for months and years. We have previously described the reporting of outcomes in surgical trials for gastric cancer over a twenty-year period<sup>5</sup>. Most surgical trials in this field have focused on reporting short-term post-operative outcomes. Whilst these are important to patients, they are not representative of the whole picture. This work highlights how patient priorities for outcomes may differ from the traditional surgical focus. More work is now needed to develop the COS which incorporates views of all key stakeholders including patients.

More than half of the 'top-ten' most frequently discussed outcomes in our study related to longer-term issues such as problems with eating, returning to 'normality', fatigue, weight loss, gastro-intestinal symptoms and psychological impacts. These types of outcomes are infrequently reported in surgical trials and demonstrate that researchers within this field have not reflected the priorities of patients.

This challenge needs to be addressed using an approach which is inclusive of patients and their views.

The GASTROS study aims to develop a COS; critically important outcomes which should be reported - as a minimum - by future surgical trials for gastric cancer<sup>6</sup>. By standardising the reporting of such outcomes, it aims to improve the ability to synthesise evidence, reduce research waste and ultimately



1  
2  
3 aid researchers in answering important questions related to gastrectomy. The first stage in developing  
4 the COS consists of identifying a ‘long-list’ of outcomes which will then be prioritised by key  
5 stakeholders during an international online Delphi survey. The process of developing the long-list  
6 should be comprehensive and involve both healthcare professionals and patients in order to minimise  
7 the risk of omitting potentially important outcomes. Our study reaffirms the importance of a mixed-  
8 methods approach to identifying potentially important outcomes. As others COS developers have  
9 found, building a long-list based solely on outcomes reported in previous trials or as developed by  
10 clinicians often neglects the views of key stakeholders<sup>8-10</sup>. This ultimately runs the risk of producing a  
11 COS which does not reflect the priorities of patients which does little to address the current challenges  
12 with outcome reporting.  
13  
14

15  
16 Understanding patient priorities following gastrectomy is invaluable for other reasons. Patients with  
17 gastric cancer want detailed information about their condition and treatment<sup>20</sup>. With the knowledge  
18 that long-term impacts of surgery are important, healthcare professionals can tailor the consent  
19 process prior to surgery to ensure that the patient has a better understanding of these and is making an  
20 informed decision. Considering patient priorities may also have implications for the future  
21 development of national and international audits<sup>3,4</sup>. For several pragmatic reasons, most  
22 comprehensive gastric cancer surgery audits focus on short-term outcomes. Identifying methods to  
23 report longer-term quality outcome measures may make such audits more relevant to patients. Studies  
24 assessing patients’ views in similar disease areas found similar things, that long term outcomes  
25 (survival and long term quality of life) were important<sup>21</sup>.  
26  
27  
28  
29  
30  
31  
32  
33  
34  
35  
36  
37  
38  
39  
40  
41  
42  
43  
44  
45

#### 46 Strengths and weaknesses

47  
48 The study was able to gain an in-depth understanding of patient priorities based on the experience of  
49 participants with a broad range of characteristics representative of those undergoing surgery for  
50 gastric cancer in the UK<sup>4</sup>. Furthermore, our purposive sampling approach was established *a priori* in a  
51 study protocol which had undergone a robust peer-review process.  
52  
53  
54  
55  
56  
57  
58  
59  
60

1  
2  
3 This study was also able to highlight and address significant challenges associated with the  
4 comprehension of medical language by patients; particularly terms central to the development of a  
5 COS. Patients largely did not understand the use of the term ‘outcome’ within the context of medical  
6 research. Once it was defined as an ‘impact or effect of a treatment which may be beneficial or  
7 harmful’, participants were more easily able to describe their key priorities in outcome reporting for  
8 future trials. This has several implications for the GASTROS study as well as other COS projects  
9 moving forward. It highlights the importance of ensuring that the premise of the study is clear and  
10 understood by all participants, especially patients; outcomes included in the Delphi survey must be  
11 presented and explained in a manner which is accessible to all; ‘outcome’ must be clear when  
12 adapting it to other regions where there may be no direct translation for the term.  
13  
14  
15  
16  
17  
18  
19  
20  
21  
22  
23  
24

25 The interviews were conducted by an expert in the field of gastric cancer surgery which may have  
26 resulted in a degree of observer bias. To mitigate this potential limitation, the study management team  
27 (which was made up primarily of members unfamiliar with gastric cancer surgery) was involved in  
28 ongoing discussions during data collection and analysis. It is also possible that patients modified their  
29 responses because of awareness of the background of the interviewer. Every effort was made to  
30 follow the semi-structured interview schedule, to put the patients at ease and take time to let them  
31 talk. The average length of the interviews (greater than 45 mins) reflects the time patients were given  
32 to express their views.  
33  
34  
35  
36  
37  
38  
39  
40  
41

42 A further potential limitation of this present interview study is a lack of international patient  
43 participation. Consequently, there may be outcomes which are relevant to non-UK patients that have  
44 not been identified. Gastric cancer is an international disease and cultural and regional influences  
45 may alter expectations and priorities of patients. Whilst we have not identified evidence from COS  
46 developers in other fields that confirms these variations, it remains a possibility. Our reasons for  
47 limiting the interviews to UK-only patients were primarily down to pragmatism and finite resources.  
48 To mitigate this, the Delphi survey will be available in several languages and during the first round,  
49 all participants will be able to submit additional outcomes that they believe were omitted. These will  
50 be considered by the study team and presented for prioritisation by participants in round two of the  
51  
52  
53  
54  
55  
56  
57  
58  
59  
60

1  
2  
3 Delphi survey, if appropriate. Adopting this approach also enables the exploration of regional  
4 variations in outcome priorities which may form the basis of a future international qualitative study.  
5  
6

7  
8 Recruitment to the study stopped when no new data with interpretative value was identified<sup>22</sup>.  
9

10 However, 'data saturation' is a topic which deserves further discussion as there is no way of knowing  
11 for certain that no new outcomes would have been identified had further interviews been undertaken.  
12

13 Some argue that the term 'data saturation' is often mis-used and misunderstood and should be  
14 operationalised in a way consistent with the scope of the study being undertaken<sup>23</sup>. As described  
15 above, the ability of patients and healthcare participants to suggest further outcomes in round one of  
16 the Delphi survey aims to mitigate against this potential limitation.  
17  
18  
19  
20  
21

22  
23 Most participants had undergone their surgery at least 12 months prior to this study. As such, it should  
24 be acknowledged that there may have been a greater exploration of and emphasis on shorter-term  
25 outcomes had we recruited more participants from a shorter post-operative time-period. Again, to  
26 address this potential limitation, we plan to recruit participants for the Delphi survey from all post-  
27 operative periods and will have the opportunity to examine whether 'time from surgery' affects  
28 patient priorities.  
29  
30  
31  
32  
33  
34  
35

36  
37 In summary, this study identified 38 unique outcomes which are important to patients following  
38 surgery for gastric cancer. Many of these outcomes are poorly represented by trials within this  
39 research field. These outcomes will be added to other potentially important outcomes to be considered  
40 for prioritisation by key stakeholders to develop a COS for surgical trials in gastric cancer.  
41  
42  
43  
44  
45  
46  
47  
48  
49  
50  
51  
52  
53  
54  
55  
56  
57  
58  
59  
60

## References

1. Fact Sheets by Cancer. [http://globocan.iarc.fr/Pages/fact\\_sheets\\_cancer.aspx](http://globocan.iarc.fr/Pages/fact_sheets_cancer.aspx). Accessed July 24, 2017.
2. Colquhoun A, Arnold M, Ferlay J, Goodman KJ, Forman D, Soerjomataram I. Global patterns of cardia and non-cardia gastric cancer incidence in 2012. *Gut*. 2015;64(12):1881-1888. doi:10.1136/gutjnl-2014-308915
3. Messenger M, de Steur WO, van Sandick JW, et al. Variations among 5 European countries for curative treatment of resectable oesophageal and gastric cancer: A survey from the EURECCA Upper GI Group (EUropean REgistration of Cancer CAre). *Eur J Surg Oncol*. 2016;42(1):116-122. doi:10.1016/j.ejso.2015.09.017
4. Michalowski J, Salvador A, Napper R. *Commissioned by Healthcare Quality Improvement Partnership National Oesophago-Gastric Cancer Audit 2018 An Audit of the Care Received by People with Oesophago-Gastric Cancer in England and Wales 2018 Annual Report.*; 2018. <https://www.nogca.org.uk/content/uploads/2018/09/NOGCA-2018-Annual-Report-1.pdf>. Accessed January 2, 2019.
5. Alkhaffaf B, Blazeby JM, Williamson PR, Bruce IA, Glenny A-M. Reporting of outcomes in gastric cancer surgery trials: a systematic review. *BMJ Open*. 2018;8(10):e021796. doi:10.1136/BMJOPEN-2018-021796
6. Alkhaffaf B, Glenny A-M, Blazeby JM, Williamson P, Bruce IA. Standardising the Reporting of Outcomes in Gastric Cancer Surgery Trials: Protocol for the Development of a Core Outcome Set and Accompanying Outcome Measurement Instrument Set (The GASTROS Study). *Trials*. 2017;18(1):370. doi:10.1186/s13063-017-2100-7
7. Williamson PR, Altman DG, Bagley H, et al. The COMET Handbook: version 1.0. *Trials*. 2017;18(S3):280. doi:10.1186/s13063-017-1978-4
8. Sanderson T, Morris M, Calnan M, Richards P, Hewlett S. What outcomes from

- 1  
2  
3 pharmacologic treatments are important to people with rheumatoid arthritis? Creating the basis  
4 of a patient core set. *Arthritis Care Res (Hoboken)*. 2010;62(5):640-646.  
5  
6 doi:10.1002/acr.20034  
7  
8  
9
- 10 9. Allard A, Fellowes A, Shilling V, Janssens A, Beresford B, Morris C. Key health outcomes for  
11 children and young people with neurodisability: qualitative research with young people and  
12 parents. *BMJ Open*. 2014;4(4):e004611. doi:10.1136/bmjopen-2013-004611  
13  
14  
15  
16
- 17 10. Arnold LM, Crofford LJ, Mease PJ, et al. Patient perspectives on the impact of fibromyalgia.  
18 *Patient Educ Couns*. 2008;73(1):114-120. doi:10.1016/j.pec.2008.06.005  
19  
20  
21
- 22 11. Keeley T, Williamson P, Callery P, et al. The use of qualitative methods to inform Delphi  
23 surveys in core outcome set development. *Trials*. 2016;17(1):230. doi:10.1186/s13063-016-  
24 1356-7  
25  
26  
27  
28
- 29 12. Thomas DR. A General Inductive Approach for Analyzing Qualitative Evaluation Data. *Am J*  
30 *Eval*. 2006;27(2):237-246. doi:10.1177/1098214005283748  
31  
32  
33
- 34 13. Braun V, Clarke V. Using thematic analysis in psychology. *Qual Res Psychol*. 2006;3(2):77-  
35 101. doi:10.1191/1478088706qp063oa  
36  
37  
38
- 39 14. Corbin J, Strauss A. *Grounded Theory Research: Procedures, Canons, and Evaluative*  
40 *Criteria*. Vol 13.; 1990. [https://med-fom-familymed-](https://med-fom-familymed-research.sites.olt.ubc.ca/files/2012/03/W10-Corbin-and-Strauss-grounded-theory.pdf)  
41 [research.sites.olt.ubc.ca/files/2012/03/W10-Corbin-and-Strauss-grounded-theory.pdf](https://med-fom-familymed-research.sites.olt.ubc.ca/files/2012/03/W10-Corbin-and-Strauss-grounded-theory.pdf).  
42  
43  
44  
45 Accessed August 10, 2019.  
46  
47
- 48 15. O'Brien BC, Harris IB, Beckman TJ, Reed DA, Cook DA. Standards for Reporting Qualitative  
49 Research. *Acad Med*. 2014;89(9):1245-1251. doi:10.1097/ACM.0000000000000388  
50  
51  
52
- 53 16. Standards | INVOLVE. <https://www.invo.org.uk/current-work/standards/>. Accessed December  
54 7, 2019.  
55  
56
- 57 17. McNair AGK, Whistance RN, Forsythe RO, et al. Core Outcomes for Colorectal Cancer  
58 Surgery: A Consensus Study. *PLOS Med*. 2016;13(8):e1002071.  
59  
60

- 1  
2  
3 doi:10.1371/journal.pmed.1002071  
4  
5  
6 18. Fish R, Sanders C, Adams R, et al. A core outcome set for clinical trials of chemoradiotherapy  
7 interventions for anal cancer (CORMAC): a patient and health-care professional consensus.  
8 *lancet Gastroenterol Hepatol.* 2018;3(12):865-873. doi:10.1016/S2468-1253(18)30264-4  
9  
10  
11  
12  
13 19. MacLennan S, Bekema HJ, Williamson PR, et al. A core outcome set for localised prostate  
14 cancer effectiveness trials: protocol for a systematic review of the literature and stakeholder  
15 involvement through interviews and a Delphi survey. *Trials.* 2015;16:76. doi:10.1186/s13063-  
16 015-0598-0  
17  
18  
19  
20  
21  
22 20. McNair AGK, Brookes ST, Kinnersley P, Blazeby JM. What surgeons should tell patients with  
23 oesophago-gastric cancer: A cross sectional study of information needs. *Eur J Surg Oncol.*  
24 2013;39(11):1278-1286. doi:10.1016/J.EJSO.2013.08.005  
25  
26  
27  
28  
29 21. Avery KNL, Chalmers KA, Brookes ST, et al. Development of a Core Outcome Set for  
30 Clinical Effectiveness Trials in Esophageal Cancer Resection Surgery. *Ann Surg.* March  
31 2017;1. doi:10.1097/SLA.0000000000002204  
32  
33  
34  
35  
36 22. Onwuegbuzie AJ, Dickinson WB, Leech NL, Zoran AG. *A Qualitative Framework for*  
37 *Collecting and Analyzing Data in Focus Group Research.*; 2009.  
38  
39  
40  
41 23. Saunders B, Sim J, Kingstone T, et al. Saturation in qualitative research: exploring its  
42 conceptualization and operationalization. *Qual Quant.* 2018;52(4):1893-1907.  
43  
44  
45 doi:10.1007/s11135-017-0574-8  
46  
47  
48  
49  
50  
51  
52  
53  
54  
55  
56  
57  
58  
59  
60

1  
2  
3  
4  
5  
6  
7  
8  
9  
10  
11  
12  
13  
14  
15  
16  
17  
18  
19  
20  
21  
22  
23  
24  
25  
26  
27  
28  
29  
30  
31  
32  
33  
34  
35  
36  
37  
38  
39  
40  
41  
42  
43  
44  
45  
46

For peer review only

## Appendix 1. Development of themes

Theme: Surviving and Controlling Cancer

| Issues identified on initial coding         | Outcome              | Outcome theme                    |
|---------------------------------------------|----------------------|----------------------------------|
| Being cured of cancer                       | Recurrence of Cancer | Surviving and Controlling Cancer |
| Cancer returning to other parts of the body |                      |                                  |
| Cancer returning in the abdomen             |                      |                                  |
| Possibility of cancer returning             |                      |                                  |
| Being able to live (a little/a lot) longer  | Survival             |                                  |
| Being alive/surviving for a 'long time'     |                      |                                  |
| Chances of (not) dying from cancer          |                      |                                  |
| Chances of survival                         |                      |                                  |

Theme: Adverse events following surgery

| Issues identified on initial coding                                              | Outcome                          | Outcome theme                       |
|----------------------------------------------------------------------------------|----------------------------------|-------------------------------------|
| Complications related to anaesthesia                                             | Anaesthetic complications        | Adverse events following of Surgery |
| Anastomotic leak                                                                 | Anastomotic complications        |                                     |
| Anastomotic stricture                                                            |                                  |                                     |
| Internal bleeding requiring further intervention                                 | Bleeding                         |                                     |
| Concern about cardiac complications in context of previous myocardial infarction | Cardiac complications            |                                     |
| Racing heart beat                                                                |                                  |                                     |
| Stroke following surgery                                                         | Cerebro-vascular complications   |                                     |
| Bowel perforation                                                                | Intestinal complications         |                                     |
| Gastro-intestinal symptoms e.g. constipation                                     |                                  |                                     |
| Obstruction of bowel                                                             |                                  |                                     |
| Epidural related complications                                                   | Medication related complications |                                     |
| Hallucinations                                                                   |                                  |                                     |
| Overdose of medications such as morphine                                         |                                  |                                     |
| Side effects of sedatives                                                        |                                  |                                     |
| Drains and tubes to manage complications                                         | Need for re-intervention         |                                     |
| Endoscopic treatment of anastomotic stricture                                    |                                  |                                     |
| Requiring further surgery to manage complications                                |                                  |                                     |
|                                                                                  |                                  |                                     |



|                                                      |                           |  |
|------------------------------------------------------|---------------------------|--|
| Surgery for incisional hernia                        |                           |  |
| ‘Surviving’ surgery                                  |                           |  |
| Dying from a complication of surgery                 | Peri-operative death      |  |
| Dying on the operating table                         |                           |  |
| Hospital acquired pneumonia                          |                           |  |
| Pleural effusion                                     | Respiratory complications |  |
| Pneumothorax                                         |                           |  |
| Re-admission due to complications such as infections | Re-admission to hospital  |  |
| Re-admission due to pain                             |                           |  |
| Wound dehiscence                                     |                           |  |
| Wound infection                                      | Wound complications       |  |
| Wound leak                                           |                           |  |
| Wound numbness                                       |                           |  |
| Catheter-related problems                            | Urinary complications     |  |

Theme: Long-term impact of surgery

| Issues identified on initial coding                        | Outcome                   | Outcome theme               |
|------------------------------------------------------------|---------------------------|-----------------------------|
| Being able to enjoy a good quality of life                 |                           |                             |
| Uncertainty as to what life will be like following surgery | Overall ‘quality of life’ |                             |
| Changes in mood                                            |                           |                             |
| Clinical depression                                        |                           |                             |
| Feeling ‘abnormal’ and ‘different’ to others               | Psychological impact      |                             |
| Feelings of insecurity                                     |                           |                             |
| Feelings of isolation                                      |                           |                             |
| Issues related to body image                               |                           | Long-term impact of surgery |
| Low mood                                                   |                           |                             |
| Being able to enjoy eating again                           |                           |                             |
| Being able to exercise again                               |                           |                             |
| Being able to interact and socialise with others           | Returning to ‘normality’  |                             |
| Being able to live ‘as they did before’                    |                           |                             |
| Being able to rely on oneself to undertake tasks           |                           |                             |
| Being able to undertake household activities               |                           |                             |

|                                |  |  |
|--------------------------------|--|--|
| such as shopping and gardening |  |  |
| Returning to employment        |  |  |

Theme: Technical aspects of surgery

| Issues identified on initial coding               | Outcome                      | Outcome theme                |
|---------------------------------------------------|------------------------------|------------------------------|
| 'Cutting' the cancer out                          | Complete resection of cancer | Technical aspects of surgery |
| Ensuring no cancer is left behind                 |                              |                              |
| Getting 'rid' of the cancer                       |                              |                              |
| Inability to resect cancer at surgery             |                              |                              |
| Removing all lymph nodes                          |                              |                              |
| Removing spleen if necessary                      | Size of incisions            |                              |
| Ability to perform laparoscopic 'keyhole' surgery |                              |                              |
| Large scars                                       |                              |                              |
| Duration of surgery                               | Duration of surgery          |                              |

Theme: Long-term problems following surgery

| Issues identified on initial coding                  | Outcome                    | Outcome theme                        |                                      |
|------------------------------------------------------|----------------------------|--------------------------------------|--------------------------------------|
| Amounts able to eat and drink                        | Eating and Drinking        | Long-term problems following surgery |                                      |
| Being able to eat 'properly'                         |                            |                                      |                                      |
| Being able to eat at home                            |                            |                                      |                                      |
| Change in diet and types of food patient can consume |                            |                                      |                                      |
| Difficulties swallowing                              |                            |                                      |                                      |
| Requirement for ongoing nutritional support          | Nutritional problems       | Long-term problems following surgery |                                      |
| Vitamin B12 deficiency                               |                            |                                      |                                      |
| Feeling persistently tired                           | Fatigue                    |                                      | Long-term problems following surgery |
| Feeling extremely weak/lethargic/tired               |                            |                                      |                                      |
| Having no energy or stamina                          |                            |                                      |                                      |
| Loss of energy following simple tasks                |                            |                                      |                                      |
| Abdominal bloating                                   | Gastro-intestinal symptoms | Long-term problems following surgery |                                      |
| Belching                                             |                            |                                      |                                      |
| Diarrhoea                                            |                            |                                      |                                      |
| Dumping syndrome                                     |                            |                                      |                                      |
| Excessive flatus                                     |                            |                                      |                                      |
| Nausea                                               |                            |                                      |                                      |

|                                             |                 |  |
|---------------------------------------------|-----------------|--|
| Reflux symptoms (acid or bile)              |                 |  |
| Vomiting                                    |                 |  |
| Abdominal pain or cramps                    | Chronic Pain    |  |
| Headaches and migraines                     |                 |  |
| Long-term wound related pain                |                 |  |
| Muscle cramps                               |                 |  |
| Pain on swallowing                          |                 |  |
| Painful abdominal distension or bloating    |                 |  |
| Inability to regain weight to desired level | Weight problems |  |
| Readjusting to new weight                   |                 |  |
| Speed of weight loss                        |                 |  |
| Weight loss in general                      |                 |  |

Theme: Recovery Following surgery

| Issues identified on initial coding                                        | Outcome                             | Outcome theme              |
|----------------------------------------------------------------------------|-------------------------------------|----------------------------|
| Post-operative plan for physiotherapy                                      | Ambulation                          | Recovery following surgery |
| Restricted mobility due to drains and tubes attached                       |                                     |                            |
| Time to be able to undertake tasks such as standing up, walking or bathing |                                     |                            |
| Time before being allowed to eat and drink                                 | Return of gastrointestinal function |                            |
| Time before bowel function returned                                        |                                     |                            |
| Concern about being too unwell for further chemotherapy                    | Ability to have more chemotherapy   |                            |
| Length of time in hospital                                                 | Duration of hospital stay           |                            |
| Length of time in intensive care                                           |                                     |                            |
| Length of time in pain                                                     | Post-operative pain                 |                            |
| Patterns of pain                                                           |                                     |                            |
| Requirement for analgesia                                                  |                                     |                            |
| Severity of pain                                                           |                                     |                            |

## Appendix 2. Summary of outcomes and outcome themes identified from interviews.

| Outcome Theme                                                                                                                                                             | Outcome                               | How many interviews outcome was referenced in | Total number of references in all interviews |
|---------------------------------------------------------------------------------------------------------------------------------------------------------------------------|---------------------------------------|-----------------------------------------------|----------------------------------------------|
| <b>Surviving and controlling cancer</b> <ul style="list-style-type: none"> <li>• Referenced in 20 interviews</li> <li>• Referenced 90 times in all interviews.</li> </ul> | Curing Cancer                         | 4                                             | 6                                            |
|                                                                                                                                                                           | Recurrence of Cancer                  | 18                                            | 28                                           |
|                                                                                                                                                                           | Survival                              | 20                                            | 56                                           |
| <b>Technical aspects of surgery</b> <ul style="list-style-type: none"> <li>• Referenced in 18 interviews</li> <li>• Referenced 52 times in all interviews.</li> </ul>     | Complete Excision of Cancer           | 18                                            | 52                                           |
|                                                                                                                                                                           | Excision of Lymph Nodes               | 5                                             | 5                                            |
|                                                                                                                                                                           | Need for splenectomy                  | 1                                             | 1                                            |
|                                                                                                                                                                           | Operative time                        | 1                                             | 2                                            |
|                                                                                                                                                                           | Wound Size                            | 7                                             | 11                                           |
| <b>Adverse events</b> <ul style="list-style-type: none"> <li>• Referenced in 20 interviews</li> <li>• Referenced 97 times in all interviews.</li> </ul>                   | Ability to have adjuvant chemotherapy | 1                                             | 1                                            |
|                                                                                                                                                                           | Anaesthetic Complications             | 1                                             | 1                                            |
|                                                                                                                                                                           | Anastomotic Leak                      | 6                                             | 9                                            |
|                                                                                                                                                                           | Anastomotic Stricture                 | 1                                             | 1                                            |
|                                                                                                                                                                           | B12 Deficiency                        | 5                                             | 5                                            |
|                                                                                                                                                                           | Bleeding                              | 1                                             | 2                                            |
|                                                                                                                                                                           | Cardiac Complications                 | 2                                             | 2                                            |
|                                                                                                                                                                           | Catheter related complications        | 1                                             | 1                                            |
|                                                                                                                                                                           | Cerebro-vascular complications        | 1                                             | 1                                            |
|                                                                                                                                                                           | Gastrointestinal problems             | 1                                             | 1                                            |
|                                                                                                                                                                           | Hernia                                | 1                                             | 1                                            |
|                                                                                                                                                                           | Intestinal complications              | 4                                             | 10                                           |
|                                                                                                                                                                           | Medication-related complications      | 10                                            | 12                                           |
| Need for reintervention                                                                                                                                                   | 8                                     | 13                                            |                                              |

|                                                                                                                                    |                                  |    |    |
|------------------------------------------------------------------------------------------------------------------------------------|----------------------------------|----|----|
|                                                                                                                                    | Peri-operative death             | 12 | 20 |
|                                                                                                                                    | Re-Admission to Hospital         | 3  | 4  |
|                                                                                                                                    | Respiratory complications        | 3  | 3  |
|                                                                                                                                    | Wound Complications              | 8  | 10 |
| <b>Recovery from surgery</b>                                                                                                       | In Hospital Recovery             | 11 | 23 |
|                                                                                                                                    | Length of Stay Following Surgery | 11 | 18 |
| <ul style="list-style-type: none"> <li>• Referenced in 18 interviews</li> <li>• Referenced 57 times in all interviews.</li> </ul>  | Peripheral Oedema                | 1  | 1  |
| <b>Long-terms problems following surgery</b>                                                                                       | Eating & Drinking                | 20 | 75 |
|                                                                                                                                    | Fatigue                          | 16 | 38 |
|                                                                                                                                    | Gastrointestinal symptoms        | 11 | 27 |
| <ul style="list-style-type: none"> <li>• Referenced in 20 interviews</li> <li>• Referenced 175 times in all interviews.</li> </ul> | Pain                             | 10 | 14 |
|                                                                                                                                    | Weight Loss                      | 12 | 21 |
| <b>Long-term impacts of surgery</b>                                                                                                | Necessity of long-term feeding   | 1  | 1  |
|                                                                                                                                    | Overall QoL                      | 8  | 10 |
| <ul style="list-style-type: none"> <li>• Referenced in 20 interviews</li> <li>• Referenced 133 times in all interviews.</li> </ul> | Psychological impact             | 11 | 40 |
|                                                                                                                                    | Returning to normality           | 20 | 82 |

# Reporting checklist for qualitative study.

Based on the SRQR guidelines.

## Instructions to authors

Complete this checklist by entering the page numbers from your manuscript where readers will find each of the items listed below.

Your article may not currently address all the items on the checklist. Please modify your text to include the missing information. If you are certain that an item does not apply, please write "n/a" and provide a short explanation.

Upload your completed checklist as an extra file when you submit to a journal.

In your methods section, say that you used the SRQR reporting guidelines, and cite them as:

O'Brien BC, Harris IB, Beckman TJ, Reed DA, Cook DA. Standards for reporting qualitative research: a synthesis of recommendations. *Acad Med.* 2014;89(9):1245-1251.

|                     | Reporting Item                                                                                                                                                                                                                                          | Page Number |
|---------------------|---------------------------------------------------------------------------------------------------------------------------------------------------------------------------------------------------------------------------------------------------------|-------------|
| <b>Title</b>        |                                                                                                                                                                                                                                                         |             |
|                     | <a href="#">#1</a> Concise description of the nature and topic of the study identifying the study as qualitative or indicating the approach (e.g. ethnography, grounded theory) or data collection methods (e.g. interview, focus group) is recommended | 1           |
| <b>Abstract</b>     |                                                                                                                                                                                                                                                         |             |
|                     | <a href="#">#2</a> Summary of the key elements of the study using the abstract format of the intended publication; typically includes background, purpose, methods, results and conclusions                                                             | 4           |
| <b>Introduction</b> |                                                                                                                                                                                                                                                         |             |
| Problem formulation | <a href="#">#3</a> Description and significance of the problem / phenomenon studied: review of relevant theory and empirical work; problem statement                                                                                                    | 7           |

|    |                              |                     |                                                           |    |
|----|------------------------------|---------------------|-----------------------------------------------------------|----|
| 1  | Purpose or research          | <a href="#">#4</a>  | Purpose of the study and specific objectives or           | 7  |
| 2  | question                     |                     | questions                                                 |    |
| 3  |                              |                     |                                                           |    |
| 4  | <b>Methods</b>               |                     |                                                           |    |
| 5  |                              |                     |                                                           |    |
| 6  |                              |                     |                                                           |    |
| 7  | Qualitative approach and     | <a href="#">#5</a>  | Qualitative approach (e.g. ethnography, grounded          | 9  |
| 8  | research paradigm            |                     | theory, case study, phenomenology, narrative research)    |    |
| 9  |                              |                     | and guiding theory if appropriate; identifying the        |    |
| 10 |                              |                     | research paradigm (e.g. postpositivist, constructivist /  |    |
| 11 |                              |                     | interpretivist) is also recommended; rationale. The       |    |
| 12 |                              |                     | rationale should briefly discuss the justification for    |    |
| 13 |                              |                     | choosing that theory, approach, method or technique       |    |
| 14 |                              |                     | rather than other options available; the assumptions      |    |
| 15 |                              |                     | and limitations implicit in those choices and how those   |    |
| 16 |                              |                     | choices influence study conclusions and transferability.  |    |
| 17 |                              |                     | As appropriate the rationale for several items might be   |    |
| 18 |                              |                     | discussed together.                                       |    |
| 19 |                              |                     |                                                           |    |
| 20 |                              |                     |                                                           |    |
| 21 |                              |                     |                                                           |    |
| 22 |                              |                     |                                                           |    |
| 23 |                              |                     |                                                           |    |
| 24 |                              |                     |                                                           |    |
| 25 |                              |                     |                                                           |    |
| 26 | Researcher characteristics   | <a href="#">#6</a>  | Researchers' characteristics that may influence the       | 10 |
| 27 | and reflexivity              |                     | research, including personal attributes, qualifications / |    |
| 28 |                              |                     | experience, relationship with participants, assumptions   |    |
| 29 |                              |                     | and / or presuppositions; potential or actual interaction |    |
| 30 |                              |                     | between researchers' characteristics and the research     |    |
| 31 |                              |                     | questions, approach, methods, results and / or            |    |
| 32 |                              |                     | transferability                                           |    |
| 33 |                              |                     |                                                           |    |
| 34 |                              |                     |                                                           |    |
| 35 |                              |                     |                                                           |    |
| 36 |                              |                     |                                                           |    |
| 37 | Context                      | <a href="#">#7</a>  | Setting / site and salient contextual factors; rationale  | 10 |
| 38 |                              |                     |                                                           |    |
| 39 |                              |                     |                                                           |    |
| 40 | Sampling strategy            | <a href="#">#8</a>  | How and why research participants, documents, or          | 9  |
| 41 |                              |                     | events were selected; criteria for deciding when no       |    |
| 42 |                              |                     | further sampling was necessary (e.g. sampling             |    |
| 43 |                              |                     | saturation); rationale                                    |    |
| 44 |                              |                     |                                                           |    |
| 45 |                              |                     |                                                           |    |
| 46 | Ethical issues pertaining to | <a href="#">#9</a>  | Documentation of approval by an appropriate ethics        | 11 |
| 47 | human subjects               |                     | review board and participant consent, or explanation for  |    |
| 48 |                              |                     | lack thereof; other confidentiality and data security     |    |
| 49 |                              |                     | issues                                                    |    |
| 50 |                              |                     |                                                           |    |
| 51 |                              |                     |                                                           |    |
| 52 |                              |                     |                                                           |    |
| 53 | Data collection methods      | <a href="#">#10</a> | Types of data collected; details of data collection       | 10 |
| 54 |                              |                     | procedures including (as appropriate) start and stop      |    |
| 55 |                              |                     | dates of data collection and analysis, iterative process, |    |
| 56 |                              |                     | triangulation of sources / methods, and modification of   |    |
| 57 |                              |                     |                                                           |    |
| 58 |                              |                     |                                                           |    |
| 59 |                              |                     |                                                           |    |
| 60 |                              |                     |                                                           |    |

|    |                              |                                                                           |    |
|----|------------------------------|---------------------------------------------------------------------------|----|
| 1  |                              | procedures in response to evolving study findings;                        |    |
| 2  |                              | rationale                                                                 |    |
| 3  |                              |                                                                           |    |
| 4  | Data collection              | <a href="#">#11</a> Description of instruments (e.g. interview guides,    | 11 |
| 5  | instruments and              | questionnaires) and devices (e.g. audio recorders)                        |    |
| 6  | technologies                 | used for data collection; if / how the instruments(s)                     |    |
| 7  |                              | changed over the course of the study                                      |    |
| 8  |                              |                                                                           |    |
| 9  |                              |                                                                           |    |
| 10 |                              |                                                                           |    |
| 11 | Units of study               | <a href="#">#12</a> Number and relevant characteristics of participants,  | 16 |
| 12 |                              | documents, or events included in the study; level of                      |    |
| 13 |                              | participation (could be reported in results)                              |    |
| 14 |                              |                                                                           |    |
| 15 |                              |                                                                           |    |
| 16 | Data processing              | <a href="#">#13</a> Methods for processing data prior to and during       | 11 |
| 17 |                              | analysis, including transcription, data entry, data                       |    |
| 18 |                              | management and security, verification of data integrity,                  |    |
| 19 |                              | data coding, and anonymisation / deidentification of                      |    |
| 20 |                              | excerpts                                                                  |    |
| 21 |                              |                                                                           |    |
| 22 |                              |                                                                           |    |
| 23 |                              |                                                                           |    |
| 24 | Data analysis                | <a href="#">#14</a> Process by which inferences, themes, etc. were        | 11 |
| 25 |                              | identified and developed, including the researchers                       |    |
| 26 |                              | involved in data analysis; usually references a specific                  |    |
| 27 |                              | paradigm or approach; rationale                                           |    |
| 28 |                              |                                                                           |    |
| 29 |                              |                                                                           |    |
| 30 |                              |                                                                           |    |
| 31 | Techniques to enhance        | <a href="#">#15</a> Techniques to enhance trustworthiness and credibility | 11 |
| 32 | trustworthiness              | of data analysis (e.g. member checking, audit trail,                      |    |
| 33 |                              | triangulation); rationale                                                 |    |
| 34 |                              |                                                                           |    |
| 35 |                              |                                                                           |    |
| 36 | <b>Results/findings</b>      |                                                                           |    |
| 37 |                              |                                                                           |    |
| 38 |                              |                                                                           |    |
| 39 | Syntheses and                | <a href="#">#16</a> Main findings (e.g. interpretations, inferences, and  | 16 |
| 40 | interpretation               | themes); might include development of a theory or                         |    |
| 41 |                              | model, or integration with prior research or theory                       |    |
| 42 |                              |                                                                           |    |
| 43 |                              |                                                                           |    |
| 44 | Links to empirical data      | <a href="#">#17</a> Evidence (e.g. quotes, field notes, text excerpts,    | 16 |
| 45 |                              | photographs) to substantiate analytic findings                            |    |
| 46 |                              |                                                                           |    |
| 47 |                              |                                                                           |    |
| 48 | <b>Discussion</b>            |                                                                           |    |
| 49 |                              |                                                                           |    |
| 50 | Intergration with prior      | <a href="#">#18</a> Short summary of main findings; explanation of how    | 29 |
| 51 | work, implications,          | findings and conclusions connect to, support, elaborate                   |    |
| 52 | transferability and          | on, or challenge conclusions of earlier scholarship;                      |    |
| 53 | contribution(s) to the field | discussion of scope of application / generalizability;                    |    |
| 54 |                              | identification of unique contributions(s) to scholarship in               |    |
| 55 |                              | a discipline or field                                                     |    |
| 56 |                              |                                                                           |    |
| 57 |                              |                                                                           |    |
| 58 |                              |                                                                           |    |
| 59 |                              |                                                                           |    |
| 60 |                              |                                                                           |    |



|    |                       |                     |                                                          |    |
|----|-----------------------|---------------------|----------------------------------------------------------|----|
| 1  | Limitations           | <a href="#">#19</a> | Trustworthiness and limitations of findings              | 30 |
| 2  |                       |                     |                                                          |    |
| 3  | <b>Other</b>          |                     |                                                          |    |
| 4  |                       |                     |                                                          |    |
| 5  | Conflicts of interest | <a href="#">#20</a> | Potential sources of influence of perceived influence on | 3  |
| 6  |                       |                     | study conduct and conclusions; how these were            |    |
| 7  |                       |                     | managed                                                  |    |
| 8  |                       |                     |                                                          |    |
| 9  |                       |                     |                                                          |    |
| 10 |                       |                     |                                                          |    |
| 11 | Funding               | <a href="#">#21</a> | Sources of funding and other support; role of funders in | 2  |
| 12 |                       |                     | data collection, interpretation and reporting            |    |
| 13 |                       |                     |                                                          |    |
| 14 |                       |                     |                                                          |    |

15 The SRQR checklist is distributed with permission of Wolters Kluwer © 2014 by the Association of  
16 American Medical Colleges. This checklist was completed on 05. October 2019 using  
17 <https://www.goodreports.org/>, a tool made by the [EQUATOR Network](#) in collaboration with  
18 [Penelope.ai](#)  
19  
20  
21  
22  
23  
24  
25  
26  
27  
28  
29  
30  
31  
32  
33  
34  
35  
36  
37  
38  
39  
40  
41  
42  
43  
44  
45  
46  
47  
48  
49  
50  
51  
52  
53  
54  
55  
56  
57  
58  
59  
60

# BMJ Open

## Patient Priorities in Relation to Surgery for Gastric Cancer: Qualitative Interviews with Gastric Cancer Surgery Patients to Inform the Development of a Core Outcome Set.

|                                 |                                                                                                                                                                                                                                                                                                                                                                                                                                                                                |
|---------------------------------|--------------------------------------------------------------------------------------------------------------------------------------------------------------------------------------------------------------------------------------------------------------------------------------------------------------------------------------------------------------------------------------------------------------------------------------------------------------------------------|
| Journal:                        | <i>BMJ Open</i>                                                                                                                                                                                                                                                                                                                                                                                                                                                                |
| Manuscript ID                   | bmjopen-2019-034782.R2                                                                                                                                                                                                                                                                                                                                                                                                                                                         |
| Article Type:                   | Original research                                                                                                                                                                                                                                                                                                                                                                                                                                                              |
| Date Submitted by the Author:   | 15-Jan-2020                                                                                                                                                                                                                                                                                                                                                                                                                                                                    |
| Complete List of Authors:       | Alkhaffaf, Bilal; Salford Royal NHS Foundation Trust, Department of Oesophago-Gastric Surgery; The University of Manchester, Division of Cancer Sciences, School of Medical Sciences, Faculty of Biology, Medicine and Health,<br>Blazeby, Jane; University of Bristol, Department of Social Medicine<br>Bruce, Iain; Manchester University Hospitals NHS Foundation Trust, Paediatric ENT Department<br>Morris, Rebecca L.; University of Manchester, Centre for Primary Care |
| <b>Primary Subject Heading</b>: | Surgery                                                                                                                                                                                                                                                                                                                                                                                                                                                                        |
| Secondary Subject Heading:      | Oncology, Qualitative research                                                                                                                                                                                                                                                                                                                                                                                                                                                 |
| Keywords:                       | Adult surgery < SURGERY, Gastrointestinal tumours < ONCOLOGY, ONCOLOGY, SURGERY                                                                                                                                                                                                                                                                                                                                                                                                |
|                                 |                                                                                                                                                                                                                                                                                                                                                                                                                                                                                |

SCHOLARONE™  
Manuscripts



I, the Submitting Author has the right to grant and does grant on behalf of all authors of the Work (as defined in the below author licence), an exclusive licence and/or a non-exclusive licence for contributions from authors who are: i) UK Crown employees; ii) where BMJ has agreed a CC-BY licence shall apply, and/or iii) in accordance with the terms applicable for US Federal Government officers or employees acting as part of their official duties; on a worldwide, perpetual, irrevocable, royalty-free basis to BMJ Publishing Group Ltd ("BMJ") its licensees and where the relevant Journal is co-owned by BMJ to the co-owners of the Journal, to publish the Work in this journal and any other BMJ products and to exploit all rights, as set out in our [licence](#).

The Submitting Author accepts and understands that any supply made under these terms is made by BMJ to the Submitting Author unless you are acting as an employee on behalf of your employer or a postgraduate student of an affiliated institution which is paying any applicable article publishing charge ("APC") for Open Access articles. Where the Submitting Author wishes to make the Work available on an Open Access basis (and intends to pay the relevant APC), the terms of reuse of such Open Access shall be governed by a Creative Commons licence – details of these licences and which [Creative Commons](#) licence will apply to this Work are set out in our licence referred to above.

Other than as permitted in any relevant BMJ Author's Self Archiving Policies, I confirm this Work has not been accepted for publication elsewhere, is not being considered for publication elsewhere and does not duplicate material already published. I confirm all authors consent to publication of this Work and authorise the granting of this licence.

## Title Page

# Patient Priorities in Relation to Surgery for Gastric Cancer: Qualitative Interviews with Gastric Cancer Surgery Patients to Inform the Development of a Core Outcome Set.

## Authors

Bilal Alkhaffaf<sup>1,2,3</sup>, Jane M Blazeby<sup>4</sup>, Iain A Bruce<sup>5,6</sup> Rebecca Morris<sup>7</sup>.

## Affiliations

<sup>1</sup>Department of Oesophago-Gastric Surgery, Manchester Royal Infirmary, Manchester University Hospitals NHS foundation Trust, Manchester, UK

<sup>2</sup>Department of Oesophago-Gastric Surgery, Salford Royal Hospital, Salford Royal NHS foundation Trust, Manchester, UK

<sup>3</sup>Division of Cancer Sciences, School of Medical Sciences, Faculty of Biology, Medicine and Health, University of Manchester, UK

<sup>4</sup>Centre for Surgical Research and Bristol NIHR Biomedical Research Centre, University of Bristol, UK

<sup>5</sup> Paediatric ENT Department, Royal Manchester Children's Hospital, Manchester University NHS Foundation Trust, Manchester Academic Health Science Centre, Manchester, UK

<sup>6</sup>Division of Infection, Immunity and Respiratory Medicine, Faculty of Biology, Medicine and Health, University of Manchester, UK

<sup>7</sup>NIHR Greater Manchester Patient Safety Translational Research Centre, Division of Population Health, Health Services Research & Primary Care, University of Manchester, Manchester, UK

**Corresponding Author**

Mr Bilal Alkhaffaf

Consultant Oesophago-Gastric Surgeon

Salford Royal Hospitals NHS Foundation Trust

Stott Lane

Salford

M6 8HD

E-mail: [bilal.alkhaffaf@srft.nhs.uk](mailto:bilal.alkhaffaf@srft.nhs.uk)

Telephone: +44 161 206 0449

**Author E-mail Addresses**

Jane M Blazeby – [j.m.blazeby@bristol.ac.uk](mailto:j.m.blazeby@bristol.ac.uk)

Iain A Bruce – [iain.bruce@mft.nhs.uk](mailto:iain.bruce@mft.nhs.uk)

Rebecca Morris – [rebecca.morris@manchester.ac.uk](mailto:rebecca.morris@manchester.ac.uk)

**Original manuscript date:** 05/10/2019

**Revised manuscript date :** 15/01/2020

**Reprints**

Reprints will not be available from the authors.

**Funding**

This study is funded by the National Institute for Health Research (NIHR) Doctoral Research Fellowship Grant (DRF-2015-08-023). JMB is partially funded by the NIHR Bristol Biomedical Research Centre

## Conflicts of Interest

The authors report no conflicts of interest.

## Disclaimer

This paper presents independent research funded by the National Institute for Health Research (NIHR). The views expressed are those of the author(s) and not necessarily those of the NHS, the NIHR or the Department of Health.

## Data Availability

Data are available upon reasonable request.

## Acknowledgements

The authors would like to thank all those who participated in this study. The authors would also like to highlight the role undertaken by Dr Aleksandra Metryka, Senior Clinical Trials Coordinator, who facilitated the running of the study.

## Author Contributorship Statement

Conceptualization - BA, JMB, IAB, RM; Data curation - BA; Formal analysis - BA, RM; Funding acquisition - BA, JMB, IAB; Investigation - BA, RM; Methodology - BA, IAB, RM; Project administration - BA, IAB, RM; Resources - BA, IAB; Software - BA; Supervision - JMB, IAB, RM; Validation - BA, RM; Visualization - BA, JMB, IAB, RM; Writing (original draft) - BA; Writing (review & editing) - BA, JMB, IAB, RM.

## Running Title

Patient Priorities Following Surgery for Gastric Cancer

**Word Count:** 5173

**Number of tables:** 3

**Number of appendices:** 2

## Structured Abstract

### Objective

The reporting of outcomes in surgical trials for gastric cancer is inconsistent. The GASTROS study (GAstric Cancer Surgery TRials Reported Outcome Standardisation) aims to address this by developing a core outcome set (COS) for use in all future trials within this field. A COS should reflect the views of all stakeholders, including patients. We undertook a series of interviews to identify outcomes important to patients which would be considered for inclusion in a COS.

### Setting

All interviews took place within the United Kingdom. Interviews were carried out face-to-face at hospitals and cancer support centres or via the telephone.

### Participants

Twenty participants at varying stages of recovery following surgery for gastric cancer with curative intent.

### Design

Qualitative design using semi-structured interviews, supported by an interview guide which was iteratively modified; thematic analysis was used to explore patient priorities.

### Results

Six themes enveloping 38 outcomes were identified; surviving and controlling cancer, technical aspects of surgery, adverse events from surgery, recovering from surgery, long-term problems following surgery and long-term life impact of surgery. The 'most important' patient priority was to be 'cured of cancer'.

### Conclusion

Surgical trials for gastric cancer should consider broader priorities of patients when choosing which outcomes to report. This study highlighted the importance of longer-term outcomes such as cancer

1  
2  
3 survival. Outcomes identified in this study will be used to inform an international Delphi survey to  
4  
5 develop a COS in this field.  
6  
7

8 **KEYWORDS:**  
9

10 Surgical Oncology  
11

12  
13 Stomach Neoplasms  
14

15  
16 Outcome Assessment  
17

18  
19 Patient Reported Outcome Measures  
20

21  
22 Treatment Outcome  
23

24  
25 Outcome reporting  
26  
27  
28  
29  
30  
31  
32  
33  
34  
35  
36  
37  
38  
39  
40  
41  
42  
43  
44  
45  
46  
47  
48  
49  
50  
51  
52  
53  
54  
55  
56  
57  
58  
59  
60



## Article Summary

### Strengths and Limitations of This Study

- This is the first in-depth qualitative study to examine the priorities and experiences of patients following potentially curative surgery for gastric cancer, and the first to establish which outcomes are important to patients.
- The study forms part of a larger project (The GASTROS Study - [www.gastrosstudy.org](http://www.gastrosstudy.org)) to develop a 'core outcome set' (COS) for use in surgical trials for gastric cancer and was reviewed and funded by the National Institute of Health Research (UK). The study is based on a reproducible and transparent methodology which has been subjected to critical appraisal during a peer-review process.
- The term 'outcome' was described to participants in a manner relatable to them, such that they understood it and were able to identify which outcomes were most important.
- The patient population was limited to UK-based English speakers. The views of international patients may vary due to differences in culture and clinical practice.

## Main Article

### Introduction

#### Background

Gastric cancer is a leading cause of cancer-related death world-wide<sup>1,2</sup>. Whilst surgery remains the only treatment which can offer a potential cure from this disease, it is associated with significant rates of morbidity in both the short and long-term<sup>3,4</sup>. Ideally, the optimal surgical approach would minimise the risk of short and long-term complications without jeopardising the oncological resection.

Identifying the optimal surgical approach for gastric cancer should be based on comparing and combining robust clinical evidence from well-designed randomised control trials. One of the present challenges to achieving this is the inconsistency in the reporting of outcomes in this field<sup>5</sup>. This limits evidence synthesis and contributes to 'research waste'. The GASTROS study (GASTROS – GAstric Cancer Surgery TRials Reported Outcome Standardisation - [www.gastrosstudy.org](http://www.gastrosstudy.org))<sup>6</sup> aims to address this issue by developing a 'core outcome set' (COS) – a *minimum* group of standardized and well-defined outcomes, measured by all future gastric cancer surgery trials<sup>7</sup>.

A guiding principle in the development of COS is that outcomes reflect the views and priorities of key stakeholders, including patients, to maximise the relevance and impact of future research. Previous studies have demonstrated variations in the views and priorities of clinicians and patients<sup>8-10</sup>, which can result in trials reporting outcomes which bear little relevance to patients. A systematic review of outcome reporting in surgical trials for gastric cancer has demonstrated that outcomes which may be important to gastric cancer patients, such as 'quality of life' after surgery are poorly represented within this field<sup>5</sup>. It is therefore important to understand which outcomes are important for patients undergoing gastric cancer surgery.

#### Objective

This research forms part of the GASTROS study, for which the protocol has been previously described<sup>6</sup>. The first stage in the study involves identifying a 'long-list' of potentially important outcomes which will be prioritised in stage two by participants undertaking a Delphi survey. It is not

1  
2  
3 known to what degree outcomes reported in previously published trials represent the priorities of  
4 patients undergoing gastric cancer surgery, and as such, solely relying on these as a source to populate  
5 the 'long-list' may overlook potentially important outcomes. By exploring the experiences,  
6 perceptions and priorities of patients who have undergone surgery for gastric cancer, this study aimed  
7 to identify outcomes which may not have been previously reported in the literature.  
8  
9  
10  
11  
12  
13  
14  
15  
16  
17  
18  
19  
20  
21  
22  
23  
24  
25  
26  
27  
28  
29  
30  
31  
32  
33  
34  
35  
36  
37  
38  
39  
40  
41  
42  
43  
44  
45  
46  
47  
48  
49  
50  
51  
52  
53  
54  
55  
56  
57  
58  
59  
60

For peer review only

## Methods

### Study Design

The role of qualitative research methods in the development of COS has been previously explored<sup>11</sup> and has been advocated by groups such as the COMET initiative<sup>7</sup> as one of several approaches to ensure that outcome lists being considered for prioritisation are exhaustive. This qualitative study used a semi-structured interview approach to achieve the primary objective of identifying outcomes of importance to patients. A series of open questions were used to facilitate a patient-led discussion, guided by additional prompts from a pre-prepared interview schedule (table 1) to ensure key areas were covered.

Additional focused questioning around the use of outcomes in research was also included. In the context of clinical research, terms such as ‘outcomes’ may not be well understood by patients<sup>11</sup> and so a mixture of open and closed questioning was important. Participant interviews were undertaken in series of three following which transcript analysis (see below) was undertaken and the interview schedule was modified iteratively. This ensured that areas raised by earlier participants, but not included in the original schedule, were covered in subsequent discussions.

### Sampling

The eligibility criteria for this study are summarized in table 2. A purposive sampling strategy was adopted across the following characteristics:

- Age (above and below 70 years).
- Gender (men and women)
- Time since surgery (less than a year, one to three years and more than three years)

Interviews were undertaken until ‘data-saturation’ was achieved. Data saturation was determined when there was no new data emerging that had interpretive value.

Participants were recruited from across the United Kingdom from three sources:

- 1
- 2
- 3 1. A regional specialist gastric cancer centre: patients were approached in the outpatient clinic
- 4 by their direct care team.
- 5
- 6
- 7 2. Patient organisations: patient groups were asked to contact their membership through e-mail
- 8 and social media.
- 9
- 10
- 11 3. Snowball sampling; patients who had been recruited or contacted to participate were asked to
- 12 identify other patients who would be interested in the study.
- 13
- 14
- 15
- 16
- 17
- 18

### 19 Data Collection

20 Interviews were undertaken between February and May 2017 and were conducted by BA, a  
21 consultant surgeon and researcher with approximately ten years' experience of managing and  
22 communicating with gastric cancer patients. Participants were invited to choose between a University  
23 Teaching Hospital, two purpose-built patient cancer centres, or their home for the location of the  
24 meeting. Participants were also offered the opportunity to have their interviews over the telephone.  
25 Participants were offered travel expenses to minimise any financial burden on taking part in the study.  
26

27 In addition to the purposive sampling strategy, the following demographic data was collected:

- 28 • Gender (male/female)
- 29 • Social circumstances (e.g. lives alone/with partner/lives with dependents)
- 30 • Age
- 31 • Time since surgery (in months)
- 32 • The type of gastrectomy (total or partial gastrectomy)
- 33 • The approach to their surgery (open or laparoscopic)
- 34 • Whether they had undergone additional treatment (e.g. chemotherapy)
- 35 • Whether they had suffered a post-operative complication
- 36 • Ethnicity
- 37 • Previous trial enrolment
- 38 • Participant post-code (to identify location and social deprivation score)
- 39
- 40
- 41
- 42
- 43
- 44
- 45
- 46
- 47
- 48
- 49
- 50
- 51
- 52
- 53
- 54
- 55
- 56
- 57
- 58
- 59
- 60

1  
2  
3 Full written consent was taken immediately prior to the interview and the participant was reminded  
4 that they were able to stop at any point or withdraw from the study without needing to give a reason.  
5  
6

## 7 8 Data Analysis 9

10 All interviews were digitally recorded and professionally transcribed (intelligent verbatim  
11 transcription). A thematic analysis was used to identify emerging themes and was guided by a general  
12 inductive approach<sup>12,13</sup>. This was used to create the framework applied to subsequent interviews.  
13  
14

15 Themes were developed using a three-step approach of open coding, axial coding and selective  
16 coding<sup>14</sup> of the transcripts. Given the objective of this study was to identify themes and outcomes not  
17 previously reported in trials, it was important not to base data analysis and outcome identification on  
18 a framework built on previously published literature. BA and RM (a researcher with significant  
19 experience in qualitative research methods) independently analysed the first two transcripts and  
20 through discussion identified themes and adjustments to the interview schedule. There were no  
21 disagreements about coding, but had there been, these would have been discussed with the study  
22 management team. The final themes were agreed by all authors through discussion. Data analysis was  
23 supported using NVivo 11 ([http://www.qsrinternational.com/products\\_nvivo.aspx](http://www.qsrinternational.com/products_nvivo.aspx), QSR International,  
24 Burlington, MA, USA).  
25  
26  
27  
28  
29  
30  
31  
32  
33  
34  
35  
36  
37  
38  
39

## 40 Approvals and Portfolio Adoption

41 The study was given ethical approval by the National Research Ethics Service North West—Cheshire  
42 (11/NW/0739) and governance approvals by Central Manchester University Hospital NHS  
43 Foundation Trust. The study was adopted by the National Institute for Health Research (NIHR)  
44 Clinical Research Network Portfolio (ID 33312).  
45  
46  
47  
48  
49  
50

## 51 Reporting

52 This paper uses the SRQR checklist to structure the report of the study findings<sup>15</sup>.  
53  
54  
55

## 56 Patient and Public involvement

57 A Study Advisory Group (SAG) forms part of the management structure of the wider GASTROS  
58 study<sup>6</sup>, of which this qualitative study forms part of the first stage. The SAG is made up of key  
59  
60

1  
2  
3 stakeholder representatives including patients, oncology nurses and surgeons. The group provides  
4  
5 advice on the methodology of the study, general delivery of the study against its stated objectives and  
6  
7 ensures that the viewpoints of all stakeholder groups are considered. The results of this study were  
8  
9 presented to a SAG meeting; the ensuing discussion influenced the design of the next stage of the  
10  
11 study in preparation for an international Delphi Survey.  
12

13  
14 Best practice guidelines for patient and public engagement were followed as set out by INVOLVE  
15  
16 (part of and funded by the United Kingdom's National Institute for Health Research)<sup>16</sup>.  
17  
18  
19  
20  
21  
22  
23  
24  
25  
26  
27  
28  
29  
30  
31  
32  
33  
34  
35  
36  
37  
38  
39  
40  
41  
42  
43  
44  
45  
46  
47  
48  
49  
50  
51  
52  
53  
54  
55  
56  
57  
58  
59  
60

For peer review only

**Table 1. Interview schedule.**

|    |                                                                                                                                                                                                                                                                                                                                                                                                    |
|----|----------------------------------------------------------------------------------------------------------------------------------------------------------------------------------------------------------------------------------------------------------------------------------------------------------------------------------------------------------------------------------------------------|
| 1. | I understand you have (had) gastric cancer. Can you tell me about that?                                                                                                                                                                                                                                                                                                                            |
| 2. | <p><i>Could you tell me about how you first found out you had gastric cancer?</i></p> <p>Prompts:</p> <ul style="list-style-type: none"> <li>• <i>What questions did you most want to ask, when you were told that you had gastric cancer?</i></li> </ul>                                                                                                                                          |
| 3  | <p>Were there were any areas you wanted more information about but were unable to find?</p> <p>Prompts:</p> <ul style="list-style-type: none"> <li>• <i>Were you given any leaflets at the time of diagnosis? Did you find these useful?</i></li> </ul>                                                                                                                                            |
| 4  | <p>What treatment was offered and how you decide about undergoing treatment.</p> <p>Prompts:</p> <ul style="list-style-type: none"> <li>• <i>What information did you want about the treatment you would be receiving?</i></li> <li>• <i>What factors did you consider when deciding on the treatment?'</i></li> </ul>                                                                             |
| 5  | <p>What effects did the treatment have on you after surgery?</p> <p>Prompts:</p> <ul style="list-style-type: none"> <li>• <i>Did the treatment affect your physical or mental well-being?</i></li> <li>• <i>Did the treatment have an effect on relationships with those around you?</i></li> <li>• <i>Did you have to make any changes to your behaviour as a result of treatment?</i></li> </ul> |
| 6  | <p>What long-term effects did the treatment have on you?</p> <p>Prompts:</p> <ul style="list-style-type: none"> <li>• <i>Did the treatment affect your physical or mental well-being?</i></li> <li>• <i>Did the treatment have an effect on relationships with those around you?</i></li> <li>• <i>Did you have to make any changes to your behaviour as a result of treatment?</i></li> </ul>     |
| 7  | What was the worst side effect of treatment?                                                                                                                                                                                                                                                                                                                                                       |
| 8  | What are your concerns for the future, especially those relating to their diagnosis/history of gastric cancer?                                                                                                                                                                                                                                                                                     |



|    |                                                                                                                                                                                                           |
|----|-----------------------------------------------------------------------------------------------------------------------------------------------------------------------------------------------------------|
| 9  | Did the explanation of what you should expect from surgery match your real experience?                                                                                                                    |
| 10 | In the context of research studies, can you explain what an outcome is in your own words?<br>The interviewer will then provide a definition of the term 'outcome' is in the context of clinical research. |
| 11 | What, in your opinion, is the most important outcome to measure in gastric cancer surgery trials?                                                                                                         |
| 12 | Are there any other outcomes which may be important to measure?                                                                                                                                           |
| 13 | Has your perspective on what is important changed over time?                                                                                                                                              |
| 14 | Is there anything else that you feel is important to talk about that we have not discussed?                                                                                                               |

**Table 2. Eligibility criteria for study participants.**

|              | Potential Participants Approached                                                                                                                                                 | Potential Participants Not Approached                                                                                                                                                                       |
|--------------|-----------------------------------------------------------------------------------------------------------------------------------------------------------------------------------|-------------------------------------------------------------------------------------------------------------------------------------------------------------------------------------------------------------|
| Participant  | <ul style="list-style-type: none"> <li>• Male and females aged 18 years and older.</li> <li>• Individuals able to participate in an interview in the English language.</li> </ul> | <ul style="list-style-type: none"> <li>• Patients unable to give informed consent</li> <li>• Patients too unwell to comfortably participate in an interview lasting approximately 30-60 minutes.</li> </ul> |
| Pathology    | <ul style="list-style-type: none"> <li>• Adenocarcinoma and squamous cell carcinoma of the stomach, (which makes up 95 per cent of all stomach tumours).</li> </ul>               | <ul style="list-style-type: none"> <li>• Gastrointestinal Stromal Tumours</li> <li>• Neuro-endocrine tumours</li> <li>• Lymphoma</li> <li>• Benign disease</li> </ul>                                       |
| Intervention | <ul style="list-style-type: none"> <li>• Total and partial gastrectomy</li> <li>• Open and laparoscopic approaches</li> </ul>                                                     | <ul style="list-style-type: none"> <li>• Surgery with palliative intent</li> <li>• Endoscopic therapies such as EMR (endoscopic mucosal resection) and ESD (endoscopic Submucosal dissection)</li> </ul>    |

## Results

### Overview

In total, 20 patients were interviewed. Table 3 summarises demographic data and treatment-related characteristics of participants. Interviews lasted a median of 50.5 minutes (29-75 minutes). No patients withdrew from the study. Data saturation was deemed to have been reached by 20 interviews; one new outcome was identified in interview number 18 (related to sexual activity), however, no further outcomes were identified from the following two transcripts.

### Outcome Themes

Six broad themes enveloping 38 outcomes were identified;

1. Surviving and controlling cancer,
2. Technical aspects of surgery,
3. Adverse events from surgery,
4. Recovering from surgery,
5. Long-term problems following surgery and
6. Long-term life impact of surgery.

Appendix 1 provides a breakdown of how all themes were developed from outcomes identified during the interviews. Themes were well represented in each interview; each theme was discussed by at least 18 of 20 participants. Appendix 2 demonstrated the outcomes identified during the interviews and how often they were referenced.

#### *Theme 1: Surviving and controlling cancer*

For most, details of their initial consultation were sketchy; participants often described being given lots of information about their diagnosis, much of which was not absorbed. However, patients clearly remember their reaction to being told their cancer diagnosis; for most, the response was the same:

“When you hear the word, cancer, you think that’s it. I’m going to die.” (participant 6)

There was a range of personal experience with cancer within our patient group. Some had direct family members who had undergone chemotherapy and had an intimate knowledge of its effects.

1  
2  
3 “it was my worst nightmare come true because I lost my dad to cancer and I always had it in  
4 the back of my mind, well if one person in the family could get cancer from somewhere then  
5 we could as well.” (participant 19)  
6  
7  
8  
9

10 Some patients had a vague knowledge of friends or work colleagues who had undergone treatments  
11 for cancer and others had no prior experience of cancer at all. Despite these differences, the initial  
12 responses to their diagnosis were similar.  
13  
14  
15

16  
17 All participants in our study had undergone radical surgery with curative intent. At the time of  
18 interview, no participants had confirmed evidence of disease recurrence although one was being  
19 investigated for potential recurrence. Once the discussion with their surgeon moved away from the  
20 diagnosis and onto potentially curative treatments, participants often focused their questions on  
21 ‘survival’:  
22  
23  
24  
25  
26

27  
28 “I wanted to know what the chances were of me having this removed and not, well, basically  
29 not dying from it.” (participant 4)  
30  
31  
32

33 Despite radical surgery (and peri-operative chemotherapy in half of our participants), for many of the  
34 participants the fear of recurrence remained a permanent anxiety. Many participants seemed to  
35 understand that due to the aggressive nature of gastric cancer, recurrence is a possibility for many:  
36  
37  
38  
39

40 “...you’re always worried that it’s going to come back...” (participant 7)  
41  
42

43 The study cohort included participants who had undergone surgery between 5 months and 14 years  
44 prior to the interviews. There did not seem to be a relationship between the length of time out of  
45 surgery and concerns about cancer recurrence.  
46  
47  
48  
49

### 50 *Theme 2: Technical aspects of surgery*

51  
52 Several outcomes related to this theme were discussed by participants. Most importantly, participants  
53 focused on whether the surgical team was able to excise the ‘cancer’ in its entirety. This priority was  
54 often referenced in relation to the ‘success’ of surgery and its contribution to ‘curing’ participants of  
55 cancer:  
56  
57  
58  
59  
60

1  
2  
3           “...thinking to yourself that, you know, everything has been done to the best of the hospital’s  
4           ability, and, you know, they’ve taken absolutely everything out.” (participant 4)  
5  
6

7 Whilst participants mostly referred to the cancer as a single ‘entity’, there were a small number who  
8 demonstrated some knowledge of the importance of different aspects of surgery such as lymph node  
9 excision:  
10  
11

12           “And yeah, I remember the news about the pathology on the bits they’d taken away, and the  
13           lymph node system and what not, came a week or two before I was due to go back on the  
14           chemo.” (participant 20)  
15  
16  
17  
18

19 Six participants underwent a minimally invasive surgery with the remainder undergoing open surgery.  
20 The size of the wounds or type of surgical approach was referred to by only a minority of our  
21 participants. In the main, these were made in passing as little importance was placed on the surgical  
22 approach:  
23  
24  
25  
26  
27

28           Interviewer: “Okay, and what...what did that mean for you to have keyhole surgery?”  
29

30           Respondent: “It didn’t mean anything really, you know, I had...I’d heard about keyhole and  
31           people who’d had it.” (participant 5)  
32  
33  
34  
35  
36

### 37 *Theme 3: Adverse events following surgery*

38

39 Eleven participants suffered a complication following surgery; however, this theme was important to  
40 all interviewees. Peri-operative death was the most frequently discussed surgical complication:  
41  
42

43           “...the fear of dying on the operating table is really real.” (participant 2)  
44  
45  
46

47 During their surgical consultation, participants retained some understanding of the risk of peri-  
48 operative death and many were able to quote figures about how likely this complication was. Other  
49 complications were highlighted when recounting a personal experience. While all complications  
50 occurred in the post-operative period, there were several different causes attributed to these events  
51 (e.g. direct surgical, anaesthesia-related and medication-related). The severity and consequences of  
52 the complications also varied significantly; some were self-limiting and resulted in a minor extension  
53 of the length of hospital stay:  
54  
55  
56  
57  
58  
59  
60

1  
2  
3 “But I was out of it for three days, I was just hallucinating and God knows what, probably  
4 because of the morphine.” (participant 7)  
5  
6  
7

8 And those which were life-threatening and required significant clinical intervention:  
9

10 “It was a twisted bowel. Yeah, I was told it was a twisted bowel. Because I always  
11 remember that when they brought me back from obviously having a look and everything, I  
12 always remember [they] said...we're going to have to take you back to surgery.” (participant  
13 15)  
14  
15  
16  
17  
18  
19

20 The severity of the complications suffered did not seem to shape the key priorities in relation to  
21 participants' ‘worst side effect’ of surgery or ‘most important outcome’; these almost entirely related  
22 to ‘long-term impacts of surgery’ and ‘cure’ respectively (see below) regardless of how long ago their  
23 operation was and which surgical approach (laparoscopic or open surgery) was employed.  
24  
25  
26  
27  
28

29 Whilst participants recounted that some of the more serious complications (e.g. death, anastomotic  
30 leak and cardio-pulmonary complications) were described by surgeons during the consent process,  
31 some were exposed to other sources of information in the pre-operative stage. Participants were  
32 regularly provided with written information about their cancer and its management, however the  
33 quality and content of this varied depending on the location of their hospital. The response to this  
34 format was varied:  
35  
36  
37  
38  
39  
40  
41

42 “I’m going to be honest with you, I didn’t actually read them... because I didn’t want things  
43 going in my head that I couldn’t take in.” (participant 17)  
44  
45  
46

47 Participants that read the written information often found them difficult to digest for several reasons  
48 including the volume of information and fear of the gravity of the diagnosis or prognosis:  
49

50  
51 “Well some of it were just waste of time, but others, you know, if you’ve got a book about that  
52 thick and you read through it and half of it applies to you, and the others just sort...doesn’t  
53 apply, you know.” (participant 5)  
54  
55  
56  
57  
58  
59  
60

1  
2  
3 “As much as it’s alright handing leaflets out, I can...I am a bit of a reader so I will read stuff,  
4 but when you think you’ve got a death sentence you think, what’s the point in reading that?”  
5  
6  
7 (participant 13)  
8  
9

10  
11 Several hospitals had patient-support groups which provide a ‘buddy’ system for those awaiting  
12 surgery. These support groups became an important part of the recovery process and continue to be  
13 relevant many years after surgery. Patients found these more useful as they had the opportunity to  
14 speak to those with lived experience of the diagnosis and treatment. Whilst this served as an important  
15 source of information to tackle the longer-term impacts of surgery (below), these groups also provided  
16 comfort to patients:  
17  
18  
19  
20  
21  
22  
23  
24

25 “I think the support group and speaking to people that have been through it, because it can  
26 demystify it quite a lot.” (participant 2)  
27  
28

29 Peer support also provided additional sources of information to participants in the pre-operative period  
30 with respect to some of the complications that could arise:  
31  
32

33 “And I know one guy, where the oesophagus junction was, he’d had that leaking, and he  
34 couldn’t eat more than, like, grains of rice and things; so that would be pretty horrendous.”  
35  
36  
37 (participant 4)  
38  
39

40 As a result of verbal and written information from healthcare professionals and additional peer support,  
41 participants were able to describe key adverse without necessarily having experienced them firsthand.  
42  
43  
44  
45

#### 46 *Theme 4: Recovery from surgery*

47

48 Experiences during the immediate post-operative recovery period were referenced by 18 study  
49 participants. Whilst some participants’ experience of recovery from surgery was directly linked to  
50 complications, there were aspects of recovery such as post-operative pain, mobility and the  
51 recommencement oral intake that were common amongst all those who spoke this theme.  
52  
53  
54  
55  
56  
57  
58  
59  
60

1  
2  
3 Most participants did not mention post-operative pain as an important focus. Those that did, expected  
4 to suffer a degree of pain, however experiences of its severity varied widely. Pain levels amongst  
5 interviewees who had undergone similar operations through laparotomy incisions were not uniform.  
6  
7

8  
9 One participant who had open surgery described:

10  
11 “I do remember waking up and really being in a hell of a lot of pain and being really out  
12 of it.” (participant 6)  
13  
14

15  
16 Whilst another who had undergone their surgery using the same approach recounted:

17  
18 “I didn't really have much pain.” (participant 14)  
19

20 Discussions around post-operative pain were not confined to discomfort from the surgical incisions, but  
21 also related to post-operative complications:  
22

23  
24 “I was back in writhing in agony with a serious infection in the wound.” (participant 9)  
25

26 Participants recounted the limitations in their mobility during the post-operative period. There were  
27 many factors contributing to this, including physical weakness, not receiving appropriate  
28 encouragement to mobilise and being restricted by surgical drains:  
29  
30

31  
32 “...really difficult to be mobile I suppose, and move around, yourself, ‘cause obviously you’ve  
33 got quite a lot of tubes and different things coming out. I felt very, very swollen.” (participant  
34 6)  
35  
36  
37  
38  
39  
40

#### 41 *Theme 5: Long-term problems following surgery*

42  
43 All participants described significant long-term symptoms related to surgery. For the most, this  
44 represented the ‘worst side effect’ in relation to their treatment and outcomes from this theme were  
45 referenced more than any other theme further emphasising its importance. All participants described  
46 experience with struggling to eat and drink following surgery and the majority (16/20) talked  
47 extensively about the impact of fatigue on their daily lives. Problems with maintaining weight, issues  
48 with ongoing gastro-intestinal symptoms and chronic pain were discussed by most participants.  
49  
50  
51  
52  
53  
54  
55  
56  
57  
58  
59  
60



1  
2  
3 Fatigue was described in many ways; 'exhaustion', 'feeling tired all the time', 'feeling so weak' and  
4 'having no energy'. For the main, fatigue was a symptom which persisted for months after surgery and  
5 could impact on a participant's ability to undertake day-to-day activities or to socialise:  
6  
7

8  
9 "Well, I'm so weak, I used to go out, you know, and do fishing and do things with my lads. I'm  
10 just getting that little bit better now after eight months, but I'm so weak and tired." (participant  
11 18)  
12  
13  
14

15  
16  
17  
18 Adapting to fatigue was and for many continued to be a difficult challenge, however many participants  
19 understood that this was a recognised and acceptable symptom to them given the magnitude of the  
20 surgery:  
21  
22

23  
24 "I've come out with...more...appreciation for looking after myself and my...And if I'm tired, I  
25 stop." (participant 15)  
26  
27  
28  
29

30  
31 There were several causes for the struggles participants associated with eating and drinking.  
32 Participants often described having to eat and drink smaller volumes more frequently and some were  
33 unable to tolerate certain food types or consistencies. This had a direct effect on the pleasure associated  
34 with eating and an impact on where participants could eat:  
35  
36  
37

38  
39 "Well I don't eat what I would like to...But I know that for the rest of my life, I won't be able  
40 to go out for big meals, to big venues and eat like I used to eat before, you know." (participant  
41 5)  
42  
43  
44  
45

46  
47 Most participants recounted being told prior to their surgery that their diet would be different and that  
48 they would have to 'learn how to eat again'. Despite this, some participants felt that not enough  
49 information was given to highlight the true impact of this long-term issue and methods to address it:  
50  
51

52  
53 "I think it's a lot worse than what they tell you. Because like some days, I'll eat a certain thing  
54 which I've ate before, and you just can't breathe properly, it's choking you." (participant 18)  
55  
56  
57  
58  
59  
60

1  
2  
3 A broad range of gastro-intestinal symptoms were reported by participants. The time frame relating to  
4 how long these persisted was similarly broad (sometimes months and years) and did not seem to follow  
5 a pattern. Nausea, vomiting, diarrhoea, reflux and belching were the commonest problems described.  
6  
7 Many of these symptoms resulted in significant impacts on quality of life (see theme 6 below):  
8  
9

10  
11 “...I still get the bile reflux and I get this constant pain in the oesophagus which affects my  
12 sleeping as well.” (participant 7)  
13  
14

15  
16  
17  
18 “The dumping syndrome was mentioned. Never understood it until it happened. You know,  
19 how my body reacted to certain foods that I'd normally eat that it doesn't like anymore.”  
20  
21 (participant 15)  
22  
23  
24  
25

#### 26 *Theme 6: Long-term life impact of surgery*

27  
28 The long-term effects on ‘normality’, quality of life, and psychological impact of surgery were  
29 discussed extensively by all patients. A strong desire to return to a form of ‘normality’ was regularly  
30 expressed. Whilst the reference point for ‘normality’ differed amongst patients, common characteristics  
31 existed; namely a desire to do what they used to do such as working, exercising, socialising with friends  
32 and family and being able to travel:  
33  
34  
35  
36  
37  
38

39 “it’s about living as I did before, and forgetting what had happened, and I do that quite often.”  
40  
41 (participant 6)  
42  
43  
44  
45

46 The experience of returning to normality varied amongst those interviewed. Many participants were  
47 largely able to return to their ‘normal’ activities albeit with some modifications:  
48  
49

50 “Yes. I want to go on holidays again. I love cruises and I want...but until my eating’s  
51 improved, I wouldn’t do that.” (participant 1)  
52  
53  
54  
55

56 “Now that it’s 18 months on, I am back to having what would be a normal life again, now,  
57 albeit with smaller portions of meals and things” (participant 4)  
58  
59  
60

1  
2  
3 Some participants however have not been able to return to activities that provided them with significant  
4  
5 enjoyment:

6  
7 “I’ve never actually got back to my normal activity. I’ve never played golf since that day and  
8  
9 I used to love golf.” (participant 4)  
10

11  
12  
13 In general, participants understood that life after gastrectomy would be different:

14  
15 “I’m still alive, and then I need to get back to normal. It takes a while for you to realise your  
16  
17 new normality is not like your old normality.” (participant 2)  
18  
19

20  
21  
22 Whilst much of the discussion relating to ‘normality’ centred around specific tasks which participants  
23  
24 valued or missed, the impact of gastrectomy on a participant’s overall general quality of life was  
25  
26 important to many. Many understood that quality of life needed to be redefined in comparison to life  
27  
28 before surgery, but nonetheless there was a minimum level that would need to be achieved:  
29

30  
31 “if I have some sort of quality of life, where I can get up and wash myself and do, that is  
32  
33 something that I’d live for. But I couldn’t be sat there and nursed 24/7” (participant 17)  
34  
35

36  
37 The psychological burden on participants following gastrectomy is a significant one. Each of the  
38  
39 previously discussed themes could impact on a participant’s mental state and whilst certain phases of  
40  
41 the treatment pathway were time-limited, the psychological effects could persist for much longer;

42  
43 “You don’t just suffer from physical; you suffer from mental. And I think the mental is a lot  
44  
45 more powerful than the physical, because you can shut pain off by taking medication, but it’s  
46  
47 very hard to shut problems off mentally.” (participant 18)  
48  
49

50  
51 “You know, ‘cause psychologically you think you’ve still got this poison in your body, as much  
52  
53 as I’ve got rid of, you know, my monster.” (participant 13)  
54  
55

56 Some of the psychological impacts were associated with participants having to adapt to a new normality  
57  
58 in relation to what they were able to do, what they were able to eat, how they looked physically or how  
59  
60 they felt around others:

1  
2  
3 “Well, it was a problem because like I say, I've always been a proud chap and proud of my body  
4 because I kept myself fit and everything. When I looked in the mirror, quite distressing. That  
5 was it, yeah. It makes you feel inferior.” (participant 18)  
6  
7  
8  
9

10  
11 “I feel a freak, I feel when I go into a big room with people that everybody has got a stomach  
12 and I haven't got one, it's not that I want them to know, but I just don't feel the same  
13 anymore...” (participant 8)  
14  
15  
16  
17

### 18 19 20 Definition of 'outcome' by patients

21 All participants were asked what their understanding of the term 'outcome' was in the context of  
22 clinical research. Two participants were able to provide a broad-ranging definition which  
23 encompassed some of the benefits and adverse effects of treatment:  
24  
25  
26  
27

28  
29 “my perception of what would be meant by that phrase would...at a variety of levels; it could  
30 be does the patient live or die? Does the patient recover to an acceptable state for an extended  
31 period of time, and my understanding of what that might be, would be a, sort of, five year  
32 period...” (participant 20)  
33  
34  
35  
36  
37

38 One person stated that they did not know how to define the term, whilst the remainder defined  
39 'outcome' by recounting a single outcome, which was most important to them:  
40  
41

42  
43 “Okay, my understanding is that at the...the outcome would be that the cancer would be  
44 possibly all gone.” (participant 19)  
45  
46  
47  
48

49 Participants were asked to provide a single outcome that was 'most important to them'. Fifteen  
50 participants identified that the most important outcome was that they were 'cured of cancer' with the  
51 remaining five describing outcomes related to 'returning to normal' and being able to enjoy a 'good  
52 quality of life'. These priorities did not alter with respect to how long-ago surgery was performed,  
53 which approach was undertaken or how old the patient was.  
54  
55  
56  
57  
58  
59  
60

**Table 3. Patient characteristics and demographic data.**

| Patient | Sex | Age | Ethnicity<br>* | Social<br>deprivation<br>quintile** | Home<br>circumstances  | Months<br>since<br>surgery | Type of surgery     | Approach to<br>surgery | Post-operative<br>complications | Peri-operative<br>treatment |
|---------|-----|-----|----------------|-------------------------------------|------------------------|----------------------------|---------------------|------------------------|---------------------------------|-----------------------------|
| 1       | F   | 74  | A              | 3rd                                 | Lives alone            | 15                         | Partial Gastrectomy | Laparoscopic           | Yes                             | Nil                         |
| 2       | M   | 59  | B              | 3rd                                 | Lives alone            | 27                         | Total Gastrectomy   | Open surgery           | Yes                             | Chemotherapy                |
| 3       | M   | 71  | A              | 1st                                 | Lives alone            | 16                         | Partial Gastrectomy | Open surgery           | Yes                             | Nil                         |
| 4       | M   | 43  | A              | 2nd                                 | Lives with<br>parents  | 15                         | Total Gastrectomy   | Open surgery           | Yes                             | Chemotherapy                |
| 5       | M   | 80  | A              | 3rd                                 | Lives alone            | 23                         | Partial Gastrectomy | Laparoscopic           | Yes                             | Nil                         |
| 6       | F   | 52  | A              | 2nd                                 | Lives with<br>children | 32                         | Total Gastrectomy   | Open surgery           | No                              | Chemotherapy                |
| 7       | M   | 79  | A              | 1st                                 | Lives with<br>spouse   | 58                         | Total Gastrectomy   | Laparoscopic           | Yes                             | Chemotherapy                |
| 8       | F   | 63  | A              | 1st                                 | Lives alone            | 5                          | Total Gastrectomy   | Open surgery           | No                              | Nil                         |
| 9       | M   | 61  | A              | 3rd                                 | Lives with<br>spouse   | 170                        | Total Gastrectomy   | Open surgery           | No                              | Nil                         |

|    |    |    |   |     |                   |     |                     |              |     |              |
|----|----|----|---|-----|-------------------|-----|---------------------|--------------|-----|--------------|
| 10 | M  | 61 | C | 1st | Lives alone       | 79  | Total Gastrectomy   | Open surgery | No  | Chemotherapy |
| 11 | M  | 76 | A | 4th | Lives with spouse | 110 | Total Gastrectomy   | Laparoscopic | Yes | Chemotherapy |
| 12 | F  | 82 | A | 4th | Lives alone       | 62  | Partial Gastrectomy | Open surgery | No  | Nil          |
| 13 | F  | 59 | A | 2nd | Lives with spouse | 19  | Partial Gastrectomy | Open surgery | No  | Chemotherapy |
| 14 | M  | 70 | B | 1st | Lives alone       | 11  | Partial Gastrectomy | Open surgery | No  | Nil          |
| 15 | F  | 56 | M | 5th | Lives with parent | 33  | Total Gastrectomy   | Open surgery | Yes | Chemotherapy |
| 16 | F  | 84 | A | 1st | Lives alone       | 17  | Partial Gastrectomy | Laparoscopic | Yes | Nil          |
| 17 | M  | 48 | A | 4th | Lives with parent | 9   | Total Gastrectomy   | Laparoscopic | Yes | Chemotherapy |
| 18 | M  | 77 | A | 4th | Lives with spouse | 78  | Total Gastrectomy   | Open surgery | Yes | Nil          |
| 19 | Fe | 58 | A | 3rd | Lives with spouse | 11  | Partial Gastrectomy | Laparoscopic | No  | Nil          |

1  
2  
3  
4  
5  
6  
7  
8  
9  
10  
11  
12  
13  
14  
15  
16  
17  
18  
19  
20  
21  
22  
23  
24  
25  
26  
27  
28  
29  
30  
31  
32  
33  
34  
35  
36  
37  
38  
39  
40  
41  
42  
43  
44  
45  
46

|    |   |    |   |     |                   |    |                     |              |    |              |
|----|---|----|---|-----|-------------------|----|---------------------|--------------|----|--------------|
| 20 | M | 54 | A | 1st | Lives with spouse | 48 | Partial Gastrectomy | Open surgery | No | Chemotherapy |
|----|---|----|---|-----|-------------------|----|---------------------|--------------|----|--------------|

\*A=, B= , C= , M= . \*\*Social deprivation quintile: 1<sup>st</sup> quintile being the least deprived, 5<sup>th</sup> quintile being the most deprived.

For peer review only

## Discussion

To our knowledge, this is the first in-depth qualitative study exploring the priorities of patients following potentially curative surgery for gastric cancer. The study focussed on this cohort as one of the main aims was to identify outcomes which would be considered for inclusion in a COS for potentially curative surgical trials in gastric cancer. This present study will be used to help generate a list of outcomes that will be presented for prioritisation to healthcare professionals and patients in an international, multi-language online Delphi survey. The results of the Delphi survey will inform a consensus meeting to finalise the COS. Whilst other COS studies in the field of cancer<sup>17-19</sup> may have identified similar important outcomes such as survival, it was important to consider our participants separately given the unique problems which arise with gastrectomy. These include distinctive short and long-term problems related to surgery such as anastomotic leak and reactive hypoglycaemia (Dumping syndrome) which would not be relevant in other COS.

The themes identified highlight the profound and wide-ranging physical, social and psychological impacts that gastrectomy has on patients which can persist for months and years. We have previously described the reporting of outcomes in surgical trials for gastric cancer over a twenty-year period<sup>5</sup>. Most surgical trials in this field have focused on reporting short-term post-operative outcomes. Whilst these are important to patients, they are not representative of the whole picture. This work highlights how patient priorities for outcomes may differ from the traditional surgical focus. More work is now needed to develop the COS which incorporates views of all key stakeholders including patients.

More than half of the 'top-ten' most frequently discussed outcomes in our study related to longer-term issues such as problems with eating, returning to 'normality', fatigue, weight loss, gastro-intestinal symptoms and psychological impacts. These types of outcomes are infrequently reported in surgical trials and demonstrate that researchers within this field have not reflected the priorities of patients.

This challenge needs to be addressed using an approach which is inclusive of patients and their views.

The GASTROS study aims to develop a COS; critically important outcomes which should be reported - as a minimum - by future surgical trials for gastric cancer<sup>6</sup>. By standardising the reporting of such outcomes, it aims to improve the ability to synthesise evidence, reduce research waste and ultimately



1  
2  
3 aid researchers in answering important questions related to gastrectomy. The first stage in developing  
4 the COS consists of identifying a 'long-list' of outcomes which will then be prioritised by key  
5 stakeholders during an international online Delphi survey. The process of developing the long-list  
6 should be comprehensive and involve both healthcare professionals and patients in order to minimise  
7 the risk of omitting potentially important outcomes. Our study reaffirms the importance of a mixed-  
8 methods approach to identifying potentially important outcomes. As others COS developers have  
9 found, building a long-list based solely on outcomes reported in previous trials or as developed by  
10 clinicians often neglects the views of key stakeholders<sup>8-10</sup>. This ultimately runs the risk of producing a  
11 COS which does not reflect the priorities of patients which does little to address the current challenges  
12 with outcome reporting.  
13  
14

15  
16 Understanding patient priorities following gastrectomy is invaluable for other reasons. Patients with  
17 gastric cancer want detailed information about their condition and treatment<sup>20</sup>. With the knowledge  
18 that long-term impacts of surgery are important, healthcare professionals can tailor the consent  
19 process prior to surgery to ensure that the patient has a better understanding of these and is making an  
20 informed decision. Considering patient priorities may also have implications for the future  
21 development of national and international audits<sup>3,4</sup>. For several pragmatic reasons, most  
22 comprehensive gastric cancer surgery audits focus on short-term outcomes. Identifying methods to  
23 report longer-term quality outcome measures may make such audits more relevant to patients. Studies  
24 assessing patients' views in similar disease areas found similar things, that long term outcomes  
25 (survival and long term quality of life) were important<sup>21</sup>.  
26  
27  
28  
29  
30  
31  
32  
33  
34  
35  
36  
37  
38  
39  
40  
41  
42  
43  
44  
45

#### 46 Strengths and weaknesses

47  
48 The study was able to gain an in-depth understanding of patient priorities based on the experience of  
49 participants with a broad range of characteristics representative of those undergoing surgery for  
50 gastric cancer in the UK<sup>4</sup>. Furthermore, our purposive sampling approach was established *a priori* in a  
51 study protocol which had undergone a robust peer-review process.  
52  
53  
54  
55  
56  
57  
58  
59  
60

1  
2  
3 This study was also able to highlight and address significant challenges associated with the  
4 comprehension of medical language by patients; particularly terms central to the development of a  
5 COS. Patients largely did not understand the use of the term ‘outcome’ within the context of medical  
6 research. Once it was defined as an ‘impact or effect of a treatment which may be beneficial or  
7 harmful’, participants were more easily able to describe their key priorities in outcome reporting for  
8 future trials. This has several implications for the GASTROS study as well as other COS projects  
9 moving forward. It highlights the importance of ensuring that the premise of the study is clear and  
10 understood by all participants, especially patients; outcomes included in the Delphi survey must be  
11 presented and explained in a manner which is accessible to all; ‘outcome’ must be clear when  
12 adapting it to other regions where there may be no direct translation for the term.  
13  
14  
15  
16  
17  
18  
19  
20  
21  
22  
23  
24

25 The interviews were conducted by an expert in the field of gastric cancer surgery which may have  
26 resulted in a degree of observer bias. To mitigate this potential limitation, the study management team  
27 (which was made up primarily of members unfamiliar with gastric cancer surgery) was involved in  
28 ongoing discussions during data collection and analysis. It is also possible that patients modified their  
29 responses because of awareness of the background of the interviewer. Every effort was made to  
30 follow the semi-structured interview schedule, to put the patients at ease and take time to let them  
31 talk. The average length of the interviews (greater than 45 mins) reflects the time patients were given  
32 to express their views.  
33  
34  
35  
36  
37  
38  
39  
40  
41

42 A further potential limitation of this present interview study is a lack of international patient  
43 participation. Consequently, there may be outcomes which are relevant to non-UK patients that have  
44 not been identified. Gastric cancer is an international disease and cultural and regional influences  
45 may alter expectations and priorities of patients. Whilst we have not identified evidence from COS  
46 developers in other fields that confirms these variations, it remains a possibility. Our reasons for  
47 limiting the interviews to UK-only patients were primarily down to pragmatism and finite resources.  
48 To mitigate this, the Delphi survey will be available in several languages and during the first round,  
49 all participants will be able to submit additional outcomes that they believe were omitted. These will  
50 be considered by the study team and presented for prioritisation by participants in round two of the  
51  
52  
53  
54  
55  
56  
57  
58  
59  
60

1  
2  
3 Delphi survey, if appropriate. Adopting this approach also enables the exploration of regional  
4 variations in outcome priorities which may form the basis of a future international qualitative study.  
5  
6

7  
8 This study focusses primarily on the impact of gastrectomy from the perspective of patients.  
9

10 However, we acknowledge that major complex surgery such as gastrectomy inevitably results in both  
11 direct and indirect effects on family members and caregivers. Whilst these wider impacts warrant  
12 further examination, we limited participation in this present study to patients, as the scope of the COS  
13 aims to consider the perspective and priorities of patients, surgeons and oncology nurses. Part of our  
14 planned future work is to review the COS to ensure that it remains up-to-date and relevant. At this  
15 point, it will be possible to widen participation beyond these three groups to include caregivers and  
16 other allied healthcare professionals.  
17  
18  
19  
20  
21  
22  
23

24  
25 Recruitment to the study stopped when no new data with interpretative value was identified<sup>22</sup>.  
26

27 However, 'data saturation' is a topic which deserves further discussion as there is no way of knowing  
28 for certain that no new outcomes would have been identified had further interviews been undertaken.  
29

30 Some argue that the term 'data saturation' is often mis-used and misunderstood and should be  
31 operationalised in a way consistent with the scope of the study being undertaken<sup>23</sup>. As described  
32 above, the ability of patients and healthcare participants to suggest further outcomes in round one of  
33 the Delphi survey aims to mitigate against this potential limitation.  
34  
35  
36  
37  
38  
39

40 Most participants had undergone their surgery at least 12 months prior to this study. As such, it should  
41 be acknowledged that there may have been a greater exploration of and emphasis on shorter-term  
42 outcomes had we recruited more participants from a shorter post-operative time-period. Again, to  
43 address this potential limitation, we plan to recruit participants for the Delphi survey from all post-  
44 operative periods and will have the opportunity to examine whether 'time from surgery' affects  
45 patient priorities.  
46  
47  
48  
49  
50  
51  
52  
53

54 In summary, this study identified 38 unique outcomes which are important to patients following  
55 surgery for gastric cancer. Many of these outcomes are poorly represented by trials within this  
56  
57  
58  
59  
60

1  
2  
3 research field. These outcomes will be added to other potentially important outcomes to be considered  
4  
5 for prioritisation by key stakeholders to develop a COS for surgical trials in gastric cancer.  
6  
7  
8  
9  
10  
11  
12  
13  
14  
15  
16  
17  
18  
19  
20  
21  
22  
23  
24  
25  
26  
27  
28  
29  
30  
31  
32  
33  
34  
35  
36  
37  
38  
39  
40  
41  
42  
43  
44  
45  
46  
47  
48  
49  
50  
51  
52  
53  
54  
55  
56  
57  
58  
59  
60

For peer review only

## References

1. Fact Sheets by Cancer. [http://globocan.iarc.fr/Pages/fact\\_sheets\\_cancer.aspx](http://globocan.iarc.fr/Pages/fact_sheets_cancer.aspx). Accessed July 24, 2017.
2. Colquhoun A, Arnold M, Ferlay J, Goodman KJ, Forman D, Soerjomataram I. Global patterns of cardia and non-cardia gastric cancer incidence in 2012. *Gut*. 2015;64(12):1881-1888. doi:10.1136/gutjnl-2014-308915
3. Messenger M, de Steur WO, van Sandick JW, et al. Variations among 5 European countries for curative treatment of resectable oesophageal and gastric cancer: A survey from the EURECCA Upper GI Group (EUropean REgistration of Cancer CAre). *Eur J Surg Oncol*. 2016;42(1):116-122. doi:10.1016/j.ejso.2015.09.017
4. Michalowski J, Salvador A, Napper R. *Commissioned by Healthcare Quality Improvement Partnership National Oesophago-Gastric Cancer Audit 2018 An Audit of the Care Received by People with Oesophago-Gastric Cancer in England and Wales 2018 Annual Report.*; 2018. <https://www.nogca.org.uk/content/uploads/2018/09/NOGCA-2018-Annual-Report-1.pdf>. Accessed January 2, 2019.
5. Alkhaffaf B, Blazeby JM, Williamson PR, Bruce IA, Glenny A-M. Reporting of outcomes in gastric cancer surgery trials: a systematic review. *BMJ Open*. 2018;8(10):e021796. doi:10.1136/BMJOPEN-2018-021796
6. Alkhaffaf B, Glenny A-M, Blazeby JM, Williamson P, Bruce IA. Standardising the Reporting of Outcomes in Gastric Cancer Surgery Trials: Protocol for the Development of a Core Outcome Set and Accompanying Outcome Measurement Instrument Set (The GASTROS Study). *Trials*. 2017;18(1):370. doi:10.1186/s13063-017-2100-7
7. Williamson PR, Altman DG, Bagley H, et al. The COMET Handbook: version 1.0. *Trials*. 2017;18(S3):280. doi:10.1186/s13063-017-1978-4
8. Sanderson T, Morris M, Calnan M, Richards P, Hewlett S. What outcomes from

- 1  
2  
3 pharmacologic treatments are important to people with rheumatoid arthritis? Creating the basis  
4 of a patient core set. *Arthritis Care Res (Hoboken)*. 2010;62(5):640-646.  
5  
6 doi:10.1002/acr.20034  
7  
8  
9
- 10 9. Allard A, Fellowes A, Shilling V, Janssens A, Beresford B, Morris C. Key health outcomes for  
11 children and young people with neurodisability: qualitative research with young people and  
12 parents. *BMJ Open*. 2014;4(4):e004611. doi:10.1136/bmjopen-2013-004611  
13  
14  
15  
16
- 17 10. Arnold LM, Crofford LJ, Mease PJ, et al. Patient perspectives on the impact of fibromyalgia.  
18 *Patient Educ Couns*. 2008;73(1):114-120. doi:10.1016/j.pec.2008.06.005  
19  
20  
21
- 22 11. Keeley T, Williamson P, Callery P, et al. The use of qualitative methods to inform Delphi  
23 surveys in core outcome set development. *Trials*. 2016;17(1):230. doi:10.1186/s13063-016-  
24 1356-7  
25  
26  
27  
28
- 29 12. Thomas DR. A General Inductive Approach for Analyzing Qualitative Evaluation Data. *Am J*  
30 *Eval*. 2006;27(2):237-246. doi:10.1177/1098214005283748  
31  
32  
33
- 34 13. Braun V, Clarke V. Using thematic analysis in psychology. *Qual Res Psychol*. 2006;3(2):77-  
35 101. doi:10.1191/1478088706qp063oa  
36  
37  
38
- 39 14. Corbin J, Strauss A. *Grounded Theory Research: Procedures, Canons, and Evaluative*  
40 *Criteria*. Vol 13.; 1990. [https://med-fom-familymed-](https://med-fom-familymed-research.sites.olt.ubc.ca/files/2012/03/W10-Corbin-and-Strauss-grounded-theory.pdf)  
41 [research.sites.olt.ubc.ca/files/2012/03/W10-Corbin-and-Strauss-grounded-theory.pdf](https://med-fom-familymed-research.sites.olt.ubc.ca/files/2012/03/W10-Corbin-and-Strauss-grounded-theory.pdf).  
42  
43  
44  
45 Accessed August 10, 2019.  
46  
47
- 48 15. O'Brien BC, Harris IB, Beckman TJ, Reed DA, Cook DA. Standards for Reporting Qualitative  
49 Research. *Acad Med*. 2014;89(9):1245-1251. doi:10.1097/ACM.0000000000000388  
50  
51  
52
- 53 16. Standards | INVOLVE. <https://www.invo.org.uk/current-work/standards/>. Accessed December  
54 7, 2019.  
55  
56
- 57 17. McNair AGK, Whistance RN, Forsythe RO, et al. Core Outcomes for Colorectal Cancer  
58 Surgery: A Consensus Study. *PLOS Med*. 2016;13(8):e1002071.  
59  
60

- 1  
2  
3 doi:10.1371/journal.pmed.1002071  
4  
5  
6 18. Fish R, Sanders C, Adams R, et al. A core outcome set for clinical trials of chemoradiotherapy  
7 interventions for anal cancer (CORMAC): a patient and health-care professional consensus.  
8 *lancet Gastroenterol Hepatol*. 2018;3(12):865-873. doi:10.1016/S2468-1253(18)30264-4  
9  
10  
11  
12  
13 19. MacLennan S, Bekema HJ, Williamson PR, et al. A core outcome set for localised prostate  
14 cancer effectiveness trials: protocol for a systematic review of the literature and stakeholder  
15 involvement through interviews and a Delphi survey. *Trials*. 2015;16:76. doi:10.1186/s13063-  
16 015-0598-0  
17  
18  
19  
20  
21  
22 20. McNair AGK, Brookes ST, Kinnersley P, Blazeby JM. What surgeons should tell patients with  
23 oesophago-gastric cancer: A cross sectional study of information needs. *Eur J Surg Oncol*.  
24 2013;39(11):1278-1286. doi:10.1016/J.EJSO.2013.08.005  
25  
26  
27  
28  
29 21. Avery KNL, Chalmers KA, Brookes ST, et al. Development of a Core Outcome Set for  
30 Clinical Effectiveness Trials in Esophageal Cancer Resection Surgery. *Ann Surg*. March  
31 2017;1. doi:10.1097/SLA.0000000000002204  
32  
33  
34  
35  
36 22. Onwuegbuzie AJ, Dickinson WB, Leech NL, Zoran AG. *A Qualitative Framework for*  
37 *Collecting and Analyzing Data in Focus Group Research.*; 2009.  
38  
39  
40  
41 23. Saunders B, Sim J, Kingstone T, et al. Saturation in qualitative research: exploring its  
42 conceptualization and operationalization. *Qual Quant*. 2018;52(4):1893-1907.  
43  
44  
45 doi:10.1007/s11135-017-0574-8  
46  
47  
48  
49  
50  
51  
52  
53  
54  
55  
56  
57  
58  
59  
60

## Appendix 1. Development of themes

Theme: Surviving and Controlling Cancer

| Issues identified on initial coding         | Outcome              | Outcome theme                    |
|---------------------------------------------|----------------------|----------------------------------|
| Being cured of cancer                       | Recurrence of Cancer | Surviving and Controlling Cancer |
| Cancer returning to other parts of the body |                      |                                  |
| Cancer returning in the abdomen             |                      |                                  |
| Possibility of cancer returning             |                      |                                  |
| Being able to live (a little/a lot) longer  | Survival             |                                  |
| Being alive/surviving for a 'long time'     |                      |                                  |
| Chances of (not) dying from cancer          |                      |                                  |
| Chances of survival                         |                      |                                  |

Theme: Adverse events following surgery

| Issues identified on initial coding                                              | Outcome                          | Outcome theme                       |
|----------------------------------------------------------------------------------|----------------------------------|-------------------------------------|
| Complications related to anaesthesia                                             | Anaesthetic complications        | Adverse events following of Surgery |
| Anastomotic leak                                                                 | Anastomotic complications        |                                     |
| Anastomotic stricture                                                            |                                  |                                     |
| Internal bleeding requiring further intervention                                 | Bleeding                         |                                     |
| Concern about cardiac complications in context of previous myocardial infarction | Cardiac complications            |                                     |
| Racing heart beat                                                                |                                  |                                     |
| Stroke following surgery                                                         | Cerebro-vascular complications   |                                     |
| Bowel perforation                                                                | Intestinal complications         |                                     |
| Gastro-intestinal symptoms e.g. constipation                                     |                                  |                                     |
| Obstruction of bowel                                                             |                                  |                                     |
| Epidural related complications                                                   | Medication related complications |                                     |
| Hallucinations                                                                   |                                  |                                     |
| Overdose of medications such as morphine                                         |                                  |                                     |
| Side effects of sedatives                                                        |                                  |                                     |
| Drains and tubes to manage complications                                         | Need for re-intervention         |                                     |
| Endoscopic treatment of anastomotic stricture                                    |                                  |                                     |
| Requiring further surgery to manage complications                                |                                  |                                     |
|                                                                                  |                                  |                                     |



|                                                      |                           |  |
|------------------------------------------------------|---------------------------|--|
| Surgery for incisional hernia                        |                           |  |
| ‘Surviving’ surgery                                  |                           |  |
| Dying from a complication of surgery                 | Peri-operative death      |  |
| Dying on the operating table                         |                           |  |
| Hospital acquired pneumonia                          |                           |  |
| Pleural effusion                                     | Respiratory complications |  |
| Pneumothorax                                         |                           |  |
| Re-admission due to complications such as infections | Re-admission to hospital  |  |
| Re-admission due to pain                             |                           |  |
| Wound dehiscence                                     |                           |  |
| Wound infection                                      | Wound complications       |  |
| Wound leak                                           |                           |  |
| Wound numbness                                       |                           |  |
| Catheter-related problems                            | Urinary complications     |  |

Theme: Long-term impact of surgery

| Issues identified on initial coding                        | Outcome                   | Outcome theme               |
|------------------------------------------------------------|---------------------------|-----------------------------|
| Being able to enjoy a good quality of life                 |                           |                             |
| Uncertainty as to what life will be like following surgery | Overall ‘quality of life’ |                             |
| Changes in mood                                            |                           |                             |
| Clinical depression                                        |                           |                             |
| Feeling ‘abnormal’ and ‘different’ to others               | Psychological impact      |                             |
| Feelings of insecurity                                     |                           |                             |
| Feelings of isolation                                      |                           |                             |
| Issues related to body image                               |                           | Long-term impact of surgery |
| Low mood                                                   |                           |                             |
| Being able to enjoy eating again                           |                           |                             |
| Being able to exercise again                               |                           |                             |
| Being able to interact and socialise with others           | Returning to ‘normality’  |                             |
| Being able to live ‘as they did before’                    |                           |                             |
| Being able to rely on oneself to undertake tasks           |                           |                             |
| Being able to undertake household activities               |                           |                             |

|                                |  |  |
|--------------------------------|--|--|
| such as shopping and gardening |  |  |
| Returning to employment        |  |  |

Theme: Technical aspects of surgery

| Issues identified on initial coding                                                                                                                                                               | Outcome                      | Outcome theme                |
|---------------------------------------------------------------------------------------------------------------------------------------------------------------------------------------------------|------------------------------|------------------------------|
| 'Cutting' the cancer out<br>Ensuring no cancer is left behind<br>Getting 'rid' of the cancer<br>Inability to resect cancer at surgery<br>Removing all lymph nodes<br>Removing spleen if necessary | Complete resection of cancer | Technical aspects of surgery |
| Ability to perform laparoscopic 'keyhole' surgery<br>Large scars                                                                                                                                  | Size of incisions            |                              |
| Duration of surgery                                                                                                                                                                               | Duration of surgery          |                              |

Theme: Long-term problems following surgery

| Issues identified on initial coding                                                                                                                                           | Outcome                    | Outcome theme                        |
|-------------------------------------------------------------------------------------------------------------------------------------------------------------------------------|----------------------------|--------------------------------------|
| Amounts able to eat and drink<br>Being able to eat 'properly'<br>Being able to eat at home<br>Change in diet and types of food patient can consume<br>Difficulties swallowing | Eating and Drinking        | Long-term problems following surgery |
| Requirement for ongoing nutritional support<br>Vitamin B12 deficiency                                                                                                         | Nutritional problems       |                                      |
| Feeling persistently tired<br>Feeling extremely weak/lethargic/tired<br>Having no energy or stamina<br>Loss of energy following simple tasks                                  | Fatigue                    |                                      |
| Abdominal bloating<br>Belching<br>Diarrhoea<br>Dumping syndrome<br>Excessive flatus<br>Nausea                                                                                 | Gastro-intestinal symptoms |                                      |

|                                             |                 |  |
|---------------------------------------------|-----------------|--|
| Reflux symptoms (acid or bile)              |                 |  |
| Vomiting                                    |                 |  |
| Abdominal pain or cramps                    | Chronic Pain    |  |
| Headaches and migraines                     |                 |  |
| Long-term wound related pain                |                 |  |
| Muscle cramps                               |                 |  |
| Pain on swallowing                          |                 |  |
| Painful abdominal distension or bloating    |                 |  |
| Inability to regain weight to desired level | Weight problems |  |
| Readjusting to new weight                   |                 |  |
| Speed of weight loss                        |                 |  |
| Weight loss in general                      |                 |  |

Theme: Recovery Following surgery

| Issues identified on initial coding                                        | Outcome                             | Outcome theme              |
|----------------------------------------------------------------------------|-------------------------------------|----------------------------|
| Post-operative plan for physiotherapy                                      | Ambulation                          | Recovery following surgery |
| Restricted mobility due to drains and tubes attached                       |                                     |                            |
| Time to be able to undertake tasks such as standing up, walking or bathing |                                     |                            |
| Time before being allowed to eat and drink                                 | Return of gastrointestinal function |                            |
| Time before bowel function returned                                        |                                     |                            |
| Concern about being too unwell for further chemotherapy                    | Ability to have more chemotherapy   |                            |
| Length of time in hospital                                                 | Duration of hospital stay           |                            |
| Length of time in intensive care                                           |                                     |                            |
| Length of time in pain                                                     | Post-operative pain                 |                            |
| Patterns of pain                                                           |                                     |                            |
| Requirement for analgesia                                                  |                                     |                            |
| Severity of pain                                                           |                                     |                            |

## Appendix 2. Summary of outcomes and outcome themes identified from interviews.

| Outcome Theme                                                                                                                                                             | Outcome                               | How many interviews outcome was referenced in | Total number of references in all interviews |
|---------------------------------------------------------------------------------------------------------------------------------------------------------------------------|---------------------------------------|-----------------------------------------------|----------------------------------------------|
| <b>Surviving and controlling cancer</b> <ul style="list-style-type: none"> <li>• Referenced in 20 interviews</li> <li>• Referenced 90 times in all interviews.</li> </ul> | Curing Cancer                         | 4                                             | 6                                            |
|                                                                                                                                                                           | Recurrence of Cancer                  | 18                                            | 28                                           |
|                                                                                                                                                                           | Survival                              | 20                                            | 56                                           |
| <b>Technical aspects of surgery</b> <ul style="list-style-type: none"> <li>• Referenced in 18 interviews</li> <li>• Referenced 52 times in all interviews.</li> </ul>     | Complete Excision of Cancer           | 18                                            | 52                                           |
|                                                                                                                                                                           | Excision of Lymph Nodes               | 5                                             | 5                                            |
|                                                                                                                                                                           | Need for splenectomy                  | 1                                             | 1                                            |
|                                                                                                                                                                           | Operative time                        | 1                                             | 2                                            |
|                                                                                                                                                                           | Wound Size                            | 7                                             | 11                                           |
| <b>Adverse events</b> <ul style="list-style-type: none"> <li>• Referenced in 20 interviews</li> <li>• Referenced 97 times in all interviews.</li> </ul>                   | Ability to have adjuvant chemotherapy | 1                                             | 1                                            |
|                                                                                                                                                                           | Anaesthetic Complications             | 1                                             | 1                                            |
|                                                                                                                                                                           | Anastomotic Leak                      | 6                                             | 9                                            |
|                                                                                                                                                                           | Anastomotic Stricture                 | 1                                             | 1                                            |
|                                                                                                                                                                           | B12 Deficiency                        | 5                                             | 5                                            |
|                                                                                                                                                                           | Bleeding                              | 1                                             | 2                                            |
|                                                                                                                                                                           | Cardiac Complications                 | 2                                             | 2                                            |
|                                                                                                                                                                           | Catheter related complications        | 1                                             | 1                                            |
|                                                                                                                                                                           | Cerebro-vascular complications        | 1                                             | 1                                            |
|                                                                                                                                                                           | Gastrointestinal problems             | 1                                             | 1                                            |
|                                                                                                                                                                           | Hernia                                | 1                                             | 1                                            |
|                                                                                                                                                                           | Intestinal complications              | 4                                             | 10                                           |
|                                                                                                                                                                           | Medication-related complications      | 10                                            | 12                                           |
| Need for reintervention                                                                                                                                                   | 8                                     | 13                                            |                                              |

|                                                                                                                                    |                                  |    |    |
|------------------------------------------------------------------------------------------------------------------------------------|----------------------------------|----|----|
|                                                                                                                                    | Peri-operative death             | 12 | 20 |
|                                                                                                                                    | Re-Admission to Hospital         | 3  | 4  |
|                                                                                                                                    | Respiratory complications        | 3  | 3  |
|                                                                                                                                    | Wound Complications              | 8  | 10 |
| <b>Recovery from surgery</b>                                                                                                       | In Hospital Recovery             | 11 | 23 |
|                                                                                                                                    | Length of Stay Following Surgery | 11 | 18 |
| <ul style="list-style-type: none"> <li>• Referenced in 18 interviews</li> <li>• Referenced 57 times in all interviews.</li> </ul>  | Peripheral Oedema                | 1  | 1  |
| <b>Long-terms problems following surgery</b>                                                                                       | Eating & Drinking                | 20 | 75 |
|                                                                                                                                    | Fatigue                          | 16 | 38 |
|                                                                                                                                    | Gastrointestinal symptoms        | 11 | 27 |
| <ul style="list-style-type: none"> <li>• Referenced in 20 interviews</li> <li>• Referenced 175 times in all interviews.</li> </ul> | Pain                             | 10 | 14 |
|                                                                                                                                    | Weight Loss                      | 12 | 21 |
| <b>Long-term impacts of surgery</b>                                                                                                | Necessity of long-term feeding   | 1  | 1  |
|                                                                                                                                    | Overall QoL                      | 8  | 10 |
| <ul style="list-style-type: none"> <li>• Referenced in 20 interviews</li> <li>• Referenced 133 times in all interviews.</li> </ul> | Psychological impact             | 11 | 40 |
|                                                                                                                                    | Returning to normality           | 20 | 82 |

# Reporting checklist for qualitative study.

Based on the SRQR guidelines.

## Instructions to authors

Complete this checklist by entering the page numbers from your manuscript where readers will find each of the items listed below.

Your article may not currently address all the items on the checklist. Please modify your text to include the missing information. If you are certain that an item does not apply, please write "n/a" and provide a short explanation.

Upload your completed checklist as an extra file when you submit to a journal.

In your methods section, say that you used the SRQR reporting guidelines, and cite them as:

O'Brien BC, Harris IB, Beckman TJ, Reed DA, Cook DA. Standards for reporting qualitative research: a synthesis of recommendations. *Acad Med.* 2014;89(9):1245-1251.

|                     | Reporting Item                                                                                                                                                                                                                                          | Page Number |
|---------------------|---------------------------------------------------------------------------------------------------------------------------------------------------------------------------------------------------------------------------------------------------------|-------------|
| <b>Title</b>        |                                                                                                                                                                                                                                                         |             |
|                     | <a href="#">#1</a> Concise description of the nature and topic of the study identifying the study as qualitative or indicating the approach (e.g. ethnography, grounded theory) or data collection methods (e.g. interview, focus group) is recommended | 1           |
| <b>Abstract</b>     |                                                                                                                                                                                                                                                         |             |
|                     | <a href="#">#2</a> Summary of the key elements of the study using the abstract format of the intended publication; typically includes background, purpose, methods, results and conclusions                                                             | 4           |
| <b>Introduction</b> |                                                                                                                                                                                                                                                         |             |
| Problem formulation | <a href="#">#3</a> Description and significance of the problem / phenomenon studied: review of relevant theory and empirical work; problem statement                                                                                                    | 7           |

|    |                              |                     |                                                           |    |
|----|------------------------------|---------------------|-----------------------------------------------------------|----|
| 1  | Purpose or research          | <a href="#">#4</a>  | Purpose of the study and specific objectives or           | 7  |
| 2  | question                     |                     | questions                                                 |    |
| 3  |                              |                     |                                                           |    |
| 4  | <b>Methods</b>               |                     |                                                           |    |
| 5  |                              |                     |                                                           |    |
| 6  |                              |                     |                                                           |    |
| 7  | Qualitative approach and     | <a href="#">#5</a>  | Qualitative approach (e.g. ethnography, grounded          | 9  |
| 8  | research paradigm            |                     | theory, case study, phenomenology, narrative research)    |    |
| 9  |                              |                     | and guiding theory if appropriate; identifying the        |    |
| 10 |                              |                     | research paradigm (e.g. postpositivist, constructivist /  |    |
| 11 |                              |                     | interpretivist) is also recommended; rationale. The       |    |
| 12 |                              |                     | rationale should briefly discuss the justification for    |    |
| 13 |                              |                     | choosing that theory, approach, method or technique       |    |
| 14 |                              |                     | rather than other options available; the assumptions      |    |
| 15 |                              |                     | and limitations implicit in those choices and how those   |    |
| 16 |                              |                     | choices influence study conclusions and transferability.  |    |
| 17 |                              |                     | As appropriate the rationale for several items might be   |    |
| 18 |                              |                     | discussed together.                                       |    |
| 19 |                              |                     |                                                           |    |
| 20 |                              |                     |                                                           |    |
| 21 |                              |                     |                                                           |    |
| 22 |                              |                     |                                                           |    |
| 23 |                              |                     |                                                           |    |
| 24 |                              |                     |                                                           |    |
| 25 |                              |                     |                                                           |    |
| 26 | Researcher characteristics   | <a href="#">#6</a>  | Researchers' characteristics that may influence the       | 10 |
| 27 | and reflexivity              |                     | research, including personal attributes, qualifications / |    |
| 28 |                              |                     | experience, relationship with participants, assumptions   |    |
| 29 |                              |                     | and / or presuppositions; potential or actual interaction |    |
| 30 |                              |                     | between researchers' characteristics and the research     |    |
| 31 |                              |                     | questions, approach, methods, results and / or            |    |
| 32 |                              |                     | transferability                                           |    |
| 33 |                              |                     |                                                           |    |
| 34 |                              |                     |                                                           |    |
| 35 |                              |                     |                                                           |    |
| 36 |                              |                     |                                                           |    |
| 37 | Context                      | <a href="#">#7</a>  | Setting / site and salient contextual factors; rationale  | 10 |
| 38 |                              |                     |                                                           |    |
| 39 |                              |                     |                                                           |    |
| 40 | Sampling strategy            | <a href="#">#8</a>  | How and why research participants, documents, or          | 9  |
| 41 |                              |                     | events were selected; criteria for deciding when no       |    |
| 42 |                              |                     | further sampling was necessary (e.g. sampling             |    |
| 43 |                              |                     | saturation); rationale                                    |    |
| 44 |                              |                     |                                                           |    |
| 45 |                              |                     |                                                           |    |
| 46 | Ethical issues pertaining to | <a href="#">#9</a>  | Documentation of approval by an appropriate ethics        | 11 |
| 47 | human subjects               |                     | review board and participant consent, or explanation for  |    |
| 48 |                              |                     | lack thereof; other confidentiality and data security     |    |
| 49 |                              |                     | issues                                                    |    |
| 50 |                              |                     |                                                           |    |
| 51 |                              |                     |                                                           |    |
| 52 |                              |                     |                                                           |    |
| 53 | Data collection methods      | <a href="#">#10</a> | Types of data collected; details of data collection       | 10 |
| 54 |                              |                     | procedures including (as appropriate) start and stop      |    |
| 55 |                              |                     | dates of data collection and analysis, iterative process, |    |
| 56 |                              |                     | triangulation of sources / methods, and modification of   |    |
| 57 |                              |                     |                                                           |    |
| 58 |                              |                     |                                                           |    |
| 59 |                              |                     |                                                           |    |
| 60 |                              |                     |                                                           |    |

|    |                              |                                                                           |    |
|----|------------------------------|---------------------------------------------------------------------------|----|
| 1  |                              | procedures in response to evolving study findings;                        |    |
| 2  |                              | rationale                                                                 |    |
| 3  |                              |                                                                           |    |
| 4  | Data collection              | <a href="#">#11</a> Description of instruments (e.g. interview guides,    | 11 |
| 5  | instruments and              | questionnaires) and devices (e.g. audio recorders)                        |    |
| 6  | technologies                 | used for data collection; if / how the instruments(s)                     |    |
| 7  |                              | changed over the course of the study                                      |    |
| 8  |                              |                                                                           |    |
| 9  |                              |                                                                           |    |
| 10 | Units of study               | <a href="#">#12</a> Number and relevant characteristics of participants,  | 16 |
| 11 |                              | documents, or events included in the study; level of                      |    |
| 12 |                              | participation (could be reported in results)                              |    |
| 13 |                              |                                                                           |    |
| 14 |                              |                                                                           |    |
| 15 |                              |                                                                           |    |
| 16 | Data processing              | <a href="#">#13</a> Methods for processing data prior to and during       | 11 |
| 17 |                              | analysis, including transcription, data entry, data                       |    |
| 18 |                              | management and security, verification of data integrity,                  |    |
| 19 |                              | data coding, and anonymisation / deidentification of                      |    |
| 20 |                              | excerpts                                                                  |    |
| 21 |                              |                                                                           |    |
| 22 |                              |                                                                           |    |
| 23 |                              |                                                                           |    |
| 24 | Data analysis                | <a href="#">#14</a> Process by which inferences, themes, etc. were        | 11 |
| 25 |                              | identified and developed, including the researchers                       |    |
| 26 |                              | involved in data analysis; usually references a specific                  |    |
| 27 |                              | paradigm or approach; rationale                                           |    |
| 28 |                              |                                                                           |    |
| 29 |                              |                                                                           |    |
| 30 |                              |                                                                           |    |
| 31 | Techniques to enhance        | <a href="#">#15</a> Techniques to enhance trustworthiness and credibility | 11 |
| 32 | trustworthiness              | of data analysis (e.g. member checking, audit trail,                      |    |
| 33 |                              | triangulation); rationale                                                 |    |
| 34 |                              |                                                                           |    |
| 35 |                              |                                                                           |    |
| 36 | <b>Results/findings</b>      |                                                                           |    |
| 37 |                              |                                                                           |    |
| 38 |                              |                                                                           |    |
| 39 | Syntheses and                | <a href="#">#16</a> Main findings (e.g. interpretations, inferences, and  | 16 |
| 40 | interpretation               | themes); might include development of a theory or                         |    |
| 41 |                              | model, or integration with prior research or theory                       |    |
| 42 |                              |                                                                           |    |
| 43 |                              |                                                                           |    |
| 44 | Links to empirical data      | <a href="#">#17</a> Evidence (e.g. quotes, field notes, text excerpts,    | 16 |
| 45 |                              | photographs) to substantiate analytic findings                            |    |
| 46 |                              |                                                                           |    |
| 47 |                              |                                                                           |    |
| 48 | <b>Discussion</b>            |                                                                           |    |
| 49 |                              |                                                                           |    |
| 50 | Intergration with prior      | <a href="#">#18</a> Short summary of main findings; explanation of how    | 29 |
| 51 | work, implications,          | findings and conclusions connect to, support, elaborate                   |    |
| 52 | transferability and          | on, or challenge conclusions of earlier scholarship;                      |    |
| 53 | contribution(s) to the field | discussion of scope of application / generalizability;                    |    |
| 54 |                              | identification of unique contributions(s) to scholarship in               |    |
| 55 |                              | a discipline or field                                                     |    |
| 56 |                              |                                                                           |    |
| 57 |                              |                                                                           |    |
| 58 |                              |                                                                           |    |
| 59 |                              |                                                                           |    |
| 60 |                              |                                                                           |    |



|    |                       |                     |                                                          |    |
|----|-----------------------|---------------------|----------------------------------------------------------|----|
| 1  | Limitations           | <a href="#">#19</a> | Trustworthiness and limitations of findings              | 30 |
| 2  |                       |                     |                                                          |    |
| 3  | <b>Other</b>          |                     |                                                          |    |
| 4  |                       |                     |                                                          |    |
| 5  | Conflicts of interest | <a href="#">#20</a> | Potential sources of influence of perceived influence on | 3  |
| 6  |                       |                     | study conduct and conclusions; how these were            |    |
| 7  |                       |                     | managed                                                  |    |
| 8  |                       |                     |                                                          |    |
| 9  |                       |                     |                                                          |    |
| 10 |                       |                     |                                                          |    |
| 11 | Funding               | <a href="#">#21</a> | Sources of funding and other support; role of funders in | 2  |
| 12 |                       |                     | data collection, interpretation and reporting            |    |
| 13 |                       |                     |                                                          |    |

14  
15 The SRQR checklist is distributed with permission of Wolters Kluwer © 2014 by the Association of  
16 American Medical Colleges. This checklist was completed on 05. October 2019 using  
17 <https://www.goodreports.org/>, a tool made by the [EQUATOR Network](#) in collaboration with  
18 [Penelope.ai](#)  
19  
20  
21  
22  
23  
24  
25  
26  
27  
28  
29  
30  
31  
32  
33  
34  
35  
36  
37  
38  
39  
40  
41  
42  
43  
44  
45  
46  
47  
48  
49  
50  
51  
52  
53  
54  
55  
56  
57  
58  
59  
60
