# Supplementary material for: Patient priorities in relation to surgery for gastric cancer: qualitative interviews with gastric cancer surgery patients to inform the development of a core outcome set
Source: PubMed Central journal article supplement (PMC7044961; doi:10.1136/bmjopen-2019-034782), 2020-02-12
Supplement: bmjopen-2019-034782supp001.pdf [file bmjopen-2019-034782supp001.pdf]

**Appendix 1. Development of themes**

Theme: Surviving and Controlling Cancer

| Issues identified on initial coding                                                                                                                | Outcome              | Outcome theme                       |
|----------------------------------------------------------------------------------------------------------------------------------------------------|----------------------|-------------------------------------|
| Being cured of cancer<br>Cancer returning to other parts of the body<br>Cancer returning in the abdomen<br>Possibility of cancer returning         | Recurrence of Cancer | Surviving and<br>Controlling Cancer |
| Being able to live (a little/a lot) longer<br>Being alive/surviving for a 'long time'<br>Chances of (not) dying from cancer<br>Chances of survival | Survival             |                                     |

Theme: Adverse events following surgery

| Issues identified on initial coding                                                                                                            | Outcome                          | Outcome theme                          |
|------------------------------------------------------------------------------------------------------------------------------------------------|----------------------------------|----------------------------------------|
| Complications related to anaesthesia                                                                                                           | Anaesthetic complications        | Adverse events<br>following of Surgery |
| Anastomotic leak<br>Anastomotic stricture                                                                                                      | Anastomotic complications        |                                        |
| Internal bleeding requiring further intervention                                                                                               | Bleeding                         |                                        |
| Concern about cardiac complications in context of previous myocardial infarction<br>Racing heart beat                                          | Cardiac complications            |                                        |
| Stroke following surgery                                                                                                                       | Cerebro-vascular complications   |                                        |
| Bowel perforation<br>Gastro-intestinal symptoms e.g. constipation<br>Obstruction of bowel                                                      | Intestinal complications         |                                        |
| Epidural related complications<br>Hallucinations<br>Overdose of medications such as morphine<br>Side effects of sedatives                      | Medication related complications |                                        |
| Drains and tubes to manage complications<br>Endoscopic treatment of anastomotic stricture<br>Requiring further surgery to manage complications | Need for re-intervention         |                                        |

|                                                                                             |                           |  |
|---------------------------------------------------------------------------------------------|---------------------------|--|
| Surgery for incisional hernia                                                               |                           |  |
| ‘Surviving’ surgery<br>Dying from a complication of surgery<br>Dying on the operating table | Peri-operative death      |  |
| Hospital acquired pneumonia<br>Pleural effusion<br>Pneumothorax                             | Respiratory complications |  |
| Re-admission due to complications such as infections<br>Re-admission due to pain            | Re-admission to hospital  |  |
| Wound dehiscence<br>Wound infection<br>Wound leak<br>Wound numbness                         | Wound complications       |  |
| Catheter-related problems                                                                   | Urinary complications     |  |

Theme: Long-term impact of surgery

| Issues identified on initial coding                                                                                                                                                                                                                                 | Outcome                   | Outcome theme               |
|---------------------------------------------------------------------------------------------------------------------------------------------------------------------------------------------------------------------------------------------------------------------|---------------------------|-----------------------------|
| Being able to enjoy a good quality of life<br>Uncertainty as to what life will be like following surgery                                                                                                                                                            | Overall ‘quality of life’ | Long-term impact of surgery |
| Changes in mood<br>Clinical depression<br>Feeling ‘abnormal’ and ‘different’ to others<br>Feelings of insecurity<br>Feelings of isolation<br>Issues related to body image<br>Low mood                                                                               | Psychological impact      |                             |
| Being able to enjoy eating again<br>Being able to exercise again<br>Being able to interact and socialise with others<br>Being able to live ‘as they did before’<br>Being able to rely on oneself to undertake tasks<br>Being able to undertake household activities | Returning to ‘normality’  |                             |

|                                |  |  |
|--------------------------------|--|--|
| such as shopping and gardening |  |  |
| Returning to employment        |  |  |

Theme: Technical aspects of surgery

| Issues identified on initial coding                                                                                                                                                               | Outcome                      | Outcome theme                |
|---------------------------------------------------------------------------------------------------------------------------------------------------------------------------------------------------|------------------------------|------------------------------|
| 'Cutting' the cancer out<br>Ensuring no cancer is left behind<br>Getting 'rid' of the cancer<br>Inability to resect cancer at surgery<br>Removing all lymph nodes<br>Removing spleen if necessary | Complete resection of cancer | Technical aspects of surgery |
| Ability to perform laparoscopic 'keyhole' surgery<br>Large scars                                                                                                                                  | Size of incisions            |                              |
| Duration of surgery                                                                                                                                                                               | Duration of surgery          |                              |

Theme: Long-term problems following surgery

| Issues identified on initial coding                                                                                                                                           | Outcome                    | Outcome theme                        |
|-------------------------------------------------------------------------------------------------------------------------------------------------------------------------------|----------------------------|--------------------------------------|
| Amounts able to eat and drink<br>Being able to eat 'properly'<br>Being able to eat at home<br>Change in diet and types of food patient can consume<br>Difficulties swallowing | Eating and Drinking        | Long-term problems following surgery |
| Requirement for ongoing nutritional support<br>Vitamin B12 deficiency                                                                                                         | Nutritional problems       |                                      |
| Feeling persistently tired<br>Feeling extremely weak/lethargic/tired<br>Having no energy or stamina<br>Loss of energy following simple tasks                                  | Fatigue                    |                                      |
| Abdominal bloating<br>Belching<br>Diarrhoea<br>Dumping syndrome<br>Excessive flatus<br>Nausea                                                                                 | Gastro-intestinal symptoms |                                      |

|                                                                                                                                                                        |                 |  |
|------------------------------------------------------------------------------------------------------------------------------------------------------------------------|-----------------|--|
| Reflux symptoms (acid or bile)<br>Vomiting                                                                                                                             |                 |  |
| Abdominal pain or cramps<br>Headaches and migraines<br>Long-term wound related pain<br>Muscle cramps<br>Pain on swallowing<br>Painful abdominal distension or bloating | Chronic Pain    |  |
| Inability to regain weight to desired level<br>Readjusting to new weight<br>Speed of weight loss<br>Weight loss in general                                             | Weight problems |  |

Theme: Recovery Following surgery

| Issues identified on initial coding                                                                                                                                         | Outcome                             | Outcome theme              |
|-----------------------------------------------------------------------------------------------------------------------------------------------------------------------------|-------------------------------------|----------------------------|
| Post-operative plan for physiotherapy<br>Restricted mobility due to drains and tubes attached<br>Time to be able to undertake tasks such as standing up, walking or bathing | Ambulation                          | Recovery following surgery |
| Time before being allowed to eat and drink<br>Time before bowel function returned                                                                                           | Return of gastrointestinal function |                            |
| Concern about being too unwell for further chemotherapy                                                                                                                     | Ability to have more chemotherapy   |                            |
| Length of time in hospital<br>Length of time in intensive care                                                                                                              | Duration of hospital stay           |                            |
| Length of time in pain<br>Patterns of pain<br>Requirement for analgesia<br>Severity of pain                                                                                 | Post-operative pain                 |                            |
