# Supplementary material for: Patient priorities in relation to surgery for gastric cancer: qualitative interviews with gastric cancer surgery patients to inform the development of a core outcome set
Source: PubMed Central journal article supplement (PMC7044961; doi:10.1136/bmjopen-2019-034782), 2020-02-12
Supplement: bmjopen-2019-034782supp002.pdf [file bmjopen-2019-034782supp002.pdf]

Appendix 2. Summary of outcomes and outcome themes identified from interviews.

| Outcome Theme                                                                                                                                                         | Outcome                               | How many interviews outcome was referenced in | Total number of references in all interviews |
|-----------------------------------------------------------------------------------------------------------------------------------------------------------------------|---------------------------------------|-----------------------------------------------|----------------------------------------------|
| <b>Surviving and controlling cancer</b> <ul style="list-style-type: none"> <li>Referenced in 20 interviews</li> <li>Referenced 90 times in all interviews.</li> </ul> | Curing Cancer                         | 4                                             | 6                                            |
|                                                                                                                                                                       | Recurrence of Cancer                  | 18                                            | 28                                           |
|                                                                                                                                                                       | Survival                              | 20                                            | 56                                           |
| <b>Technical aspects of surgery</b> <ul style="list-style-type: none"> <li>Referenced in 18 interviews</li> <li>Referenced 52 times in all interviews.</li> </ul>     | Complete Excision of Cancer           | 18                                            | 52                                           |
|                                                                                                                                                                       | Excision of Lymph Nodes               | 5                                             | 5                                            |
|                                                                                                                                                                       | Need for splenectomy                  | 1                                             | 1                                            |
|                                                                                                                                                                       | Operative time                        | 1                                             | 2                                            |
|                                                                                                                                                                       | Wound Size                            | 7                                             | 11                                           |
| <b>Adverse events</b> <ul style="list-style-type: none"> <li>Referenced in 20 interviews</li> <li>Referenced 97 times in all interviews.</li> </ul>                   | Ability to have adjuvant chemotherapy | 1                                             | 1                                            |
|                                                                                                                                                                       | Anaesthetic Complications             | 1                                             | 1                                            |
|                                                                                                                                                                       | Anastomotic Leak                      | 6                                             | 9                                            |
|                                                                                                                                                                       | Anastomotic Stricture                 | 1                                             | 1                                            |
|                                                                                                                                                                       | B12 Deficiency                        | 5                                             | 5                                            |
|                                                                                                                                                                       | Bleeding                              | 1                                             | 2                                            |
|                                                                                                                                                                       | Cardiac Complications                 | 2                                             | 2                                            |
|                                                                                                                                                                       | Catheter related complications        | 1                                             | 1                                            |
|                                                                                                                                                                       | Cerebro-vascular complications        | 1                                             | 1                                            |
|                                                                                                                                                                       | Gastrointestinal problems             | 1                                             | 1                                            |
|                                                                                                                                                                       | Hernia                                | 1                                             | 1                                            |
|                                                                                                                                                                       | Intestinal complications              | 4                                             | 10                                           |
|                                                                                                                                                                       | Medication-related complications      | 10                                            | 12                                           |
| Need for reintervention                                                                                                                                               | 8                                     | 13                                            |                                              |

|                                                                                                                                                                                 |                                  |    |    |
|---------------------------------------------------------------------------------------------------------------------------------------------------------------------------------|----------------------------------|----|----|
|                                                                                                                                                                                 | Peri-operative death             | 12 | 20 |
|                                                                                                                                                                                 | Re-Admission to Hospital         | 3  | 4  |
|                                                                                                                                                                                 | Respiratory complications        | 3  | 3  |
|                                                                                                                                                                                 | Wound Complications              | 8  | 10 |
| <b>Recovery from surgery</b> <ul style="list-style-type: none"> <li>• Referenced in 18 interviews</li> <li>• Referenced 57 times in all interviews.</li> </ul>                  | In Hospital Recovery             | 11 | 23 |
|                                                                                                                                                                                 | Length of Stay Following Surgery | 11 | 18 |
|                                                                                                                                                                                 | Peripheral Oedema                | 1  | 1  |
| <b>Long-terms problems following surgery</b> <ul style="list-style-type: none"> <li>• Referenced in 20 interviews</li> <li>• Referenced 175 times in all interviews.</li> </ul> | Eating & Drinking                | 20 | 75 |
|                                                                                                                                                                                 | Fatigue                          | 16 | 38 |
|                                                                                                                                                                                 | Gastrointestinal symptoms        | 11 | 27 |
|                                                                                                                                                                                 | Pain                             | 10 | 14 |
|                                                                                                                                                                                 | Weight Loss                      | 12 | 21 |
| <b>Long-term impacts of surgery</b> <ul style="list-style-type: none"> <li>• Referenced in 20 interviews</li> <li>• Referenced 133 times in all interviews.</li> </ul>          | Necessity of long-term feeding   | 1  | 1  |
|                                                                                                                                                                                 | Overall QoL                      | 8  | 10 |
|                                                                                                                                                                                 | Psychological impact             | 11 | 40 |
|                                                                                                                                                                                 | Returning to normality           | 20 | 82 |
